# Supplementary material for: A convenient pinacol coupling of diaryl ketones with B2pin2viapyridine catalysis
Source: Royal Society of Chemistry journal article supplement (doi:10.1039/d0cc07723b), 2020-12-24

## A Convenient Pinacol Coupling of Diaryl Ketones with B<sub>2</sub>pin<sub>2</sub> via Pyridine Catalysis

Junhyuk Jo, Seonyul Kim, Jun-Ho Choi,\* and Won-jin Chung\*

Department of Chemistry, Gwangju Institute of Science and Technology, Gwangju 61005, Republic of Korea.

### Electronic Supplementary Information

|                                                                                            |            |
|--------------------------------------------------------------------------------------------|------------|
| <b>1. General Experimental</b> .....                                                       | <b>S2</b>  |
| <b>2. Experimental Procedures</b> .....                                                    | <b>S2</b>  |
| <b>2.1. Boryl Radical-Promoted Pinacol Coupling of Diaryl Ketones</b> .....                | <b>S2</b>  |
| <b>2.1.1. Homocoupling</b> .....                                                           | <b>S2</b>  |
| <b>2.1.2. Heterocoupling</b> .....                                                         | <b>S4</b>  |
| <b>2.2. Boryl Radical-Promoted Pinacol Coupling of Benzaldehyde and Acetophenone</b> ..... | <b>S4</b>  |
| <b>2.3. Preparation of 4-Methoxy-4'-(trifluoromethyl)benzophenone</b> .....                | <b>S5</b>  |
| <b>3. DFT Calculation</b> .....                                                            | <b>S5</b>  |
| <b>3.1. Benzophenone Ketyl Radical Formation</b> .....                                     | <b>S5</b>  |
| <b>3.2. Acetophenone Ketyl Radical Formation</b> .....                                     | <b>S12</b> |
| <b>3.3. Comparison between Transition State Conformers</b> .....                           | <b>S19</b> |
| <b>4. References</b> .....                                                                 | <b>S22</b> |
| <b>5. <sup>1</sup>H and <sup>13</sup>C NMR Spectra</b> .....                               | <b>S23</b> |

## 1. General Experimental

CH<sub>2</sub>Cl<sub>2</sub> (Fisher, HPLC grade), 1,4-dioxane (Fisher, HPLC grade), and THF (Fisher, HPLC grade) were dried by percolation through a column packed with neutral alumina and a column packed with Q5 reactant, a supported copper catalyst for scavenging oxygen, under a positive pressure of argon. α,α,α-Trifluorotoluene (Acros, 99+%) was dried with CaH<sub>2</sub> (Acros, 93%) and distilled under argon. The solvents which were used for pyridine-boryl radical-promoted pinacol coupling were degassed by freeze-pump-thaw. Methyl *tert*-butyl ether (MTBE) (J.T. Baker, HPLC grade) and 1,4-dioxane (Fisher, HPLC grade) were dried with Na (Alfa, 99%) in the presence of benzophenone (Alfa, 99%) and distilled under argon. 4-Bromobenzotrifluoride (Alfa, 99%) was dried with CaH<sub>2</sub> (Acros, 93%) and distilled under argon. Benzaldehyde (**3a**, Acros, 98%), acetophenone (**3b**, Alfa, 99%), methyl isonicotinate (TCI, >99%), and *p*-anisaldehyde (Alfa, 98%) were distilled under argon. Filtration and column chromatography were performed using Merck 230–400-mesh silica gel 60 Å (0.040–0.063 mm). The following reagents were recrystallized from the indicated solvents prior to use: benzophenone (**1a**, Alfa, petroleum ether), 4,4'-dimethylbenzophenone (**1b**, Alfa, petroleum ether), 4,4'-dimethoxybenzophenone (**1c**, TCI, Et<sub>2</sub>O), 4,4'-difluorobenzophenone (**1d**, Alfa, EtOH), 4,4'-dichlorobenzophenone (**1e**, TCI, Et<sub>2</sub>O), 4,4'-dibromobenzophenone (**1f**, Alfa, CH<sub>2</sub>Cl<sub>2</sub>/hexanes), 2,2'-dichlorobenzophenone (**1g**, Alfa, MeOH), 4-fluoro-4'-methoxybenzophenone (**1h**, Alfa, CH<sub>2</sub>Cl<sub>2</sub>/hexanes), di-2-thienylketone (**1j**, Alfa, CH<sub>2</sub>Cl<sub>2</sub>/hexanes), 9-fluorenone (**1k**, TCI, MeOH/CH<sub>2</sub>Cl<sub>2</sub>), 2,7-dibromo-9-fluorenone (**1l**, TCI, CH<sub>2</sub>Cl<sub>2</sub>/hexanes), xanthone (**1m**, TCI, EtOH), 4-cyanopyridine (TCI, Et<sub>2</sub>O), and 4-phenylpyridine (Acros, Et<sub>2</sub>O). B<sub>2</sub>pin<sub>2</sub> (Alfa, 98+%), KHF<sub>2</sub> (Alfa, 98%), and Mg (Junsei, 98%) were used without further purification. Solvents and reagents for recrystallization, work-up and chromatography were petroleum ether (Daejung, Extra Pure), MeOH (Duksan, Extra Pure), EtOH (Duksan, Extra Pure), CH<sub>2</sub>Cl<sub>2</sub> (Duksan, Extra Pure), EtOAc (Duksan, Extra Pure), Et<sub>2</sub>O (Daejung, Extra Pure), hexanes (Duksan, Extra Pure), MgSO<sub>4</sub> (Duksan, 99.0%), and Na<sub>2</sub>SO<sub>4</sub> (Duksan, 99.0%). <sup>1</sup>H and <sup>13</sup>C NMR spectra were recorded on a JEOL ECS400 spectrometer (400 MHz, <sup>1</sup>H; 100 MHz, <sup>13</sup>C). Chemical shifts are referenced to residual chloroform (7.26 ppm, <sup>1</sup>H; 77.23 ppm, <sup>13</sup>C), dichloromethane (5.32 ppm, <sup>1</sup>H; 53.84 ppm, <sup>13</sup>C), acetone (2.05 ppm, <sup>1</sup>H), and acetonitrile (1.94 ppm, <sup>1</sup>H; 1.32 ppm, <sup>13</sup>C). Chemical shifts are reported in ppm, and multiplicities are indicated by s (singlet), d (doublet), t (triplet), q (quartet), m (multiplet), and br (broad). Coupling constants, *J*, are reported in Hertz. Analytical thin-layer chromatography was conducted on Merck silica gel 60 F<sub>254</sub> TLC plates. Visualization was accomplished with UV (254 nm and 365 nm) and a KMnO<sub>4</sub> staining solution. High resolution electrospray ionization mass spectrometry (ESI-HRMS) was performed on a Thermo Scientific LTQ Orbitrap XL spectrometer at Environmental OMICS Laboratory, GIST. High resolution fast atom bombardment mass spectrometry (FAB-HRMS) was performed on a JEOL JMS-700 spectrometer at Korea Basic Science Institute (KBSI), Daegu Center. High resolution field desorption mass spectrometry (FD-HRMS) was performed on a JEOL JMS-T200GC spectrometer at CNU Center for Research Facilities at Chonnam National University. Data are reported in the form of *m/z*.

## 2. Experimental Procedures

### 2.1. Boryl Radical-Promoted Pinacol Coupling of Diaryl Ketones

#### 2.1.1. Homocoupling

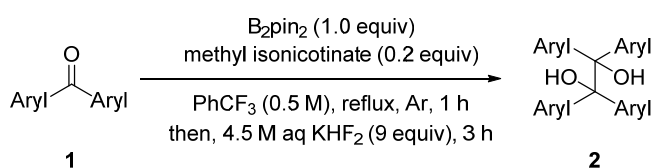

To a solution of ketone (**1**, 1.00 mmol) and B<sub>2</sub>pin<sub>2</sub> (254 mg, 1.00 mmol) in PhCF<sub>3</sub> (1 mL) was added methyl isonicotinate (24 μL, 0.20 mmol) at room temperature under argon, and the mixture was refluxed for 1 hour. The reaction mixture was cooled to room temperature, transferred to a vial with CH<sub>2</sub>Cl<sub>2</sub> (3 mL), and stirred with 4.5 M aq KHF<sub>2</sub> (2 mL) at room temperature under air. After 3 hours, the mixture was poured into water (20 mL) and extracted with CH<sub>2</sub>Cl<sub>2</sub> (20 mL) four times. The combined organic layers were dried over Na<sub>2</sub>SO<sub>4</sub> (6–12 g), filtered, and concentrated under reduced pressure. The crude material was adsorbed to SiO<sub>2</sub> and purified by column chromatography (SiO<sub>2</sub>, φ: 2.5 cm, l: 15 cm) to afford the diol (**2**). **2a–e** and **2m** have been fully characterized in the literature.<sup>1</sup> Copies of <sup>1</sup>H NMR spectra are attached at the end of the ESI.

**Data for 2f:**

<sup>1</sup>H NMR: (400 MHz, CDCl<sub>3</sub>) δ 7.34–7.30 (m, 8H), 7.15–7.12 (m, 8H), 2.82 (brs, 2H).

<sup>13</sup>C{<sup>1</sup>H} NMR: (100 MHz, CDCl<sub>3</sub>) δ 142.6, 130.9, 130.4, 122.0, 82.7.

HRMS (ESI): [M–OH]<sup>+</sup> calcd for C<sub>26</sub>H<sub>17</sub>Br<sub>4</sub>O: 660.8013; found: 660.8010.

**Data for 2h:**

HRMS (ESI): [M–OH]<sup>+</sup> calcd for C<sub>28</sub>H<sub>23</sub>F<sub>2</sub>O<sub>3</sub>: 445.1615; found: 445.1631.

(<sup>1</sup>H and <sup>13</sup>C{<sup>1</sup>H} NMR data were reported in the literature.<sup>2</sup>)

**Data for 2i:**

<sup>1</sup>H NMR: (400 MHz, CD<sub>3</sub>Cl) δ 7.50–7.43 (m, 8H), 7.12–7.10 (m, 4H), 6.73–6.70 (m, 4H), 3.76 (s, 6H), 2.91 (brs, 2H); the other diastereomer: δ 7.68–7.66 (m, 4H), 7.43–7.40 (m, 4H), 6.95–6.92 (m, 4H), 6.75–6.73 (m, 4H), 3.78 (s, 6H), 2.96 (brs, 2H)

<sup>13</sup>C{<sup>1</sup>H} NMR: (100 MHz, CD<sub>3</sub>Cl) δ 158.9, 148.7, 135.4, 129.7, 129.213, 129.209 (q, *J* = 32.2), 124.34 (q, *J* = 3.6), 124.33 (q, *J* = 272.0), 113.2, 83.0, 55.4; the other diastereomer: δ 159.2, 148.5, 134.9, 129.8, 129.1, 129.0 (q, *J* = 32.4), 124.5 (q, *J* = 3.6), 124.3 (q, *J* = 272.0), 113.2, 82.9, 55.4.

HRMS (FD): [M]<sup>+</sup> calcd for C<sub>30</sub>H<sub>24</sub>F<sub>6</sub>O<sub>4</sub>: 562.1579; found: 562.1577.

**Data for 2j:**

<sup>13</sup>C{<sup>1</sup>H} NMR: (100 MHz, CD<sub>3</sub>CN) δ 148.8, 127.9, 126.9, 126.7, 83.0.

HRMS (FAB): [M–OH]<sup>+</sup> calcd for C<sub>18</sub>H<sub>13</sub>OS<sub>4</sub>: 372.9849; found: 372.9851.

(<sup>1</sup>H NMR data were reported in the literature.<sup>3</sup>)

**Data for 2k:**

HRMS (FAB): [M–OH]<sup>+</sup> calcd for C<sub>26</sub>H<sub>17</sub>O: 345.1279; found: 345.1277.

(<sup>1</sup>H and <sup>13</sup>C{<sup>1</sup>H} NMR data were reported in the literature.<sup>4</sup>)

**Data for 2l:**

<sup>1</sup>H NMR: (400 MHz, CD<sub>2</sub>Cl<sub>2</sub>) δ 7.45–7.29 (m, 10H), 3.35 (s, 2H).

<sup>13</sup>C{<sup>1</sup>H} NMR: (100 MHz, CD<sub>2</sub>Cl<sub>2</sub>) δ 146.5, 138.9, 133.0, 129.0, 121.6, 121.3, 86.5.

HRMS (ESI): [M–OH]<sup>+</sup> calcd for C<sub>26</sub>H<sub>13</sub>Br<sub>4</sub>O: 656.7700; found: 656.7702.

## 2.1.2. Heterocoupling

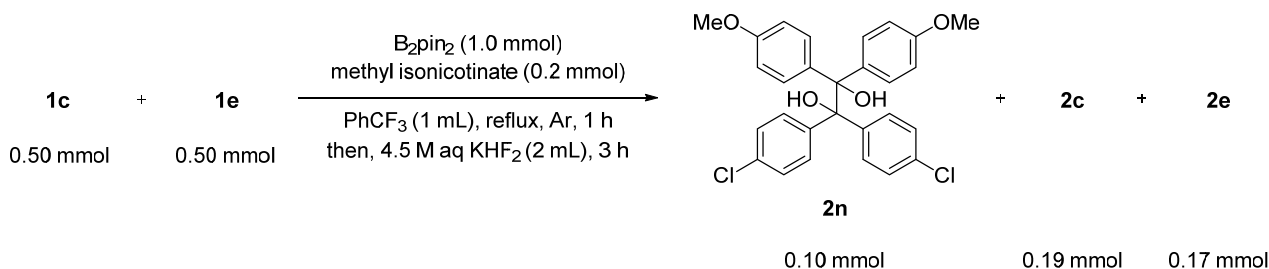

To a solution of **1c** (121 mg, 0.500 mmol), **1d** (126 mg, 0.500 mmol), and  $B_2pin_2$  (254 mg, 1.00 mmol) in  $PhCF_3$  (1 mL) was added methyl isonicotinate (24  $\mu$ L, 0.20 mmol) at room temperature under argon, and the mixture was refluxed for 1 hour. The reaction mixture was cooled to room temperature, transferred to a vial with  $CH_2Cl_2$  (3 mL), and stirred with 4.5 M aq  $KHF_2$  (2 mL) at room temperature under air. After 3 hours, the mixture was poured into water (20 mL) and extracted with  $CH_2Cl_2$  (20 mL) four times. The combined organic layers were dried over  $Na_2SO_4$  (6 g), filtered, and concentrated under reduced pressure. The crude material was adsorbed to  $SiO_2$  and purified by column chromatography ( $SiO_2$ ,  $\phi$ : 2.5 cm,  $l$ : 18 cm, EtOAc:hexanes = 1:15  $\rightarrow$  1:6  $\rightarrow$  1:3) to afford the diols, **2n** ( $R_f$  = 0.2 in EtOAc/hexanes = 1:7, off-white solid, 47 mg, 0.10 mmol), **2c** ( $R_f$  = 0.1 in EtOAc/hexanes = 1:7, off-white solid, 93 mg, 0.19 mmol), and **2e** ( $R_f$  = 0.5 in EtOAc/hexanes = 1:7, white solid, 87 mg, 0.17 mmol).

Data for **2n**:

$^1H$  NMR: (400 MHz,  $CDCl_3$ )  $\delta$  7.30–7.26 (m, 4H), 7.15–7.09 (m, 8H), 6.72 (m, 4H), 3.77 (s, 6H), 2.86 (m, 2H).

$^{13}C\{^1H\}$  NMR: (100 MHz,  $CDCl_3$ )  $\delta$  158.8, 142.9, 136.1, 133.0, 130.1, 130.0, 127.5, 113.0, 83.2, 82.3, 55.4.

HRMS (FAB):  $[M-OH]^+$  calcd for  $C_{28}H_{23}^{35}Cl_2O_3$ ,  $C_{28}H_{23}^{35}Cl^{37}ClO_3$ : 477.1024, 479.0995; found: 477.1028, 479.0921.

## 2.2. Boryl Radical-Promoted Pinacol Coupling of Benzaldehyde and Acetophenone

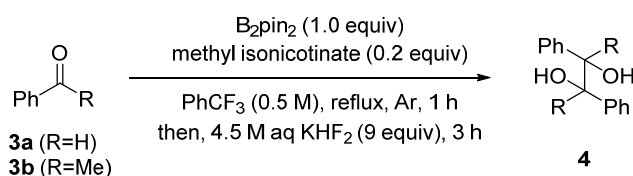

To a solution of carbonyl compound (**3**, 1.00 mmol) and  $B_2pin_2$  (254 mg, 1.00 mmol) in  $PhCF_3$  (1 mL) was added methyl isonicotinate (24  $\mu$ L, 0.20 mmol) at room temperature under argon, and the mixture was refluxed for 48 hours. The reaction mixture was cooled to room temperature, transferred to a vial with  $CH_2Cl_2$  (3 mL), and stirred with 4.5 M aq  $KHF_2$  (2 mL) at room temperature under air. After 3 hours, the mixture was poured into water (20 mL) and extracted with  $CH_2Cl_2$  (20 mL) four times. The combined organic layers were dried over  $Na_2SO_4$  (6 g), filtered, and concentrated under reduced pressure. The crude material was adsorbed to  $SiO_2$  and purified by column chromatography ( $SiO_2$ ,  $\phi$ : 2 cm,  $l$ : 15 cm) to afford the diol (**4a**: yellow solid, 52 mg, 49%; **4b**: white solid, 9 mg, 7%) as a mixture of diastereomers.

### 2.3. Preparation of 4-Methoxy-4'-(trifluoromethyl)benzophenone<sup>5</sup>

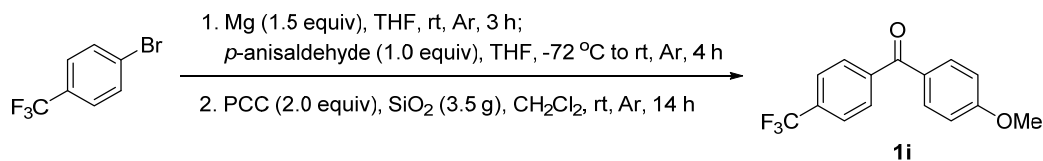

To a mixture of Mg (365 mg, 15.0 mmol) in THF (20 mL) was added 4-bromobenzotrifluoride (1.4 mL, 10 mmol) at room temperature under argon. After 3 hours, the solution was added to a solution of *p*-anisaldehyde (1.2 mL, 10 mmol) in THF (10 mL) dropwise at  $-72$  °C, and the reaction mixture was stirred at room temperature. After 4 hours, the reaction mixture was quenched by sat. aq  $\text{NH}_4\text{Cl}$  (45 mL), diluted with  $\text{Et}_2\text{O}$  (45 mL), and the organic layer was separated. The aqueous layer was extracted with  $\text{Et}_2\text{O}$  (45 mL). The combined organic layers were dried over  $\text{MgSO}_4$  (6 g), filtered, and concentrated under reduced pressure. To a mixture of PCC (4.3 g, 20 mmol) and  $\text{SiO}_2$  (3.5 g) in  $\text{CH}_2\text{Cl}_2$  (10 mL) was added a solution of the crude material (3.0 g) in  $\text{CH}_2\text{Cl}_2$  (3 mL). The flask containing the remaining crude material was rinsed twice with  $\text{CH}_2\text{Cl}_2$  (3 mL and 4 mL). The reaction mixture was stirred at room temperature for 14 hours. The reaction mixture was filtered by  $\text{SiO}_2$  ( $\phi$ : 2.5 cm,  $l$ : 3 cm,  $\text{CH}_2\text{Cl}_2$ ) and concentrated under reduced pressure. The crude material was purified by precipitation from  $\text{CH}_2\text{Cl}_2$ /hexanes to afford 4-methoxy-4'-(trifluoromethyl)benzophenone (**1i**) as a white solid in 79% yield (2.2 g, 7.9 mmol).

#### Data for **1i**:

HRMS (FD):  $[\text{M}]^+$  calcd for  $\text{C}_{15}\text{H}_{11}\text{F}_3\text{O}_2$ : 280.0711; found: 280.0703.

( $^1\text{H}$  and  $^{13}\text{C}\{^1\text{H}\}$  NMR data were reported in the literature.<sup>5</sup>)

### 3. DFT Calculation

Conformation around the B–O(carbonyl) bond in the  $\text{PhCOPh-Bpin-PyCN}$  complex was analyzed, and then approximate transition structures for the benzophenone ketyl radical formation were obtained by the PM6 semi-empirical Hamiltonian using MOPAC 2016.<sup>6</sup> These saddle points were refined by DFT calculation at the UM062X/6-31G(d,p) level of theory<sup>7</sup> using the Gaussian 16 suite of programs<sup>8</sup>. A phenyl ring in these structures were replaced by a methyl group, and then saddle point optimizations were performed for the acetophenone ketyl radical formation. These transition structures were verified by the presence of a single negative frequency as well as the Intrinsic Reaction Coordinate (IRC) calculation at the same level of theory. The reactant and the product from the IRC calculation were further optimized to give the ground state structures which have no imaginary frequency. All the reported energy values are obtained after thermal free energy correction. The 3-D illustrations were produced using CYLview 1.0b.<sup>9</sup>

#### 3.1. Benzophenone Ketyl Radical Formation

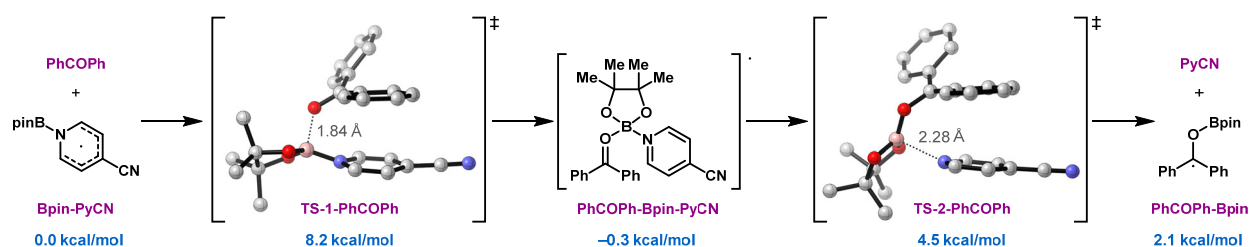

- computed data for **PhCOPh + Bpin-PyCN**

: total free energy = -1327.535200 Hartree

: relative free energy = 0.00 kcal/mol

: no imaginary frequency

: Cartesian coordinates

| Atom | X           | Y           | Z           |
|------|-------------|-------------|-------------|
| B    | -1.76615900 | -0.82630100 | -0.57247300 |
| N    | -0.43931900 | -1.15944800 | -1.04063900 |
| O    | -0.52830600 | 0.73168500  | 1.33888800  |
| C    | 0.65227300  | 0.97126500  | 1.12894200  |
| C    | 1.03138000  | 2.29704600  | 0.54931900  |
| C    | 1.68507300  | -0.06290400 | 1.43907700  |
| C    | 0.18898100  | -2.33935600 | -0.64757400 |
| C    | 1.45713600  | -2.63207900 | -1.02611500 |
| C    | 2.19733700  | -1.72177900 | -1.84152600 |
| C    | 0.27245900  | -0.26195400 | -1.83388200 |
| C    | 1.54360800  | -0.51743800 | -2.23437300 |
| H    | 2.06291400  | 0.21148300  | -2.84553600 |
| H    | -0.26391900 | 0.63805100  | -2.10579700 |
| H    | -0.40670000 | -2.98531300 | -0.01541700 |
| H    | 1.91616900  | -3.55127200 | -0.68289500 |
| O    | -2.53556300 | -1.69784100 | 0.14172000  |
| O    | -2.37475500 | 0.35437600  | -0.89371600 |
| C    | -3.75548900 | 0.22642500  | -0.48115900 |
| C    | -3.71010700 | -0.95761300 | 0.55581700  |
| C    | -3.46870200 | -0.49827300 | 1.99103000  |
| H    | -2.59648300 | 0.15424100  | 2.05241900  |
| H    | -3.28293300 | -1.38124200 | 2.60797200  |
| H    | -4.34372000 | 0.02295300  | 2.38922600  |
| C    | -4.91035500 | -1.88973300 | 0.49724500  |
| H    | -5.01423500 | -2.35215100 | -0.48517300 |
| H    | -5.82904000 | -1.34265000 | 0.73084100  |
| H    | -4.78782500 | -2.68288900 | 1.23854300  |
| C    | -4.19997200 | 1.55633400  | 0.10469500  |
| H    | -3.51672900 | 1.87752800  | 0.89267500  |
| H    | -5.21204400 | 1.47984400  | 0.51400400  |
| H    | -4.20515800 | 2.31631200  | -0.68094700 |
| C    | -4.55461700 | -0.10794000 | -1.73807300 |
| H    | -4.22221700 | -1.05551600 | -2.17138300 |
| H    | -4.39250000 | 0.68040100  | -2.47672900 |
| H    | -5.62516000 | -0.17480700 | -1.52723000 |
| C    | 3.55631300  | -1.95521500 | -2.15293800 |
| N    | 4.68398900  | -2.13546600 | -2.38118100 |
| C    | 0.08403300  | 2.93481600  | -0.26047300 |
| C    | 0.36076900  | 4.18286500  | -0.80240300 |
| C    | 1.57150900  | 4.81447700  | -0.51660400 |
| C    | 2.50333500  | 4.19694500  | 0.31266500  |
| C    | 2.23848700  | 2.93664900  | 0.84208400  |

|   |             |             |             |
|---|-------------|-------------|-------------|
| H | 2.95826500  | 2.46110100  | 1.50055700  |
| H | -0.85845000 | 2.42675900  | -0.45102600 |
| H | -0.36738800 | 4.66988500  | -1.44286700 |
| H | 1.78466900  | 5.79262200  | -0.93592400 |
| H | 3.43680400  | 4.69642500  | 0.54970700  |
| C | 1.33716900  | -1.06195900 | 2.35771600  |
| C | 2.92460100  | -0.11921000 | 0.79623500  |
| C | 3.80899400  | -1.16012900 | 1.07119300  |
| C | 2.22418100  | -2.08933100 | 2.64202600  |
| C | 3.46081200  | -2.14017300 | 1.99534500  |
| H | 4.75158300  | -1.21992200 | 0.53703100  |
| H | 4.15080600  | -2.95084500 | 2.20754800  |
| H | 0.35957300  | -1.01433500 | 2.82658600  |
| H | 1.95423300  | -2.85674600 | 3.36028000  |
| H | 3.18134500  | 0.61981600  | 0.04387700  |

- computed data for **TS-1-PhCOPh**

: total free energy = -1327.522067 Hartree

: relative free energy = 8.2 kcal/mol

: a single imaginary frequency at -231.60 cm<sup>-1</sup>

: Cartesian coordinates

| Atom | X           | Y           | Z           |
|------|-------------|-------------|-------------|
| B    | 1.57472300  | 0.30384500  | -0.30861100 |
| N    | 0.46660300  | 1.06145000  | -0.98551100 |
| O    | 0.55998000  | -0.98214100 | 0.53305000  |
| C    | -0.67731700 | -1.03861400 | 0.70960100  |
| C    | -1.36861500 | -2.29093400 | 0.33943100  |
| C    | -1.38390300 | 0.11012000  | 1.30650400  |
| C    | 0.07505100  | 2.30532100  | -0.53625700 |
| C    | -1.11897200 | 2.85594600  | -0.88135500 |
| C    | -2.02441900 | 2.12573600  | -1.71001500 |
| C    | -0.36339500 | 0.38621400  | -1.85854600 |
| C    | -1.58075900 | 0.88123700  | -2.22454900 |
| H    | -2.20934800 | 0.31100500  | -2.89866700 |
| H    | 0.02170600  | -0.55822900 | -2.22552200 |
| H    | 0.77967600  | 2.78982600  | 0.12843100  |
| H    | -1.39298000 | 3.83078800  | -0.49733700 |
| O    | 2.30510100  | 0.99747100  | 0.65434600  |
| O    | 2.38151800  | -0.54041500 | -1.07858300 |
| C    | 3.73850600  | -0.23458800 | -0.71845500 |
| C    | 3.58269200  | 0.33692100  | 0.72962700  |
| C    | 3.48510700  | -0.76509400 | 1.78454700  |
| H    | 2.75288400  | -1.52139500 | 1.49127100  |
| H    | 3.16110900  | -0.31752900 | 2.72823000  |
| H    | 4.45327800  | -1.24784000 | 1.94589400  |
| C    | 4.63531800  | 1.35951300  | 1.12669100  |
| H    | 4.60688000  | 2.23054900  | 0.47020400  |

|   |             |             |             |
|---|-------------|-------------|-------------|
| H | 5.63594300  | 0.91734500  | 1.08597000  |
| H | 4.45222700  | 1.69541300  | 2.15067700  |
| C | 4.57345000  | -1.50169000 | -0.81239400 |
| H | 4.12633100  | -2.30954000 | -0.23119900 |
| H | 5.59077100  | -1.32250200 | -0.44945300 |
| H | 4.63443600  | -1.82235600 | -1.85553900 |
| C | 4.24786900  | 0.81667700  | -1.70476800 |
| H | 3.66496500  | 1.73857800  | -1.61908400 |
| H | 4.12860900  | 0.42988700  | -2.71953400 |
| H | 5.30372100  | 1.04999700  | -1.54035200 |
| C | -3.33729100 | 2.59926200  | -1.95594100 |
| N | -4.42334300 | 2.97941300  | -2.12973300 |
| C | -0.72808100 | -3.14687000 | -0.56985900 |
| C | -1.32564900 | -4.34257400 | -0.93830100 |
| C | -2.55559500 | -4.70731000 | -0.38795300 |
| C | -3.18214200 | -3.87629000 | 0.53723800  |
| C | -2.59387200 | -2.67041600 | 0.90261400  |
| H | -3.07009200 | -2.03571900 | 1.64214000  |
| H | 0.23772300  | -2.84900100 | -0.96794800 |
| H | -0.83434000 | -4.99624700 | -1.65126500 |
| H | -3.02034100 | -5.64512900 | -0.67473200 |
| H | -4.12767700 | -4.17032400 | 0.98017800  |
| C | -0.66777100 | 0.91954900  | 2.20363600  |
| C | -2.69151800 | 0.45809100  | 0.94412800  |
| C | -3.27343200 | 1.60849900  | 1.46637000  |
| C | -1.26426500 | 2.04846300  | 2.74292800  |
| C | -2.56320000 | 2.39839900  | 2.36714600  |
| H | -4.26821000 | 1.90031100  | 1.14632800  |
| H | -3.02068200 | 3.29477200  | 2.77385700  |
| H | 0.35905300  | 0.65726200  | 2.44058300  |
| H | -0.71518100 | 2.66871000  | 3.44362800  |
| H | -3.22649200 | -0.13662700 | 0.21010300  |

- computed data for **PhCOPh-Bpin-PyCN**

: total free energy = -1327.535659 Hartree

: relative free energy = -0.3 kcal/mol

: no imaginary frequency

: Cartesian coordinates

| Atom | X           | Y           | Z           |
|------|-------------|-------------|-------------|
| B    | -1.40465400 | -0.10703500 | 0.27907900  |
| N    | -0.23430600 | -0.94456600 | -0.58154600 |
| O    | -0.64918400 | 0.82334700  | 1.11256000  |
| C    | 0.64177600  | 1.17354500  | 0.97036800  |
| C    | 0.91663400  | 2.45682600  | 0.36776400  |
| C    | 1.62705000  | 0.21185100  | 1.43258500  |
| C    | 0.21457600  | -2.11710300 | -0.12406800 |
| C    | 1.34272800  | -2.71732600 | -0.66330800 |



|   |             |             |             |
|---|-------------|-------------|-------------|
| C | 2.00379200  | -2.05819800 | -1.69970500 |
| C | 0.37340600  | -0.31872200 | -1.59718900 |
| C | 1.50622900  | -0.84877900 | -2.19179000 |
| H | 2.00197300  | -0.32721300 | -3.00060100 |
| H | -0.07412200 | 0.62288300  | -1.90046800 |
| H | -0.35598000 | -2.53858700 | 0.69596500  |
| H | 1.71447000  | -3.65300600 | -0.26620300 |
| O | -2.16321500 | -1.08384700 | 0.98665200  |
| O | -2.25046900 | 0.54859200  | -0.66884600 |
| C | -3.46067000 | -0.20818500 | -0.74352400 |
| C | -3.54058200 | -0.83524000 | 0.68641300  |
| C | -4.07178800 | 0.15942200  | 1.71949400  |
| H | -3.53518200 | 1.10937700  | 1.64379300  |
| H | -3.89947000 | -0.25108400 | 2.71738800  |
| H | -5.14332800 | 0.34206200  | 1.59561900  |
| C | -4.31184200 | -2.14401200 | 0.76357200  |
| H | -3.84983000 | -2.91247300 | 0.14066700  |
| H | -5.34826300 | -2.00339800 | 0.43980100  |
| H | -4.32310000 | -2.50238300 | 1.79628300  |
| C | -4.60607200 | 0.73141300  | -1.08994900 |
| H | -4.62485000 | 1.58601100  | -0.41201700 |
| H | -5.56767300 | 0.21073600  | -1.03383700 |
| H | -4.47938400 | 1.10611000  | -2.10936900 |
| C | -3.30778700 | -1.27342500 | -1.83278300 |
| H | -2.54080700 | -2.00525200 | -1.56163400 |
| H | -3.00589100 | -0.78305600 | -2.76250700 |
| H | -4.24562100 | -1.80766200 | -2.01040000 |
| C | 3.21206300  | -2.61732300 | -2.25092000 |
| N | 4.18510700  | -3.06300200 | -2.68835900 |
| C | -0.10401100 | 3.09734700  | -0.37244000 |
| C | 0.12952200  | 4.32209900  | -0.97981200 |
| C | 1.36764900  | 4.95400500  | -0.85653000 |
| C | 2.37089900  | 4.35031200  | -0.09800400 |
| C | 2.15316600  | 3.12379700  | 0.51174700  |
| H | 2.92641000  | 2.69173100  | 1.13773900  |
| H | -1.07158500 | 2.61038900  | -0.45720000 |
| H | -0.66374300 | 4.79364500  | -1.55185600 |
| H | 1.54359400  | 5.91342000  | -1.33159800 |
| H | 3.32636100  | 4.84893800  | 0.03243800  |
| C | 1.23912600  | -0.74613100 | 2.39623700  |
| C | 2.91287400  | 0.09321300  | 0.86333300  |
| C | 3.76389200  | -0.93810900 | 1.23934800  |
| C | 2.10294000  | -1.76253100 | 2.77767100  |
| C | 3.36793800  | -1.87203900 | 2.19770700  |
| H | 4.73900000  | -1.02409900 | 0.76910100  |
| H | 4.03907400  | -2.67278400 | 2.49040900  |
| H | 0.24217500  | -0.67373100 | 2.82030100  |
| H | 1.78709900  | -2.47971100 | 3.52945500  |
| H | 3.21823500  | 0.78231400  | 0.08243100  |

- computed data for **TS-2-PhCOPh**

: total free energy = -1327.528030 Hartree

: relative free energy = 4.5 kcal/mol

: a single imaginary frequency at -103.80 cm<sup>-1</sup>

: Cartesian coordinates

| Atom | X           | Y           | Z           |
|------|-------------|-------------|-------------|
| B    | -1.49764700 | -0.36442300 | 0.66270900  |
| N    | 0.26599300  | -1.45766100 | -0.27136800 |
| O    | -0.70537500 | 0.56237900  | 1.32406300  |
| C    | 0.24379700  | 1.37108100  | 0.77117000  |
| C    | -0.15726400 | 2.59790800  | 0.13713200  |
| C    | 1.61417600  | 0.97972100  | 1.08864800  |
| C    | 1.17285600  | -2.10652900 | 0.45735800  |
| C    | 2.45430000  | -2.38073700 | -0.00598800 |
| C    | 2.78546600  | -1.95250400 | -1.29150400 |
| C    | 0.58209500  | -1.06252100 | -1.50568800 |
| C    | 1.83189700  | -1.29145500 | -2.06831400 |
| H    | 2.06867700  | -0.94818500 | -3.06818600 |
| H    | -0.20097500 | -0.52769300 | -2.03750400 |
| H    | 0.86109400  | -2.39469800 | 1.45762500  |
| H    | 3.18217700  | -2.88126300 | 0.62062600  |
| O    | -2.12733000 | -1.33114200 | 1.41553000  |
| O    | -2.10710200 | -0.15529900 | -0.56843400 |
| C    | -3.35061700 | -0.88069400 | -0.53678600 |
| C    | -3.09378500 | -1.96965100 | 0.56523100  |
| C    | -4.31730600 | -2.31832600 | 1.40106600  |
| H    | -4.69203300 | -1.44666400 | 1.93914300  |
| H    | -4.04905300 | -3.08231900 | 2.13500700  |
| H    | -5.11647400 | -2.71702900 | 0.76789700  |
| C    | -2.46994200 | -3.24930700 | 0.00890700  |
| H    | -1.61367100 | -3.02785500 | -0.63030200 |
| H    | -3.20008400 | -3.82989700 | -0.56220500 |
| H    | -2.12281700 | -3.85741600 | 0.84845800  |
| C    | -4.43279700 | 0.12128100  | -0.13431200 |
| H    | -4.23338100 | 0.52589500  | 0.86288200  |
| H    | -5.42789500 | -0.33182700 | -0.13560900 |
| H    | -4.42511600 | 0.94882800  | -0.84888800 |
| C    | -3.63539600 | -1.43481100 | -1.92355700 |
| H    | -2.80151100 | -2.03824200 | -2.28679500 |
| H    | -3.79234800 | -0.60857700 | -2.62165300 |
| H    | -4.53902500 | -2.05249800 | -1.91415900 |
| C    | 4.11898800  | -2.15706300 | -1.79793600 |
| N    | 5.19288900  | -2.31018300 | -2.19917900 |
| C    | -1.52001600 | 2.84525600  | -0.15044400 |
| C    | -1.91813800 | 4.02920200  | -0.74929800 |
| C    | -0.98547900 | 5.01487700  | -1.07248800 |
| C    | 0.35804400  | 4.80512800  | -0.76142800 |
| C    | 0.76962800  | 3.62671900  | -0.15992400 |

|   |             |             |             |
|---|-------------|-------------|-------------|
| H | 1.80986500  | 3.51221500  | 0.12019200  |
| H | -2.25518000 | 2.09057800  | 0.09327700  |
| H | -2.97064900 | 4.18772600  | -0.96392900 |
| H | -1.30247600 | 5.93948100  | -1.54307000 |
| H | 1.09119600  | 5.57701800  | -0.97367700 |
| C | 1.87524900  | 0.31521900  | 2.30352100  |
| C | 2.68396900  | 1.17244500  | 0.19564300  |
| C | 3.96411700  | 0.73174300  | 0.51289800  |
| C | 3.15807500  | -0.10888000 | 2.62073800  |
| C | 4.21060500  | 0.09388500  | 1.72729100  |
| H | 4.77083700  | 0.87095000  | -0.20054800 |
| H | 5.21195400  | -0.24472100 | 1.97239000  |
| H | 1.05083000  | 0.14617800  | 2.98834900  |
| H | 3.33986000  | -0.60226600 | 3.57075500  |
| H | 2.49559300  | 1.62987700  | -0.77069900 |

- computed data for **PhCOPh-Bpin + PyCN**

: total free energy = -1327.531922 Hartree

: relative free energy = 2.1 kcal/mol

: no imaginary frequency

: Cartesian coordinates

| Atom | X           | Y           | Z           |
|------|-------------|-------------|-------------|
| B    | -1.78140200 | -0.17949700 | 0.79059700  |
| N    | 0.45615400  | -1.73925200 | -0.27949600 |
| O    | -0.87621100 | 0.61722300  | 1.43241800  |
| C    | 0.16401500  | 1.31316200  | 0.88084900  |
| C    | -0.11496700 | 2.54948400  | 0.19216100  |
| C    | 1.47480800  | 0.82648700  | 1.27938600  |
| C    | 1.47655100  | -2.35731300 | 0.31755600  |
| C    | 2.75660500  | -2.42363900 | -0.22090300 |
| C    | 2.97481400  | -1.81063100 | -1.45481000 |
| C    | 0.67898100  | -1.15474200 | -1.45951200 |
| C    | 1.91686600  | -1.16527700 | -2.09484200 |
| H    | 2.05987100  | -0.67362500 | -3.04982300 |
| H    | -0.17307000 | -0.64178200 | -1.89682500 |
| H    | 1.26582300  | -2.81096000 | 1.28209800  |
| H    | 3.56321200  | -2.91523700 | 0.30926000  |
| O    | -2.64157100 | -0.96102500 | 1.51372300  |
| O    | -2.02956100 | -0.18786500 | -0.56189700 |
| C    | -3.27357800 | -0.89555900 | -0.74803700 |
| C    | -3.38478500 | -1.75045500 | 0.56393900  |
| C    | -4.80392900 | -1.93011500 | 1.08042600  |
| H    | -5.27015000 | -0.97177400 | 1.31309100  |
| H    | -4.78322500 | -2.53020000 | 1.99318000  |
| H    | -5.41738400 | -2.45353900 | 0.34017500  |
| C    | -2.68412300 | -3.10288500 | 0.45691900  |
| H    | -1.65970100 | -2.97495500 | 0.09819300  |

|   |             |             |             |
|---|-------------|-------------|-------------|
| H | -3.22306000 | -3.78015100 | -0.21162600 |
| H | -2.64887000 | -3.55251700 | 1.45232800  |
| C | -4.36596000 | 0.16613400  | -0.86029000 |
| H | -4.43761200 | 0.74821200  | 0.06387300  |
| H | -5.34260300 | -0.27925700 | -1.06768400 |
| H | -4.11064000 | 0.84681700  | -1.67670500 |
| C | -3.18271000 | -1.70888300 | -2.02855100 |
| H | -2.30631500 | -2.35969600 | -2.01628400 |
| H | -3.10306700 | -1.03463000 | -2.88549100 |
| H | -4.07860700 | -2.32386400 | -2.15900000 |
| C | 4.29199100  | -1.80848800 | -2.03886100 |
| N | 5.35328900  | -1.79605500 | -2.49890700 |
| C | -1.42124700 | 2.85145200  | -0.25587800 |
| C | -1.69704800 | 4.04476500  | -0.90402300 |
| C | -0.69313900 | 4.98831200  | -1.11863700 |
| C | 0.59348800  | 4.72631000  | -0.64960300 |
| C | 0.88088600  | 3.53670800  | 0.00104300  |
| H | 1.87326600  | 3.38463000  | 0.40734900  |
| H | -2.21723000 | 2.13424800  | -0.10807500 |
| H | -2.70897400 | 4.24221800  | -1.24415700 |
| H | -0.91386300 | 5.92057700  | -1.62742900 |
| H | 1.37823700  | 5.46581900  | -0.77404700 |
| C | 1.60430000  | 0.08345100  | 2.47100100  |
| C | 2.62771000  | 1.02208100  | 0.49380600  |
| C | 3.86155400  | 0.53396900  | 0.90614000  |
| C | 2.84143600  | -0.39437400 | 2.87919300  |
| C | 3.97952600  | -0.16812900 | 2.10468500  |
| H | 4.73320500  | 0.68515900  | 0.27608000  |
| H | 4.94605500  | -0.54223500 | 2.42624200  |
| H | 0.71909800  | -0.09490900 | 3.07118400  |
| H | 2.92024500  | -0.94523800 | 3.81153800  |
| H | 2.54275100  | 1.52389900  | -0.46452000 |

### 3.2. Acetophenone Ketyl Radical Formation

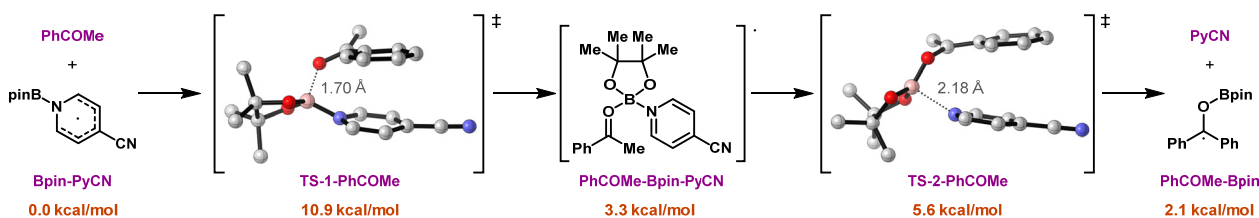

- computed data for PhCOMe + Bpin-PyCN

: total free energy = -1135.917877 Hartree

: relative free energy = 0.00 kcal/mol

: no imaginary frequency

: Cartesian coordinates

| Atom | X           | Y           | Z           |
|------|-------------|-------------|-------------|
| B    | 1.39722900  | -0.67889200 | -0.38357700 |
| N    | 0.02591200  | -1.12166900 | -0.50732900 |
| O    | 0.46291700  | 0.87922600  | 1.91015000  |
| C    | -0.75326800 | 0.86226500  | 1.98643500  |
| C    | -1.43959900 | 0.29868100  | 3.20987900  |
| C    | -1.59405400 | 1.40055500  | 0.87311400  |
| C    | -0.76881500 | -0.71362100 | -1.57734700 |
| C    | -2.08768900 | -1.01589200 | -1.64298300 |
| C    | -2.71164000 | -1.76149800 | -0.59590000 |
| C    | -0.55764800 | -1.89187200 | 0.49602100  |
| C    | -1.87773500 | -2.20849800 | 0.47186500  |
| H    | -2.29553000 | -2.80307800 | 1.27645500  |
| H    | 0.11469600  | -2.19478500 | 1.28917500  |
| H    | -0.25716800 | -0.12588900 | -2.32863300 |
| H    | -2.67365500 | -0.66138500 | -2.48216900 |
| O    | 1.97294100  | 0.17661600  | -1.28158900 |
| O    | 2.22726200  | -1.13203300 | 0.59787900  |
| C    | 3.55201300  | -0.66571500 | 0.25453700  |
| C    | 3.25938100  | 0.53485500  | -0.71605400 |
| C    | 3.06799800  | 1.86060300  | 0.01561900  |
| H    | 2.33489700  | 1.75713300  | 0.81986800  |
| H    | 2.70128100  | 2.60131600  | -0.70058200 |
| H    | 4.01188900  | 2.22347400  | 0.43152800  |
| C    | 4.26065500  | 0.69111900  | -1.84889000 |
| H    | 4.29744700  | -0.19909200 | -2.47820500 |
| H    | 5.26085200  | 0.88339500  | -1.44824800 |
| H    | 3.97352700  | 1.54112500  | -2.47246700 |
| C    | 4.27005500  | -0.27823100 | 1.53643700  |
| H    | 3.66827800  | 0.41928100  | 2.12070700  |
| H    | 5.23919700  | 0.17854600  | 1.31252000  |
| H    | 4.44369900  | -1.17220600 | 2.14026700  |
| C    | 4.26103300  | -1.82883900 | -0.43467900 |
| H    | 3.74322400  | -2.11240800 | -1.35553600 |
| H    | 4.25766500  | -2.68936800 | 0.23810600  |
| H    | 5.29715200  | -1.57869700 | -0.67769800 |
| C    | -4.11006200 | -1.96686900 | -0.57648300 |
| N    | -5.26538100 | -2.11020500 | -0.55130700 |
| C    | -0.96225600 | 2.12493100  | -0.14422100 |
| C    | -2.97113000 | 1.17757400  | 0.80939400  |
| C    | -3.70964400 | 1.66196600  | -0.26711000 |
| C    | -1.70214300 | 2.62697200  | -1.20584100 |
| C    | -3.07611400 | 2.39093500  | -1.26985200 |
| H    | -4.77356000 | 1.45731900  | -0.32509400 |
| H    | -3.65338300 | 2.77365000  | -2.10582400 |
| H    | 0.11243200  | 2.27028100  | -0.08840900 |
| H    | -1.21050600 | 3.19381100  | -1.98998100 |
| H    | -3.47252300 | 0.60066700  | 1.58058400  |

|   |             |             |            |
|---|-------------|-------------|------------|
| H | -0.68013300 | 0.01700100  | 3.93794400 |
| H | -2.02672700 | -0.58234700 | 2.93464600 |
| H | -2.12389600 | 1.03284700  | 3.64419800 |

- computed data for **TS-1-PhCOMe**

: total free energy = -1135.900509 Hartree

: relative free energy = 10.9 kcal/mol

: a single imaginary frequency at -279.01 cm<sup>-1</sup>

: Cartesian coordinates

| Atom | X           | Y           | Z           |
|------|-------------|-------------|-------------|
| B    | 1.25535500  | -0.28260300 | 0.20850100  |
| N    | 0.01515300  | -1.09770400 | -0.18605000 |
| O    | 0.61183600  | 0.63779900  | 1.48529800  |
| C    | -0.59184200 | 0.89123500  | 1.76331000  |
| C    | -1.02158000 | 0.76536000  | 3.19624700  |
| C    | -1.51139300 | 1.39435900  | 0.74324500  |
| C    | -0.66017800 | -0.83882600 | -1.35350200 |
| C    | -1.97174200 | -1.16318700 | -1.52764700 |
| C    | -2.69543300 | -1.76278600 | -0.45397200 |
| C    | -0.65042300 | -1.76962900 | 0.81594100  |
| C    | -1.97300100 | -2.10472800 | 0.71025800  |
| H    | -2.46372300 | -2.61912400 | 1.52899000  |
| H    | -0.05115600 | -2.01103400 | 1.68696900  |
| H    | -0.07781500 | -0.32001700 | -2.10565300 |
| H    | -2.46778200 | -0.92766900 | -2.46083200 |
| O    | 1.75410600  | 0.52767400  | -0.82957900 |
| O    | 2.29948700  | -0.97587400 | 0.85045700  |
| C    | 3.46809500  | -0.78514200 | 0.04482000  |
| C    | 3.17702500  | 0.59071300  | -0.63546000 |
| C    | 3.47533300  | 1.76907900  | 0.29206000  |
| H    | 3.02120200  | 1.61053500  | 1.27410200  |
| H    | 3.04880600  | 2.67628900  | -0.14500600 |
| H    | 4.55148900  | 1.91898800  | 0.41787400  |
| C    | 3.84614800  | 0.79126100  | -1.98560900 |
| H    | 3.51329600  | 0.04083800  | -2.70462500 |
| H    | 4.93488700  | 0.73027300  | -1.88874600 |
| H    | 3.59360100  | 1.77949100  | -2.37916300 |
| C    | 4.69572500  | -0.80095900 | 0.94227500  |
| H    | 4.58608500  | -0.09489900 | 1.76679400  |
| H    | 5.59615400  | -0.54791900 | 0.37288400  |
| H    | 4.82761800  | -1.80073200 | 1.36392500  |
| C    | 3.53350900  | -1.92751600 | -0.97023800 |
| H    | 2.67030900  | -1.89574500 | -1.64200600 |
| H    | 3.51001600  | -2.87612400 | -0.42860400 |
| H    | 4.44819500  | -1.88834800 | -1.56894300 |
| C    | -4.09784000 | -1.97069500 | -0.53503800 |
| N    | -5.25016500 | -2.11436700 | -0.59372300 |

|   |             |            |             |
|---|-------------|------------|-------------|
| C | -0.97674500 | 2.07274700 | -0.36822200 |
| C | -2.89647100 | 1.19047700 | 0.83316000  |
| C | -3.72893500 | 1.61138600 | -0.19705200 |
| C | -1.81780300 | 2.51943700 | -1.37365900 |
| C | -3.19095700 | 2.27176800 | -1.29961500 |
| H | -4.79280600 | 1.40559900 | -0.14713500 |
| H | -3.84441500 | 2.60018100 | -2.10155000 |
| H | 0.09777800  | 2.21344000 | -0.43229900 |
| H | -1.40625400 | 3.04827900 | -2.22697600 |
| H | -3.31973700 | 0.65790600 | 1.67902700  |
| H | -0.20044900 | 0.35132600 | 3.78005800  |
| H | -1.89724200 | 0.11692700 | 3.28603700  |
| H | -1.30212000 | 1.74615600 | 3.59357900  |

- computed data for **PhCOMe-Bpin-PyCN**

: total free energy = -1135.912639 Hartree

: relative free energy = 3.3 kcal/mol

: no imaginary frequency

: Cartesian coordinates

| Atom | X           | Y           | Z           |
|------|-------------|-------------|-------------|
| B    | 1.28647000  | 0.19690600  | -0.39105000 |
| N    | -0.00840900 | -0.82709500 | 0.02557800  |
| O    | 0.59487000  | 1.27846400  | -1.06452700 |
| C    | -0.18916400 | 2.09623400  | -0.32375500 |
| C    | 0.49783000  | 3.10803200  | 0.53647500  |
| C    | -1.60131200 | 1.91605600  | -0.38729500 |
| C    | -0.44282700 | -1.71514100 | -0.87439500 |
| C    | -1.64900800 | -2.37464900 | -0.71258600 |
| C    | -2.42356700 | -2.06466300 | 0.40889700  |
| C    | -0.71505900 | -0.56453700 | 1.12887800  |
| C    | -1.94899400 | -1.15598200 | 1.35427200  |
| H    | -2.53414600 | -0.90044100 | 2.22841400  |
| H    | -0.26539000 | 0.14803600  | 1.81211000  |
| H    | 0.21111500  | -1.85620600 | -1.72911700 |
| H    | -1.99473600 | -3.08889200 | -1.44916400 |
| O    | 2.15991700  | -0.51975500 | -1.24592400 |
| O    | 1.94172100  | 0.47749200  | 0.84996600  |
| C    | 3.33244900  | 0.22106200  | 0.62868200  |
| C    | 3.29098700  | -0.90239600 | -0.45815700 |
| C    | 4.51610400  | -0.96052300 | -1.35820300 |
| H    | 4.62482000  | -0.03478500 | -1.92502900 |
| H    | 4.41198400  | -1.78480100 | -2.06895200 |
| H    | 5.42406300  | -1.12836800 | -0.76957800 |
| C    | 3.01900000  | -2.27977900 | 0.15226000  |
| H    | 2.18318000  | -2.23602300 | 0.85717000  |
| H    | 3.89501100  | -2.66995800 | 0.67836700  |
| H    | 2.76153500  | -2.97550200 | -0.65160300 |

|   |             |             |             |
|---|-------------|-------------|-------------|
| C | 3.97056500  | 1.50658000  | 0.09906100  |
| H | 3.52162000  | 1.78763200  | -0.85835900 |
| H | 5.05165500  | 1.40182600  | -0.03133600 |
| H | 3.78317600  | 2.30932500  | 0.81755800  |
| C | 3.97888400  | -0.18901800 | 1.94297800  |
| H | 3.43624100  | -1.01344400 | 2.40910600  |
| H | 3.97291200  | 0.65786000  | 2.63438600  |
| H | 5.01869300  | -0.49368200 | 1.78559300  |
| C | -3.71643100 | -2.67668200 | 0.58214800  |
| N | -4.75348000 | -3.16948300 | 0.71778100  |
| C | -2.17338300 | 1.04258300  | -1.34930700 |
| C | -2.47886100 | 2.52305500  | 0.54864600  |
| C | -3.83296100 | 2.22988600  | 0.54609800  |
| C | -3.52887400 | 0.76325600  | -1.34077700 |
| C | -4.37289400 | 1.34048600  | -0.38679600 |
| H | -4.47933400 | 2.69436600  | 1.28489400  |
| H | -5.43275700 | 1.11092300  | -0.37886500 |
| H | -1.52046700 | 0.60618200  | -2.09764400 |
| H | -3.94069600 | 0.08898300  | -2.08700200 |
| H | -2.07924700 | 3.19604100  | 1.30069300  |
| H | -0.11964000 | 3.99671400  | 0.68718300  |
| H | 1.42916000  | 3.40459200  | 0.04733300  |
| H | 0.77516100  | 2.69836900  | 1.51671300  |

- computed data for **TS-2-PhCOMe**

: total free energy = -1135.908922 Hartree

: relative free energy = 5.6 kcal/mol

: a single imaginary frequency at -133.23 cm<sup>-1</sup>

: Cartesian coordinates

| Atom | X           | Y           | Z           |
|------|-------------|-------------|-------------|
| B    | 1.51725300  | -0.39918800 | 0.50765000  |
| N    | -0.00998300 | 1.01082300  | -0.13349500 |
| O    | 0.57628400  | -1.23928500 | 1.09708800  |
| C    | -0.20684900 | -2.04675200 | 0.32733300  |
| C    | 0.46339900  | -3.06095600 | -0.54143100 |
| C    | -1.61410800 | -1.85203400 | 0.40694000  |
| C    | -0.53030600 | 1.84761900  | 0.76538700  |
| C    | -1.81093100 | 2.36916700  | 0.64664700  |
| C    | -2.58037500 | 1.96656100  | -0.44813000 |
| C    | -0.73249200 | 0.65962000  | -1.19614700 |
| C    | -2.03513200 | 1.10234900  | -1.39671200 |
| H    | -2.61809900 | 0.76486900  | -2.24477900 |
| H    | -0.24780800 | -0.02415600 | -1.88896000 |
| H    | 0.10863300  | 2.07911500  | 1.61411900  |
| H    | -2.21543400 | 3.04131600  | 1.39372900  |
| O    | 2.31815200  | 0.38130000  | 1.31951200  |
| O    | 2.08351900  | -0.64288800 | -0.74162900 |



|   |             |             |             |
|---|-------------|-------------|-------------|
| C | 3.44718700  | -0.19124200 | -0.65518900 |
| C | 3.38720700  | 0.87482800  | 0.49381200  |
| C | 4.64953800  | 0.96065400  | 1.33929700  |
| H | 4.85526500  | 0.01347200  | 1.83960800  |
| H | 4.52298600  | 1.73006400  | 2.10513600  |
| H | 5.51110300  | 1.23149500  | 0.72045700  |
| C | 3.00508000  | 2.26641600  | -0.01039500 |
| H | 2.12591100  | 2.22438500  | -0.65639100 |
| H | 3.82912200  | 2.72820200  | -0.56173700 |
| H | 2.77172400  | 2.89678400  | 0.85223100  |
| C | 4.29240400  | -1.40862200 | -0.27995600 |
| H | 3.99297100  | -1.79831300 | 0.69770500  |
| H | 5.35930300  | -1.17060900 | -0.25151400 |
| H | 4.12814300  | -2.19035000 | -1.02598900 |
| C | 3.87712200  | 0.35493000  | -2.00715100 |
| H | 3.18816200  | 1.12447900  | -2.35904100 |
| H | 3.89099700  | -0.45518800 | -2.74080100 |
| H | 4.88386900  | 0.78079700  | -1.94887400 |
| C | -3.94314300 | 2.41688100  | -0.57786400 |
| N | -5.03777100 | 2.77684500  | -0.67616700 |
| C | -2.17285300 | -0.98114400 | 1.37588500  |
| C | -2.49741000 | -2.45903300 | -0.52153200 |
| C | -3.85278900 | -2.17198200 | -0.50184800 |
| C | -3.53067000 | -0.71148800 | 1.38708700  |
| C | -4.38346100 | -1.28994300 | 0.44284100  |
| H | -4.50625000 | -2.63447200 | -1.23543700 |
| H | -5.44357300 | -1.06131200 | 0.44749900  |
| H | -1.51149100 | -0.52978000 | 2.10714500  |
| H | -3.93534800 | -0.03559300 | 2.13550300  |
| H | -2.10284400 | -3.12737600 | -1.28049500 |
| H | -0.13789700 | -3.97113800 | -0.61296000 |
| H | 1.43568100  | -3.31458600 | -0.11315200 |
| H | 0.65074600  | -2.68784100 | -1.55664100 |

- computed data for **PhCOMe-Bpin + PyCN**

: total free energy = -1135.914516 Hartree

: relative free energy = 2.1 kcal/mol

: no imaginary frequency

: Cartesian coordinates

| Atom | X           | Y           | Z           |
|------|-------------|-------------|-------------|
| B    | 1.79839000  | 0.68014900  | -0.55875900 |
| N    | -0.12151900 | -1.53822100 | 0.01990700  |
| O    | 0.68943200  | 1.35119300  | -0.99524000 |
| C    | -0.18888800 | 1.94814000  | -0.13549000 |
| C    | 0.36222700  | 2.80338700  | 0.95769400  |
| C    | -1.56988400 | 1.72792900  | -0.38141400 |
| C    | -0.92697000 | -2.22411600 | -0.79604400 |

|   |             |             |             |
|---|-------------|-------------|-------------|
| C | -2.29375900 | -2.35913100 | -0.59164900 |
| C | -2.85202000 | -1.73022100 | 0.52360600  |
| C | -0.66471300 | -0.96058000 | 1.09191900  |
| C | -2.02386700 | -1.02105900 | 1.39067900  |
| H | -2.43042800 | -0.51287100 | 2.25663500  |
| H | 0.02344500  | -0.40683900 | 1.72623500  |
| H | -0.45373300 | -2.68405700 | -1.65995000 |
| H | -2.91333100 | -2.91640800 | -1.28419400 |
| O | 2.75000100  | 0.23034500  | -1.42995100 |
| O | 2.09907400  | 0.45869400  | 0.76457700  |
| C | 3.45748900  | -0.02914900 | 0.79827400  |
| C | 3.66445600  | -0.57706600 | -0.65913300 |
| C | 5.06842100  | -0.38403200 | -1.21048800 |
| H | 5.34281800  | 0.67112200  | -1.24833700 |
| H | 5.11668000  | -0.78622500 | -2.22514800 |
| H | 5.79815700  | -0.91918000 | -0.59458200 |
| C | 3.22521900  | -2.03057500 | -0.81877000 |
| H | 2.21123700  | -2.16771700 | -0.43423900 |
| H | 3.90776300  | -2.71180400 | -0.30279000 |
| H | 3.22978400  | -2.27604000 | -1.88382200 |
| C | 4.34362600  | 1.17397600  | 1.11358500  |
| H | 4.26428700  | 1.93095800  | 0.32747500  |
| H | 5.39322200  | 0.88613200  | 1.21651800  |
| H | 4.00900700  | 1.61951400  | 2.05367800  |
| C | 3.56653900  | -1.07994800 | 1.89046400  |
| H | 2.81242200  | -1.85762800 | 1.75704000  |
| H | 3.41280700  | -0.61156400 | 2.86611600  |
| H | 4.55919500  | -1.54085200 | 1.88444700  |
| C | -4.27151100 | -1.79964600 | 0.76347300  |
| N | -5.41080800 | -1.86091300 | 0.95411300  |
| C | -1.99631100 | 0.98009000  | -1.50722200 |
| C | -2.56199000 | 2.19449000  | 0.51803200  |
| C | -3.90051200 | 1.90768800  | 0.30711300  |
| C | -3.34049700 | 0.71777700  | -1.71192500 |
| C | -4.30504500 | 1.16726000  | -0.80672400 |
| H | -4.64118100 | 2.25880700  | 1.01893800  |
| H | -5.35361900 | 0.93660500  | -0.95908600 |
| H | -1.24870700 | 0.61712100  | -2.20346100 |
| H | -3.64448300 | 0.14262900  | -2.58192700 |
| H | -2.26947200 | 2.75650400  | 1.39939700  |
| H | -0.28613600 | 3.66352900  | 1.14236600  |
| H | 1.35029600  | 3.17374200  | 0.67291200  |
| H | 0.48420500  | 2.25457900  | 1.90045100  |

### 3.3. Comparison between Transition State Conformers

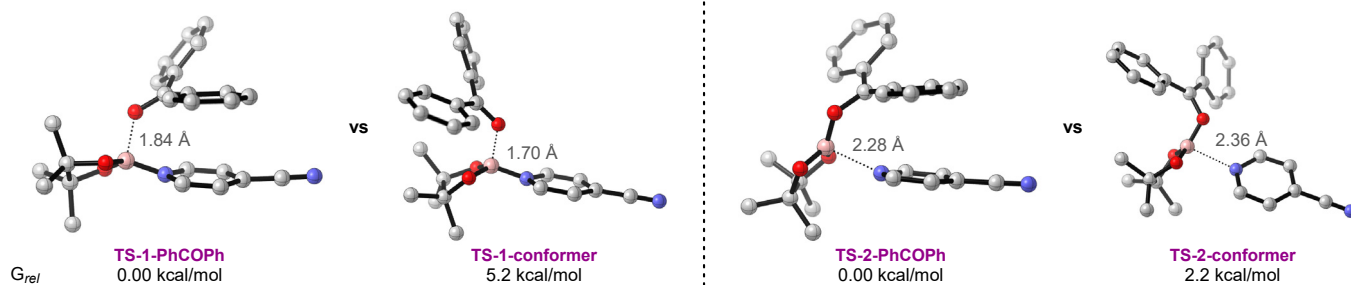

- computed data for **TS-1-conformer**

: total free energy =  $-1327.513830$  Hartree

: relative free energy =  $5.2$  kcal/mol

: a single imaginary frequency at  $-654.30$   $\text{cm}^{-1}$

: Cartesian coordinates

| Atom | X           | Y           | Z           |
|------|-------------|-------------|-------------|
| B    | -0.79736700 | -0.37108500 | 0.52344500  |
| N    | -2.22746800 | -0.00009100 | 0.19345200  |
| O    | 0.01463700  | 0.80115300  | -0.40913800 |
| C    | 1.24325500  | 0.78584200  | -0.69950100 |
| C    | 2.07303600  | 1.88293700  | -0.18458000 |
| C    | 1.79175000  | -0.28998600 | -1.53556400 |
| C    | -2.82701900 | -0.53323300 | -0.92527800 |
| C    | -4.01377800 | -0.06168500 | -1.40261300 |
| C    | -4.66293700 | 1.02097300  | -0.74936200 |
| C    | -2.83987600 | 1.05376500  | 0.83181100  |
| C    | -4.02702200 | 1.56580600  | 0.40196900  |
| H    | -4.48448100 | 2.38710400  | 0.94004100  |
| H    | -2.31526100 | 1.42840700  | 1.70214100  |
| H    | -2.30004200 | -1.36928700 | -1.36940600 |
| H    | -4.46277600 | -0.52014100 | -2.27550800 |
| O    | -0.36228400 | -1.64307600 | 0.10223000  |
| O    | -0.42757000 | -0.14321400 | 1.86959400  |
| C    | 0.35037000  | -1.26791100 | 2.30344400  |
| C    | -0.06972500 | -2.38889400 | 1.28936700  |
| C    | 1.02307600  | -3.39646500 | 0.96427900  |
| H    | 1.87650500  | -2.90636000 | 0.48949600  |
| H    | 0.63264700  | -4.14357100 | 0.26833000  |
| H    | 1.36153500  | -3.91280800 | 1.86846300  |
| C    | -1.35269200 | -3.10562700 | 1.71353900  |
| H    | -2.13844100 | -2.38275400 | 1.95273500  |
| H    | -1.19142000 | -3.75149000 | 2.58123900  |
| H    | -1.69882900 | -3.72151900 | 0.87961100  |
| C    | 1.83255500  | -0.90729200 | 2.20143200  |
| H    | 2.13593500  | -0.75869500 | 1.16191800  |
| H    | 2.46347000  | -1.69196300 | 2.62943700  |

|   |             |             |             |
|---|-------------|-------------|-------------|
| H | 2.01077700  | 0.02174600  | 2.74957700  |
| C | -0.00072300 | -1.56799000 | 3.75444000  |
| H | -1.07838300 | -1.67618900 | 3.88411000  |
| H | 0.33912700  | -0.74601800 | 4.39006500  |
| H | 0.49197800  | -2.48633100 | 4.09025200  |
| C | -5.89517600 | 1.53536600  | -1.22471300 |
| N | -6.90686400 | 1.95667600  | -1.61517400 |
| C | 1.67780000  | 2.48727600  | 1.02020600  |
| C | 2.41910800  | 3.53802700  | 1.54109600  |
| C | 3.53754900  | 4.01278200  | 0.85500600  |
| C | 3.91931200  | 3.43258300  | -0.35371700 |
| C | 3.19605100  | 2.36638300  | -0.87256900 |
| H | 3.47668500  | 1.92802500  | -1.82473700 |
| H | 0.80689900  | 2.09114400  | 1.53510500  |
| H | 2.12506600  | 3.99357300  | 2.48071700  |
| H | 4.10927900  | 4.84138100  | 1.26037200  |
| H | 4.77743600  | 3.81687500  | -0.89462100 |
| C | 3.13453200  | -0.69046900 | -1.44555700 |
| C | 0.92684100  | -0.96257900 | -2.41175000 |
| C | 1.40142400  | -1.99859400 | -3.20062400 |
| C | 3.59883900  | -1.74517800 | -2.22169200 |
| C | 2.73615900  | -2.39376500 | -3.10381800 |
| H | 0.73244500  | -2.50732600 | -3.88623900 |
| H | 3.10318100  | -3.21302300 | -3.71366800 |
| H | 3.79803800  | -0.19932300 | -0.74067800 |
| H | 4.63193300  | -2.06448600 | -2.13612500 |
| H | -0.11066200 | -0.64897900 | -2.46078700 |

- computed data for **TS-2-conformer**

: total free energy = -1327.524611 Hartree

: relative free energy = 2.2 kcal/mol

: a single imaginary frequency at -59.71 cm<sup>-1</sup>

: Cartesian coordinates

| Atom | X           | Y           | Z           |
|------|-------------|-------------|-------------|
| B    | -0.04315500 | -0.70757400 | 0.11340900  |
| N    | -2.29722700 | -0.04104300 | -0.13919600 |
| O    | 0.25981800  | 0.44184100  | -0.60959500 |
| C    | 1.50304400  | 0.99767800  | -0.47833200 |
| C    | 1.56691500  | 2.25321700  | 0.23855600  |
| C    | 2.60173300  | 0.29606800  | -1.09097000 |
| C    | -3.19400000 | -0.94188800 | -0.53928600 |
| C    | -4.48256300 | -0.60378300 | -0.93548300 |
| C    | -4.83685000 | 0.74627000  | -0.91608400 |
| C    | -2.63281100 | 1.24926100  | -0.14690600 |
| C    | -3.89495400 | 1.69727200  | -0.52002400 |
| H    | -4.13924100 | 2.75259700  | -0.51084500 |
| H    | -1.85038200 | 1.94651700  | 0.14103800  |

|   |             |             |             |
|---|-------------|-------------|-------------|
| H | -2.84579100 | -1.97199900 | -0.55593300 |
| H | -5.18888700 | -1.36042800 | -1.25500400 |
| O | -0.29802200 | -1.94867100 | -0.44230000 |
| O | 0.25011800  | -0.77518300 | 1.45794000  |
| C | 0.00284100  | -2.12670700 | 1.88293400  |
| C | 0.12162500  | -2.92181300 | 0.53683000  |
| C | 1.56517800  | -3.29635600 | 0.20293700  |
| H | 2.22552500  | -2.42747800 | 0.28538700  |
| H | 1.60623300  | -3.64701400 | -0.83141600 |
| H | 1.93610100  | -4.08858700 | 0.85928300  |
| C | -0.77662400 | -4.14413500 | 0.44008800  |
| H | -1.82936400 | -3.88016400 | 0.56110500  |
| H | -0.51278700 | -4.87577600 | 1.21028300  |
| H | -0.64820300 | -4.61495800 | -0.53771400 |
| C | 1.03650300  | -2.50537300 | 2.93277100  |
| H | 2.04960400  | -2.31959200 | 2.57419900  |
| H | 0.94186000  | -3.56232500 | 3.20169300  |
| H | 0.87715400  | -1.90710500 | 3.83324800  |
| C | -1.39846600 | -2.17358400 | 2.48819300  |
| H | -2.15848600 | -1.92046000 | 1.74549900  |
| H | -1.45466200 | -1.43686900 | 3.29315700  |
| H | -1.62141400 | -3.16104500 | 2.90196100  |
| C | -6.16117500 | 1.15493000  | -1.31184600 |
| N | -7.22476700 | 1.48133400  | -1.62734700 |
| C | 0.63532500  | 2.51610400  | 1.26403900  |
| C | 0.65487200  | 3.72431100  | 1.94569600  |
| C | 1.59490400  | 4.70328000  | 1.62324400  |
| C | 2.51857600  | 4.45853400  | 0.60787900  |
| C | 2.50799700  | 3.25259000  | -0.07914600 |
| H | 3.20420400  | 3.08808500  | -0.89506900 |
| H | -0.06403200 | 1.73455100  | 1.54510300  |
| H | -0.05962200 | 3.90133900  | 2.74380200  |
| H | 1.60665300  | 5.64778900  | 2.15692700  |
| H | 3.24333000  | 5.22050100  | 0.33874500  |
| C | 3.94567600  | 0.52451900  | -0.71675400 |
| C | 2.34285000  | -0.70578400 | -2.05457100 |
| C | 3.38261300  | -1.42044000 | -2.62978500 |
| C | 4.97507400  | -0.19868500 | -1.29888000 |
| C | 4.70495800  | -1.17163800 | -2.26237200 |
| H | 3.16020000  | -2.17931300 | -3.37379400 |
| H | 5.51510700  | -1.73427300 | -2.71404300 |
| H | 4.16764600  | 1.24637900  | 0.06169100  |
| H | 5.99848400  | -0.01339200 | -0.98789300 |
| H | 1.31573000  | -0.90813800 | -2.33738800 |

#### 4. References

1. Z. Qiu, H. D. M. Pham, J. Li, C.-C. Li, D. J. Castillo-Pazos, R. Z. Khaliullin, and C.-J. Li, *Chem. Sci.*, 2019, **10**, 10937–10943.
2. C. Wang, Y. Pan, and A. Wu, *Tetrahedron*, 2007, **63**, 429–434.
3. T. S. Cantrell, *J. Org. Chem.*, 1977, **42**, 3774–3776.
4. J. J. Eisch, Y. Qian, and M. Singh, *J. Organomet. Chem.*, 1996, **512**, 207–217.
5. Y. Shen, Y. Gu, and R. Martin, *J. Am. Chem. Soc.* 2018, **140**, 12200–12209.
6. Molecular Orbital PACKage 2016, <http://openmopac.net/>, J. J. P. Stewart, Stewart Computational Chemistry, Colorado Springs, CO, USA.
7. (a) Y. Zhao and D. G. Truhlar, *Theor. Chem. Acc.*, 2008, **120**, 215–241; (b) Y. Zhao and D. G. Truhlar, *Acc. Chem. Res.* 2008, **41**, 157–167.
8. Gaussian 16, Revision C.01, M. J. Frisch, G. W. Trucks, H. B. Schlegel, G. E. Scuseria, M. A. Robb, J. R. Cheeseman, G. Scalmani, V. Barone, G. A. Petersson, H. Nakatsuji, X. Li, M. Caricato, A. V. Marenich, J. Bloino, B. G. Janesko, R. Gomperts, B. Mennucci, H. P. Hratchian,; J. V. Ortiz,; A. F. Izmaylov, J. L. Sonnenberg, D. Williams-Young, F. Ding, F. Lipparini, F. Egidi, J. Goings, B. Peng, A. Petrone, T. Henderson, D. Ranasinghe, V. G. Zakrzewski, J. Gao, N. Rega, G. Zheng, W. Liang, M. Hada, M. Ehara, K. Toyota, R. Fukuda, J. Hasegawa, M. Ishida, T. Nakajima, Y. Honda, O. Kitao, H. Nakai, T. Vreven, K. Throssell, J. A. Montgomery, Jr., J. E. Peralta, F. Ogliaro, M. J. Bearpark, J. J. Heyd, E. N. Brothers, K. N. Kudin, V. N. Staroverov, T. A. Keith, R. Kobayashi, J. Normand, K. Raghavachari, A. P. Rendell, J. C. Burant, S. S. Iyengar, J. Tomasi, M. Cossi, J. M. Millam, M. Klene, C. Adamo, R. Cammi, J. W. Ochterski, R. L. Martin, K. Morokuma, O. Farkas, J. B. Foresman, and D. J. Fox, Gaussian, Inc., Wallingford CT, 2019.
9. C. Y. Legault, CYLview 1.0b, Université de Sherbrooke, 2009 (<http://www.cylview.org>)

Filename = OSL\_20201215\_JHJ-08-095\_Proton-1-3.jdf  
Author = OSL  
Sample\_Id = 20201215\_JHJ-08-0995  
Creation\_Time = 15-DEC-2020 11:07:43  
Revision\_Time = 15-DEC-2020 12:31:40

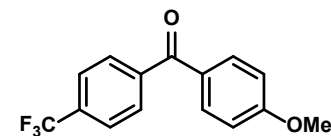

1i

<sup>1</sup>H NMR, CDCl<sub>3</sub>  
400 MHz

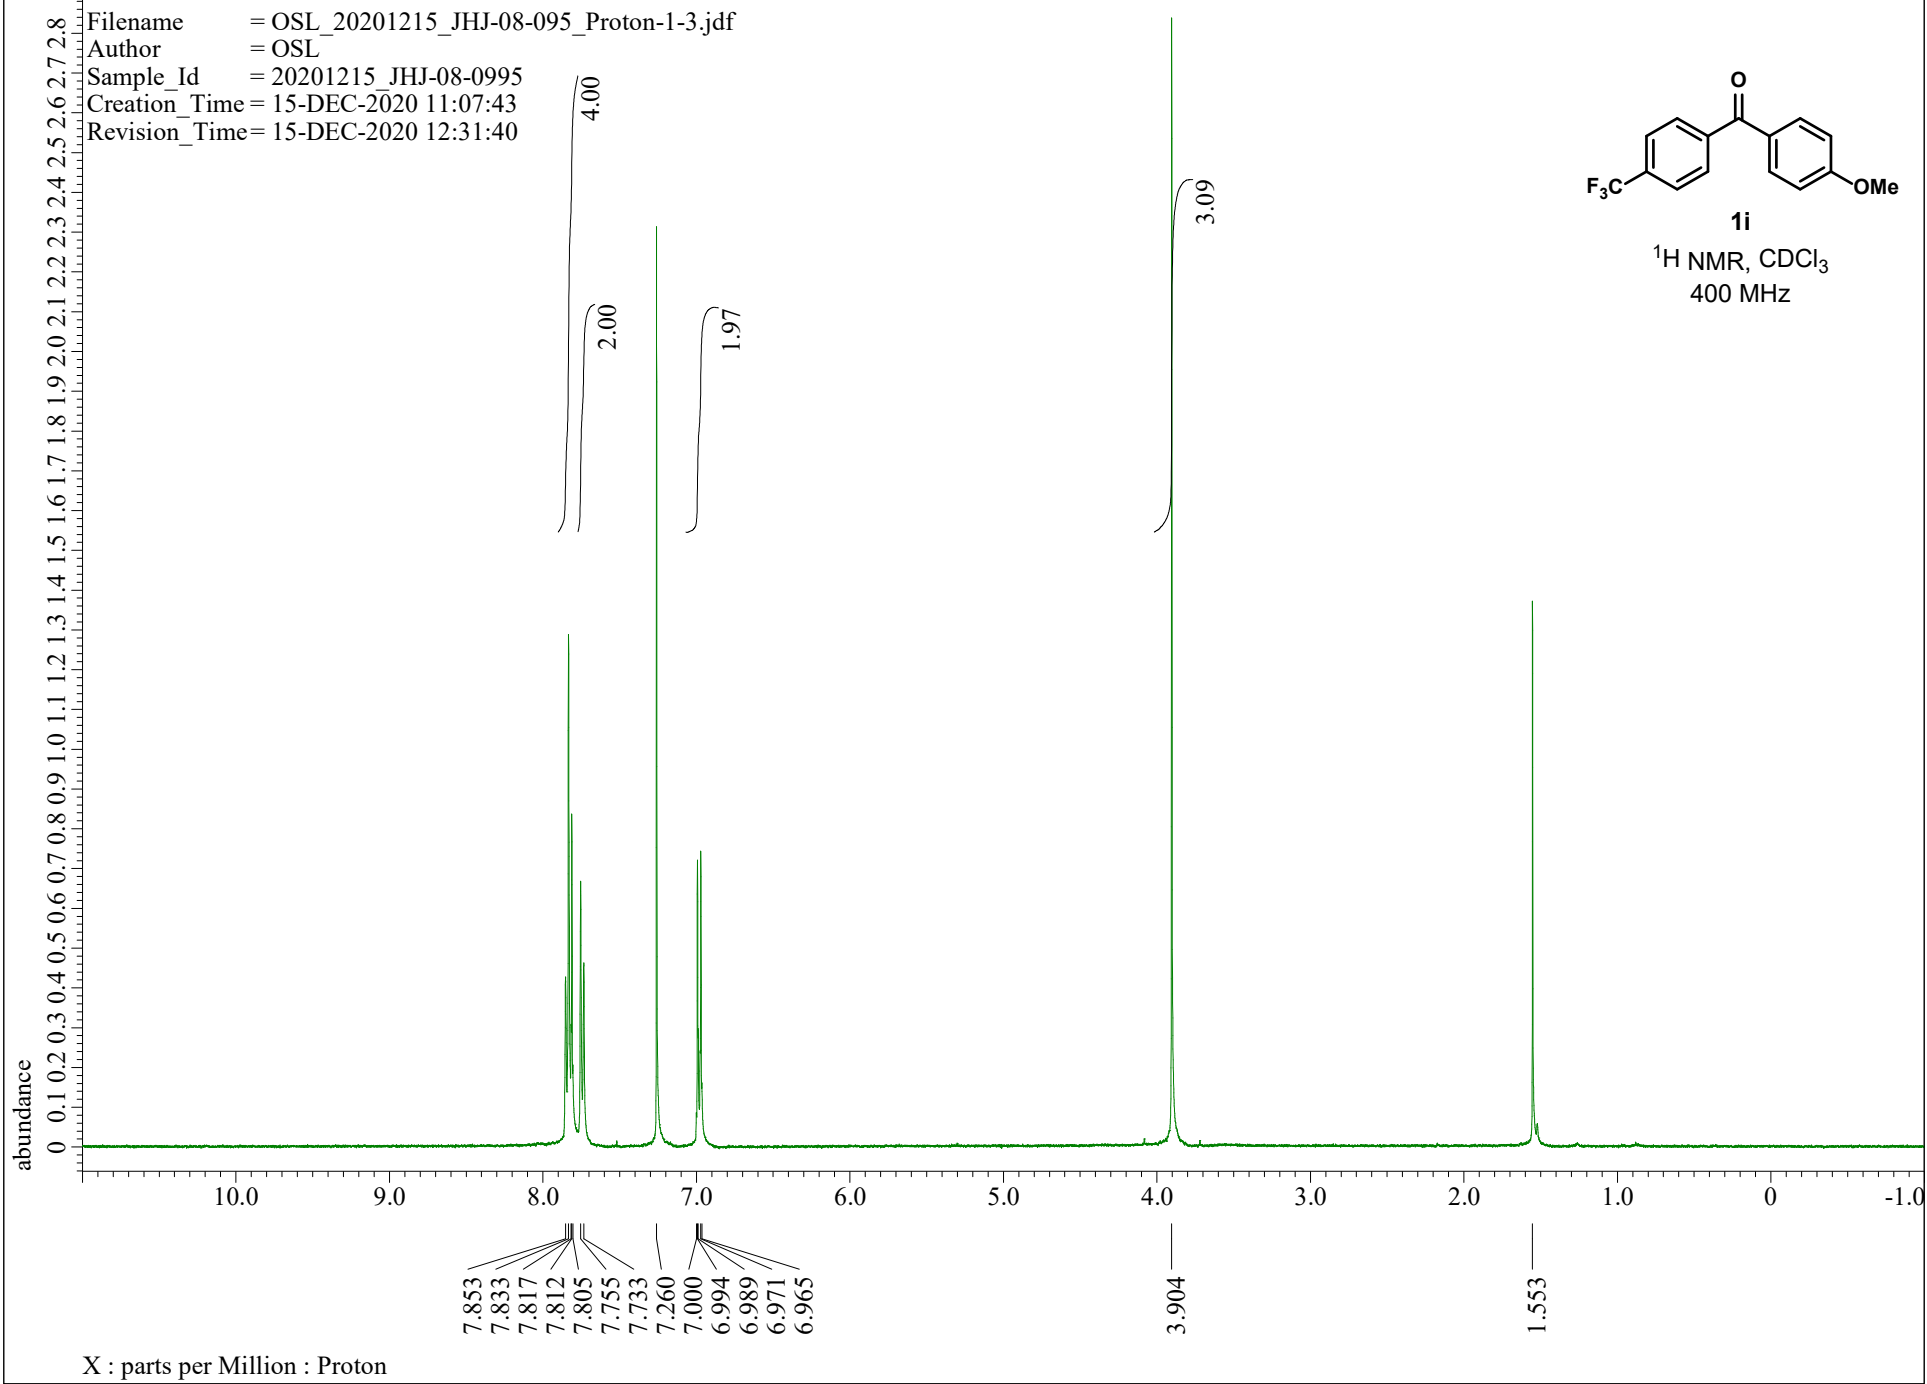

Filename = OSL\_20200916\_JHJ-08-055 column tube 7-9\_Proton-1-6.jdf  
Author = OSL  
Sample\_Id = 20200916\_JHJ-08-055 column tube 7-9  
Creation\_Time = 16-SEP-2020 22:30:26  
Revision\_Time = 18-NOV-2020 14:14:05

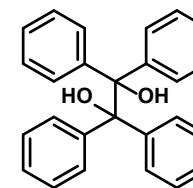

**2a**

<sup>1</sup>H NMR, CDCl<sub>3</sub>  
400 MHz

abundance

7.0  
6.0  
5.0  
4.0  
3.0  
2.0  
1.0  
0

10.0 9.0 8.0 7.0 6.0 5.0 4.0 3.0 2.0 1.0 0 -1.0

7.305  
7.300  
7.292  
7.287  
7.281  
7.260  
7.183  
7.178  
7.169  
7.165  
7.155

8.00  
12.25

2.10

3.029

1.563

X : parts per Million : Proton



Filename = OSL\_20200924\_JHJ-08-059 column tube 16-28\_Proton-1-5.jdf  
Author = OSL  
Sample\_Id = 20200924\_JHJ-08-059 column tube 16-28  
Creation\_Time = 24-SEP-2020 10:58:01  
Revision\_Time = 18-NOV-2020 14:21:20

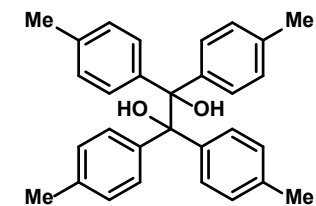

**2b**

<sup>1</sup>H NMR, CDCl<sub>3</sub>  
400 MHz

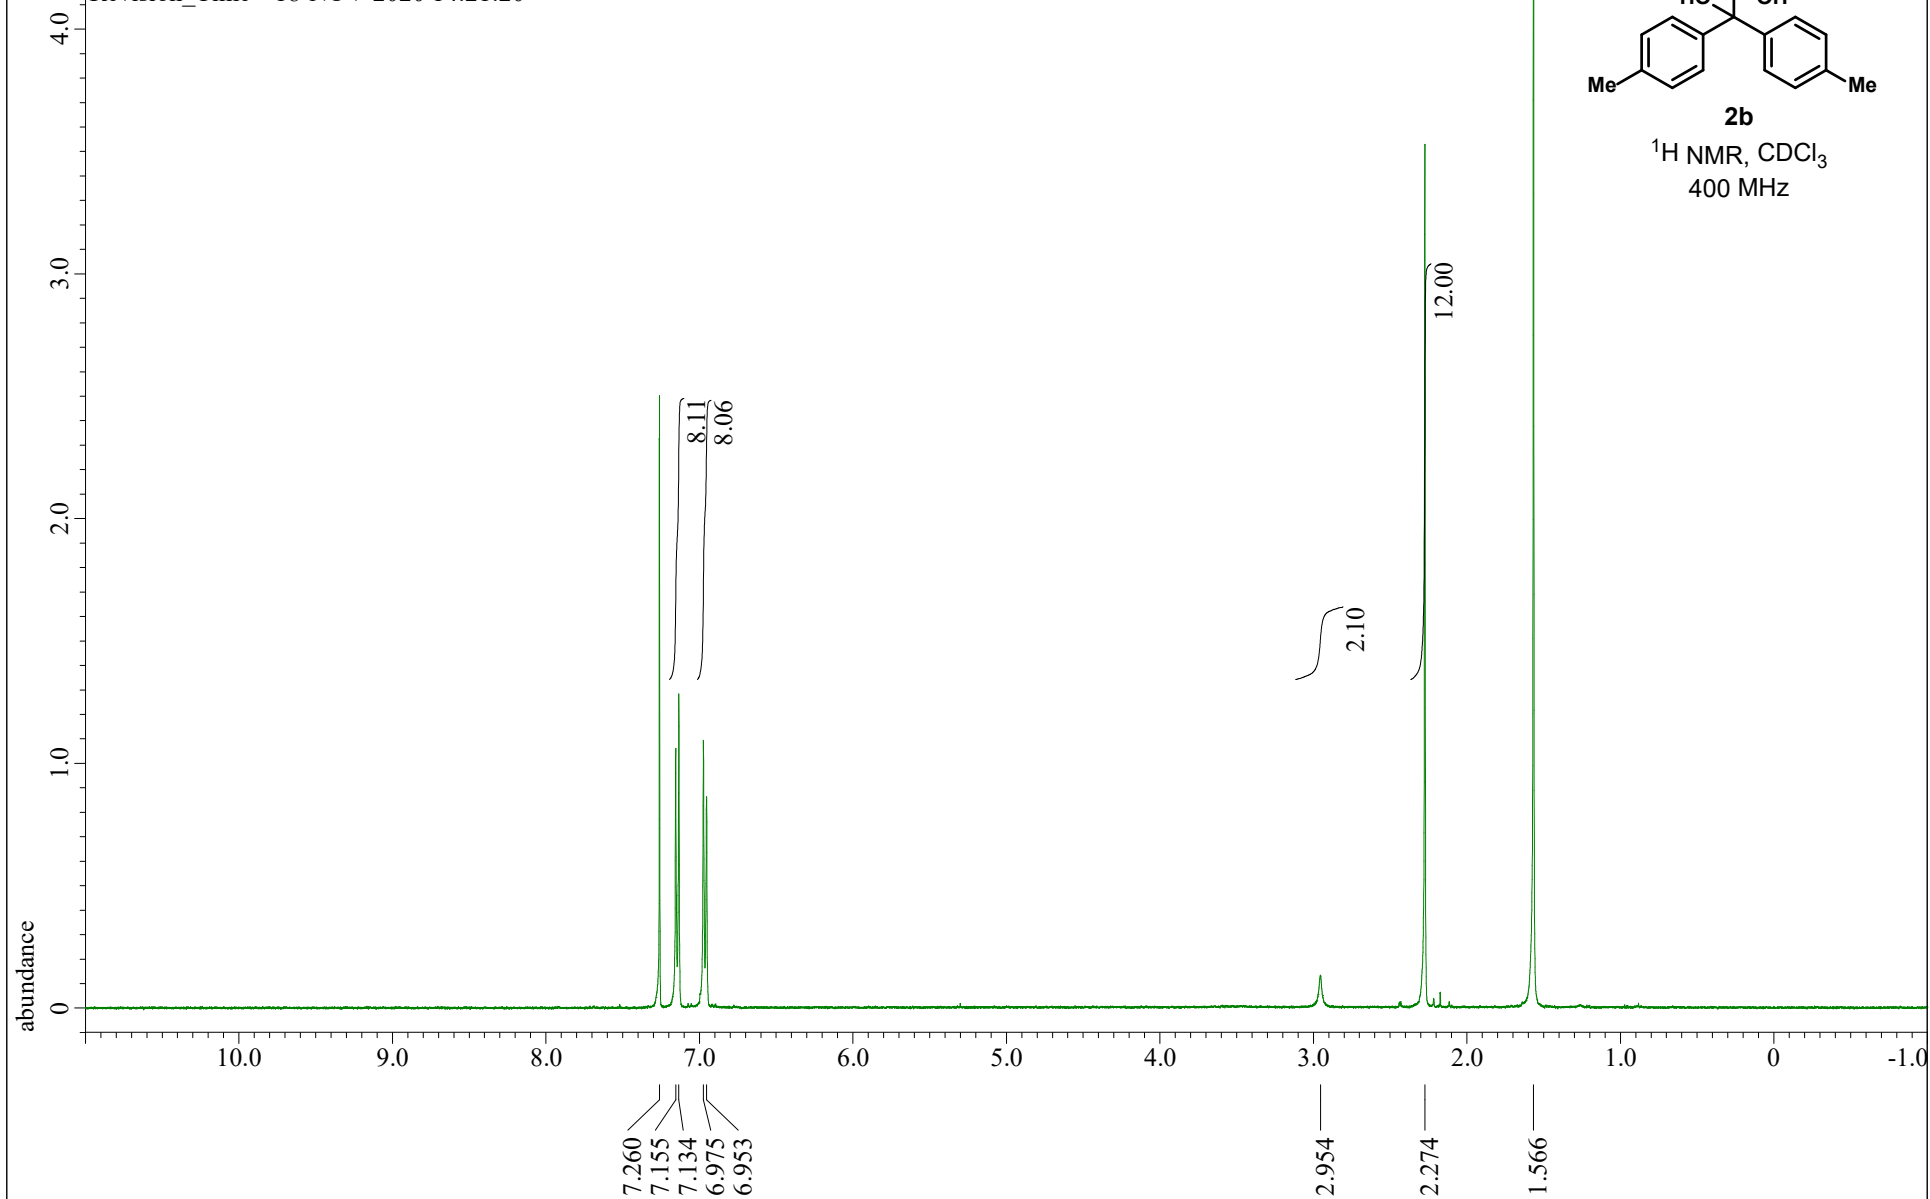

X : parts per Million : Proton

Filename = OSL\_20201118\_JHJ-08-068\_Proton-1-4.jdf  
Author = OSL  
Sample\_Id = 20201118\_JHJ-08-068  
Creation\_Time = 18-NOV-2020 16:00:32  
Revision\_Time = 18-NOV-2020 16:42:46

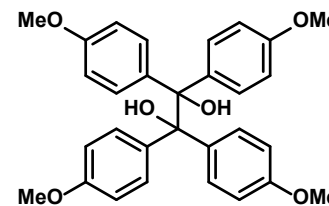

**2c**

<sup>1</sup>H NMR, acetone-d<sub>6</sub>  
400 MHz

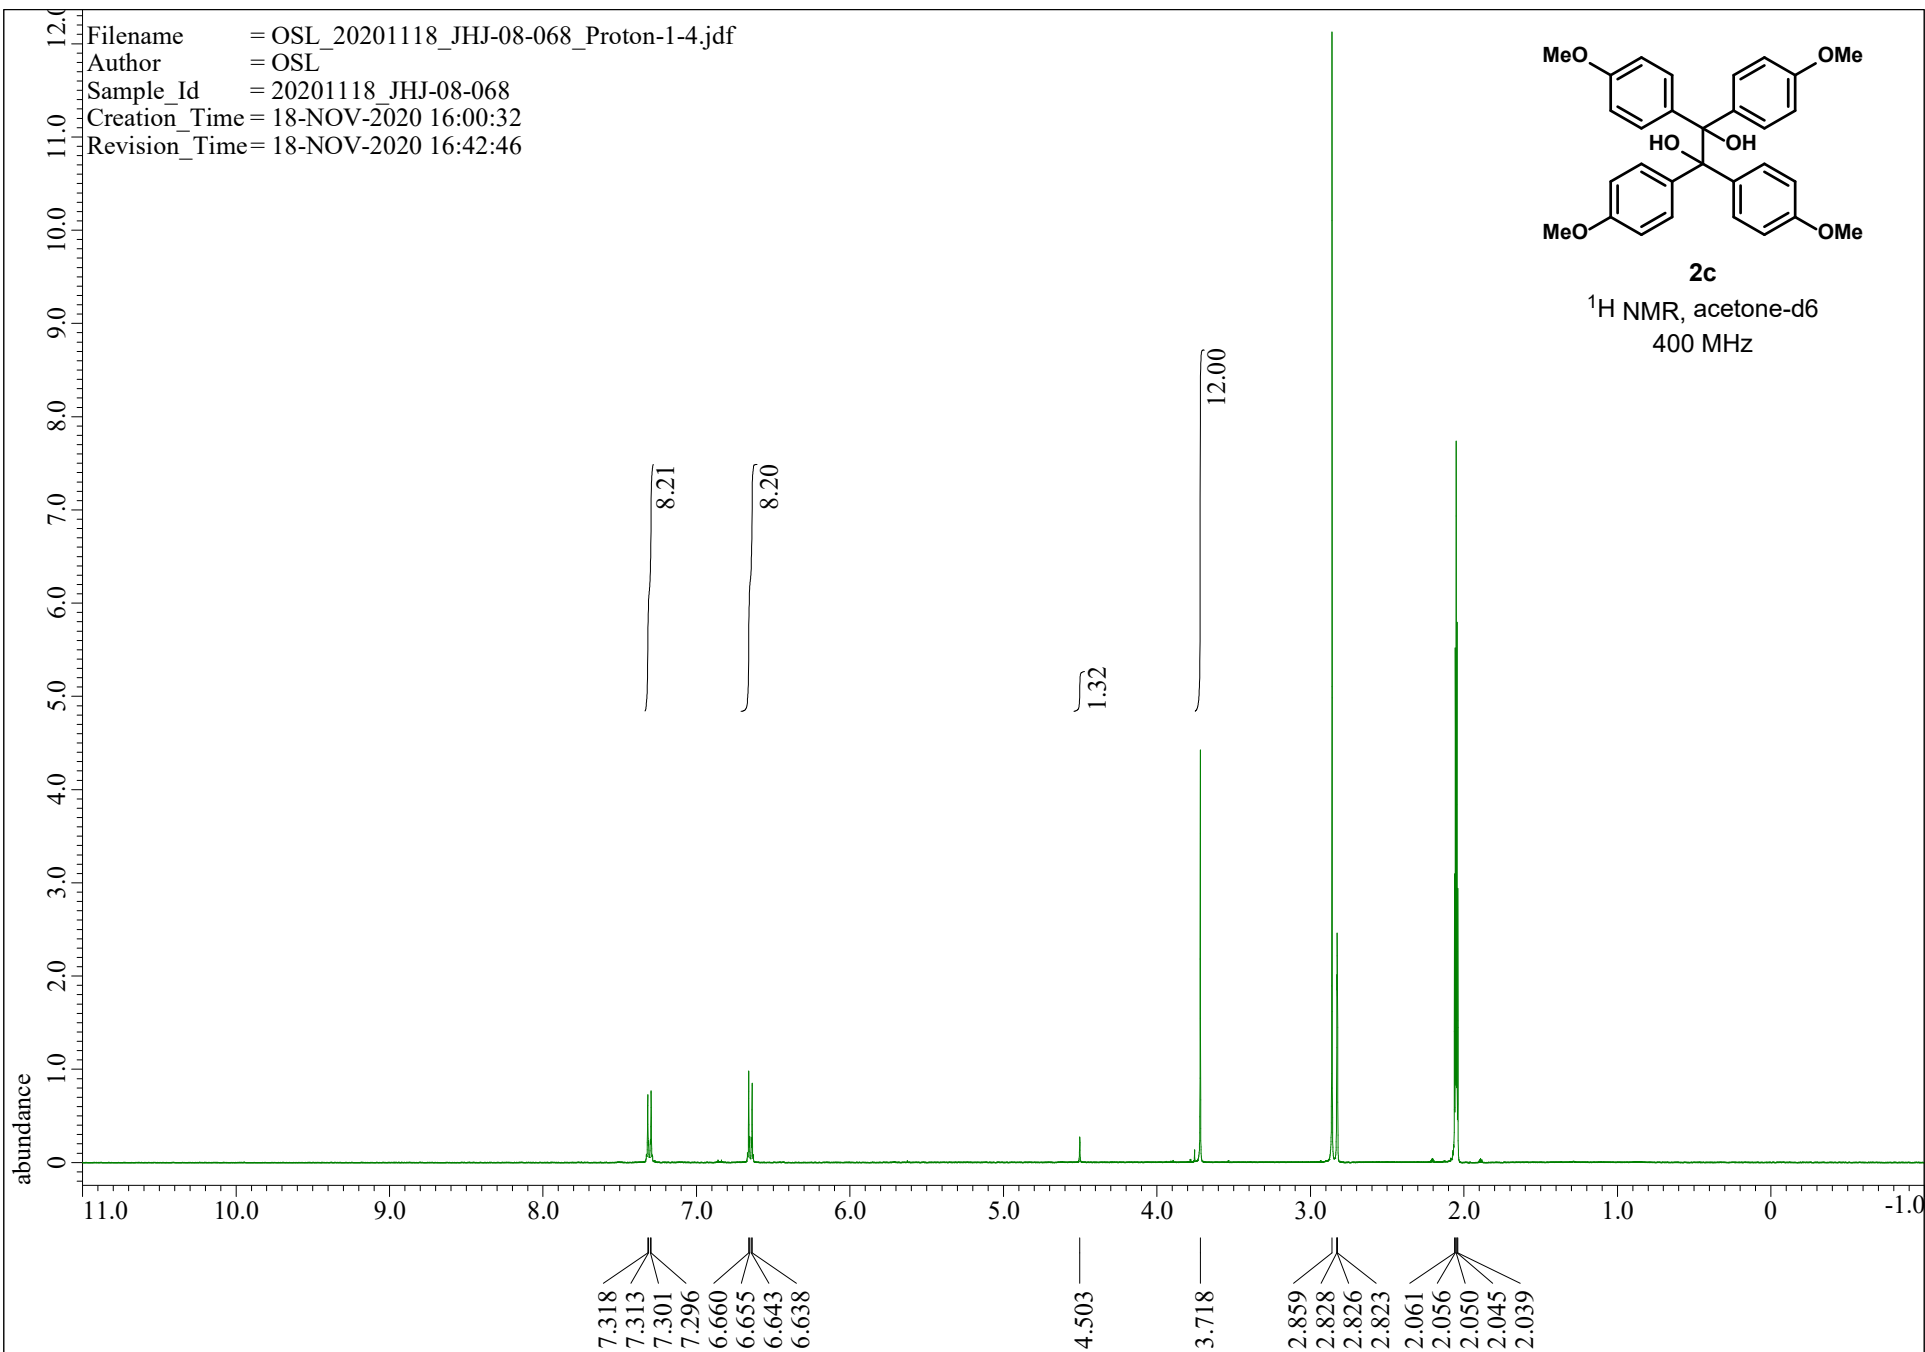

X : parts per Million : Proton

Filename = OSL\_20201014\_JHJ-08-046 column tube 20-35\_Proton-1-4.jdf  
Author = OSL  
Sample\_Id = 20201014\_JHJ-08-046 column tube 20-35  
Creation\_Time = 14-OCT-2020 17:49:28  
Revision\_Time = 18-NOV-2020 14:27:49

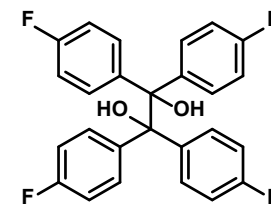

**2d**

<sup>1</sup>H NMR, CDCl<sub>3</sub>  
400 MHz

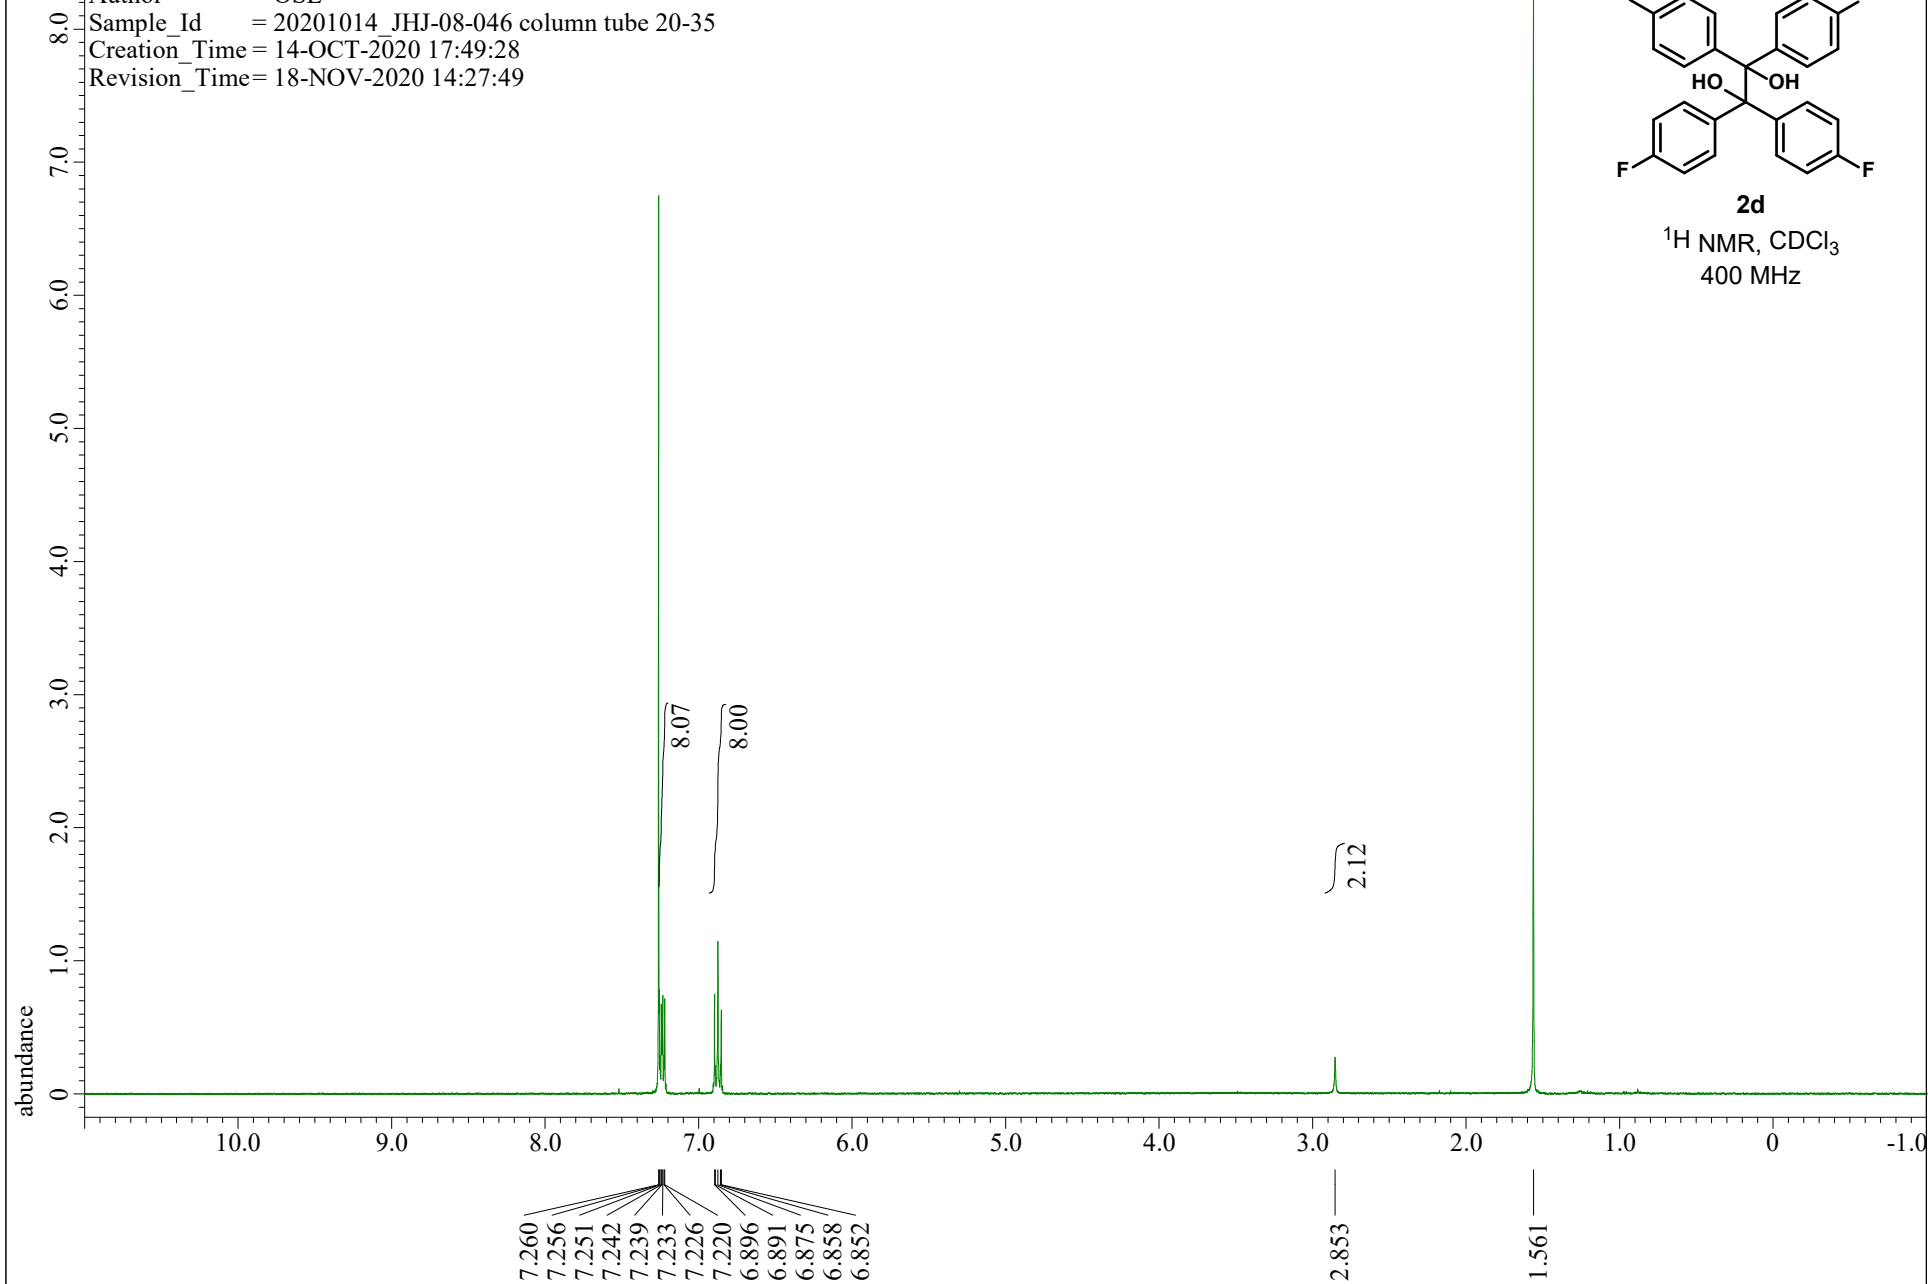

X : parts per Million : Proton

Filename = OSL\_20201013\_JHJ-08-070 column tube 10-19\_Proton-1-4.jdf  
Author = OSL  
Sample\_Id = 20201013\_JHJ-08-070 column tube 10-19  
Creation\_Time = 13-OCT-2020 22:04:44  
Revision\_Time = 18-NOV-2020 14:43:20

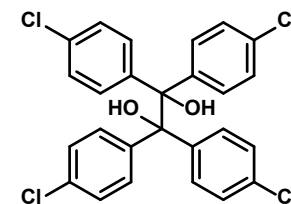

**2e**

<sup>1</sup>H NMR, CDCl<sub>3</sub>  
400 MHz

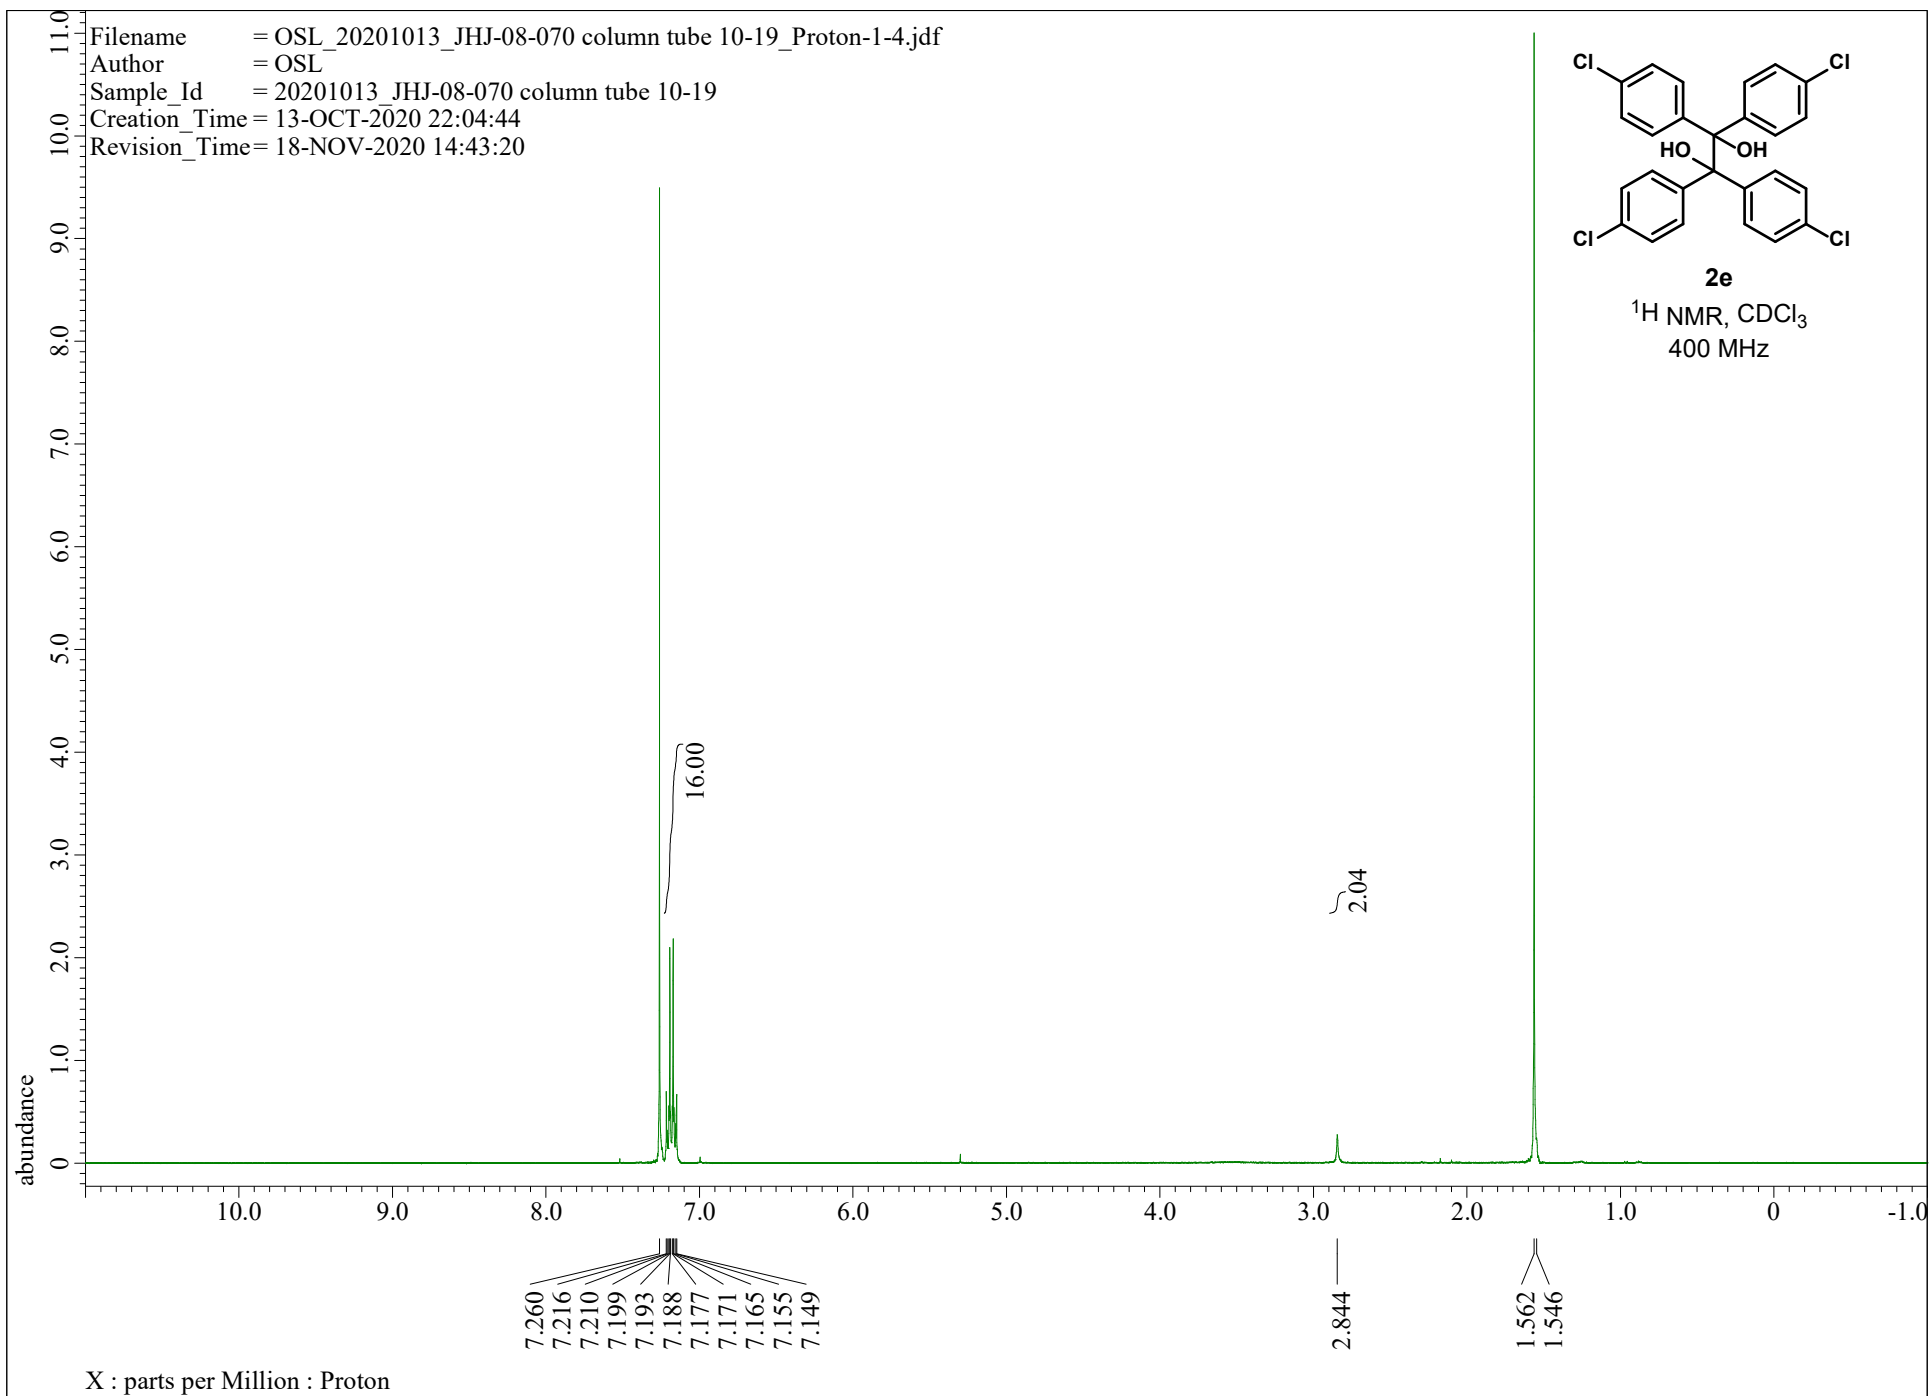

Filename = JHJ-08-081 proton\_Proton-1-4.jdf  
Author = delta  
Sample\_Id = JHJ-08-081 proton  
Creation\_Time = 25-NOV-2020 12:58:50  
Revision\_Time = 25-NOV-2020 17:13:47  
Inst\_Model\_Number =  
Inst\_Serial\_Number =  
Version = 5.0.6 [Windows]

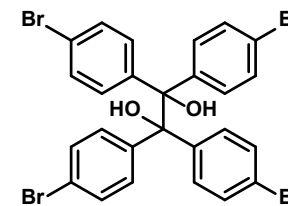

$^1\text{H NMR}$ ,  $\text{CDCl}_3$   
400 MHz

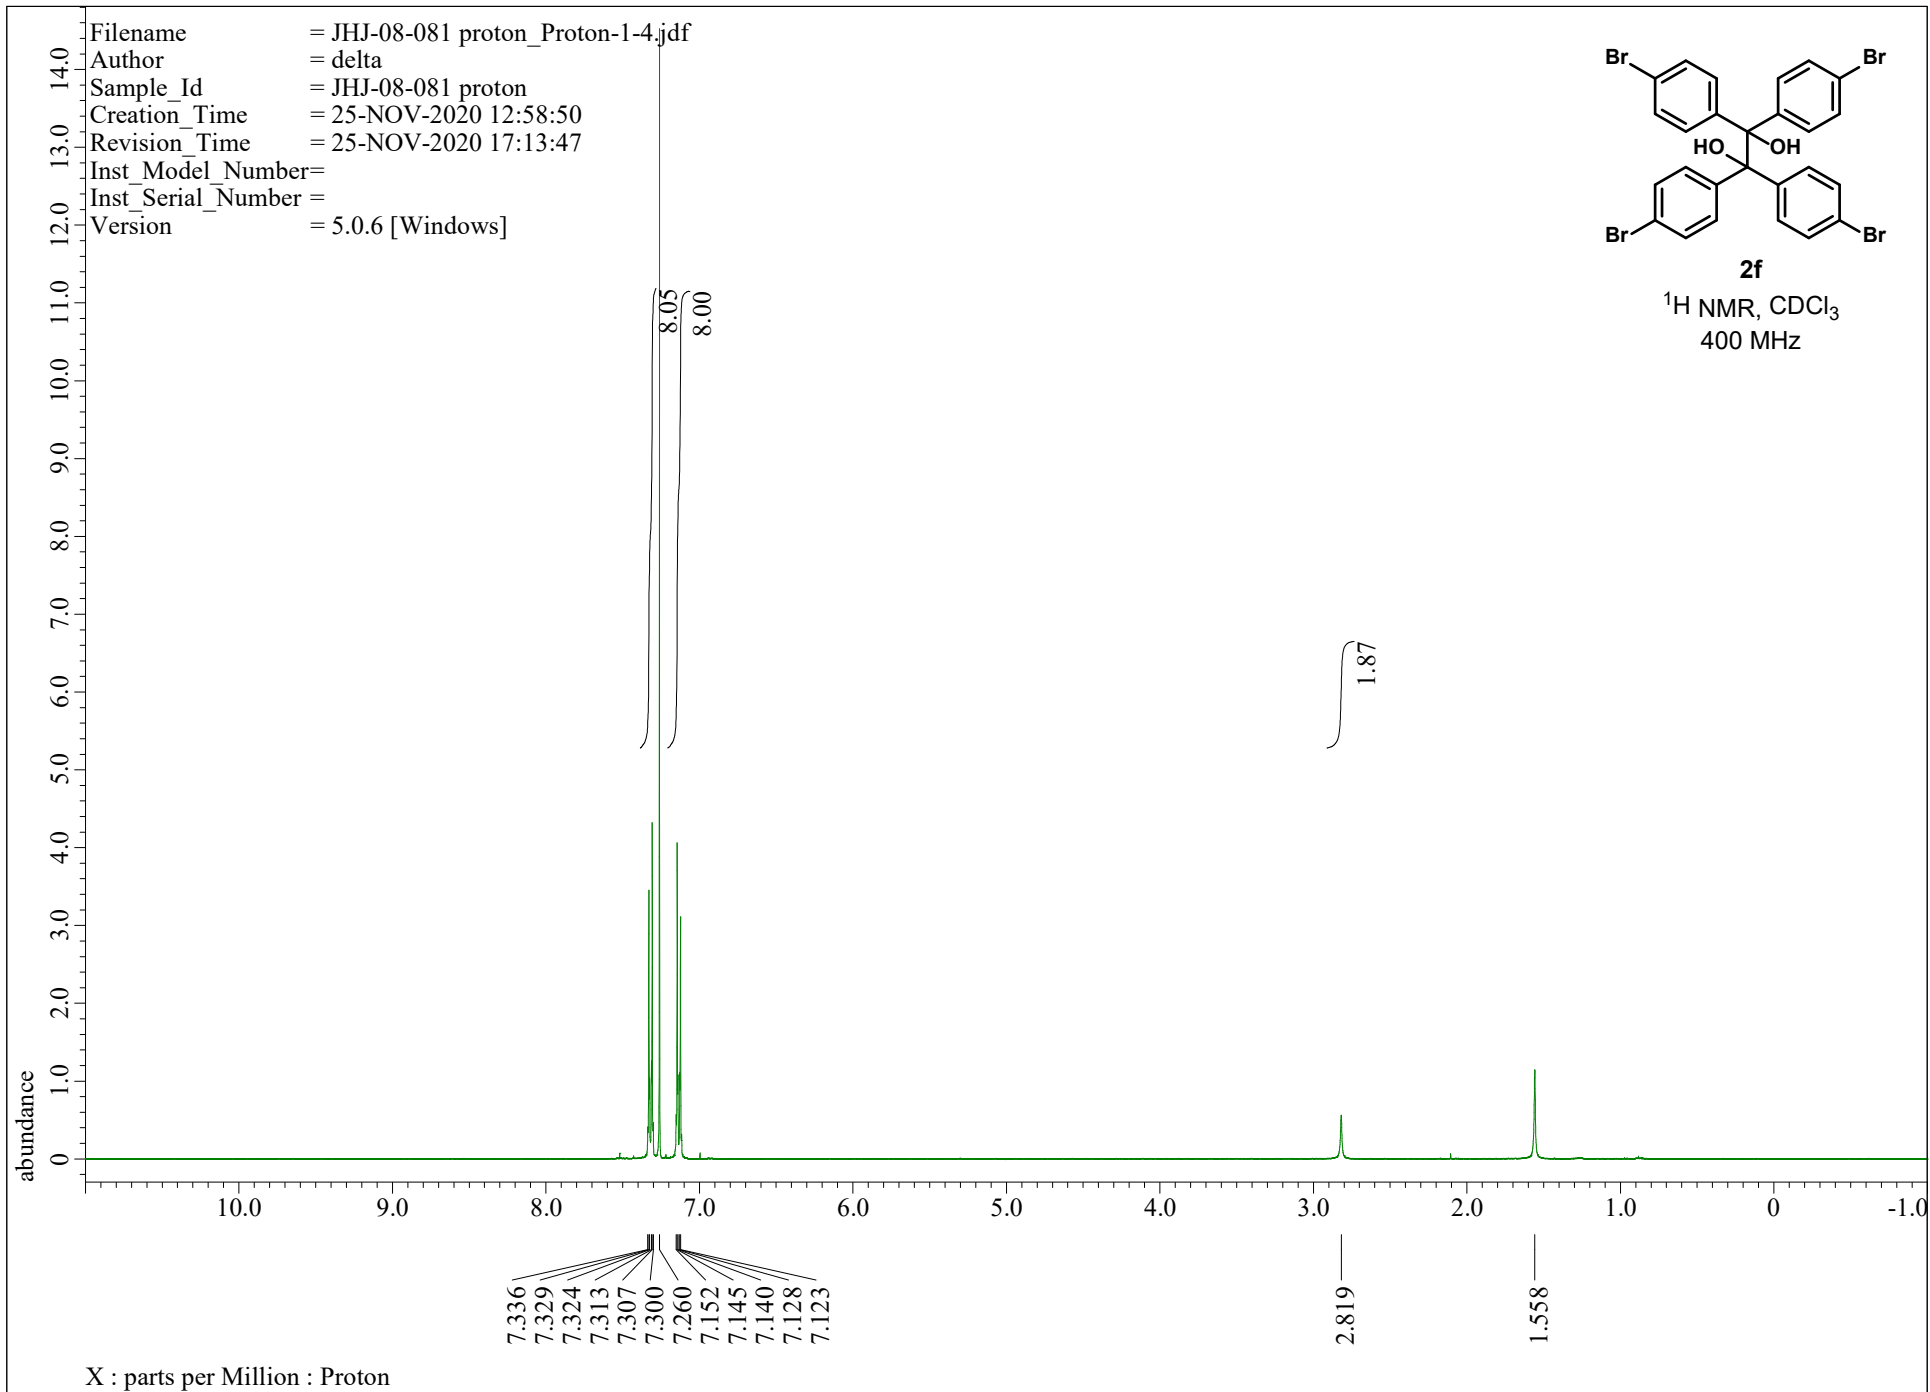

Filename = JHJ-08-081 carbon\_Carbon-1-2.jdf  
Author = delta  
Sample\_Id = JHJ-08-081 carbon  
Creation\_Time = 25-NOV-2020 12:00:51  
Revision\_Time = 25-NOV-2020 17:11:08  
Inst\_Model\_Number =  
Inst\_Serial\_Number =  
Version = 5.0.6 [Windows]



**2f**

$^{13}\text{C}$  NMR,  $\text{CDCl}_3$   
100 MHz

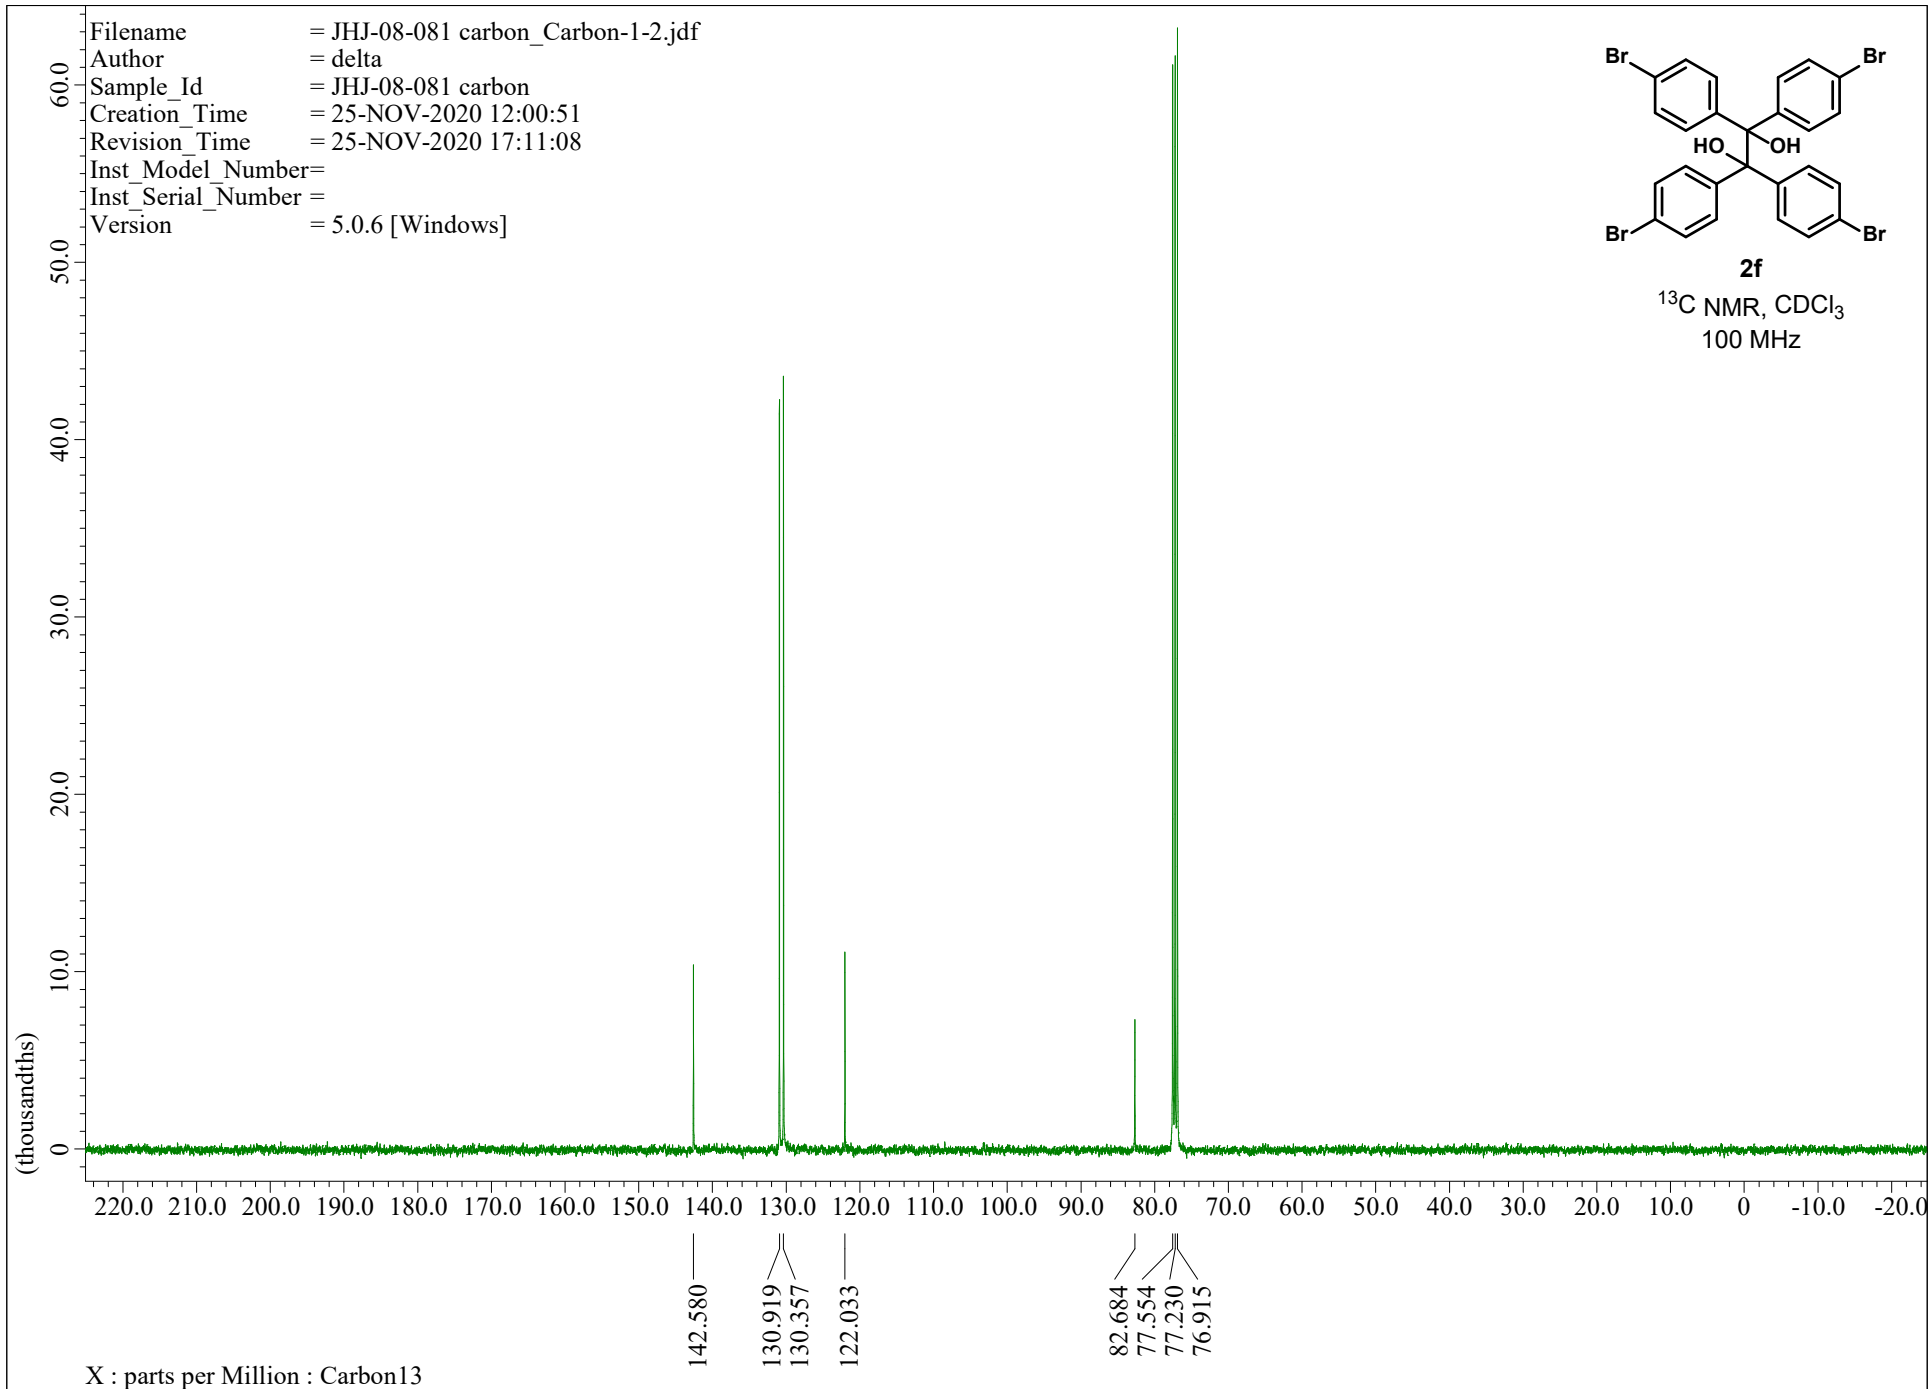

Filename = OSL\_20201019\_JHJ-08-072 column tube 16-57\_Proton-1-5.jdf  
Author = OSL  
Sample\_Id = 20201019\_JHJ-08-072 column tube 16-57  
Creation\_Time = 19-OCT-2020 19:30:45  
Revision\_Time = 18-NOV-2020 14:50:22

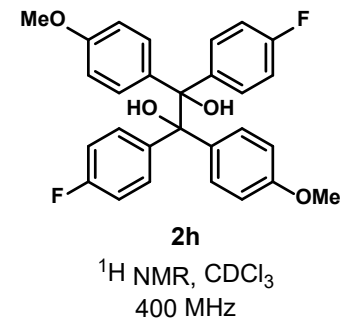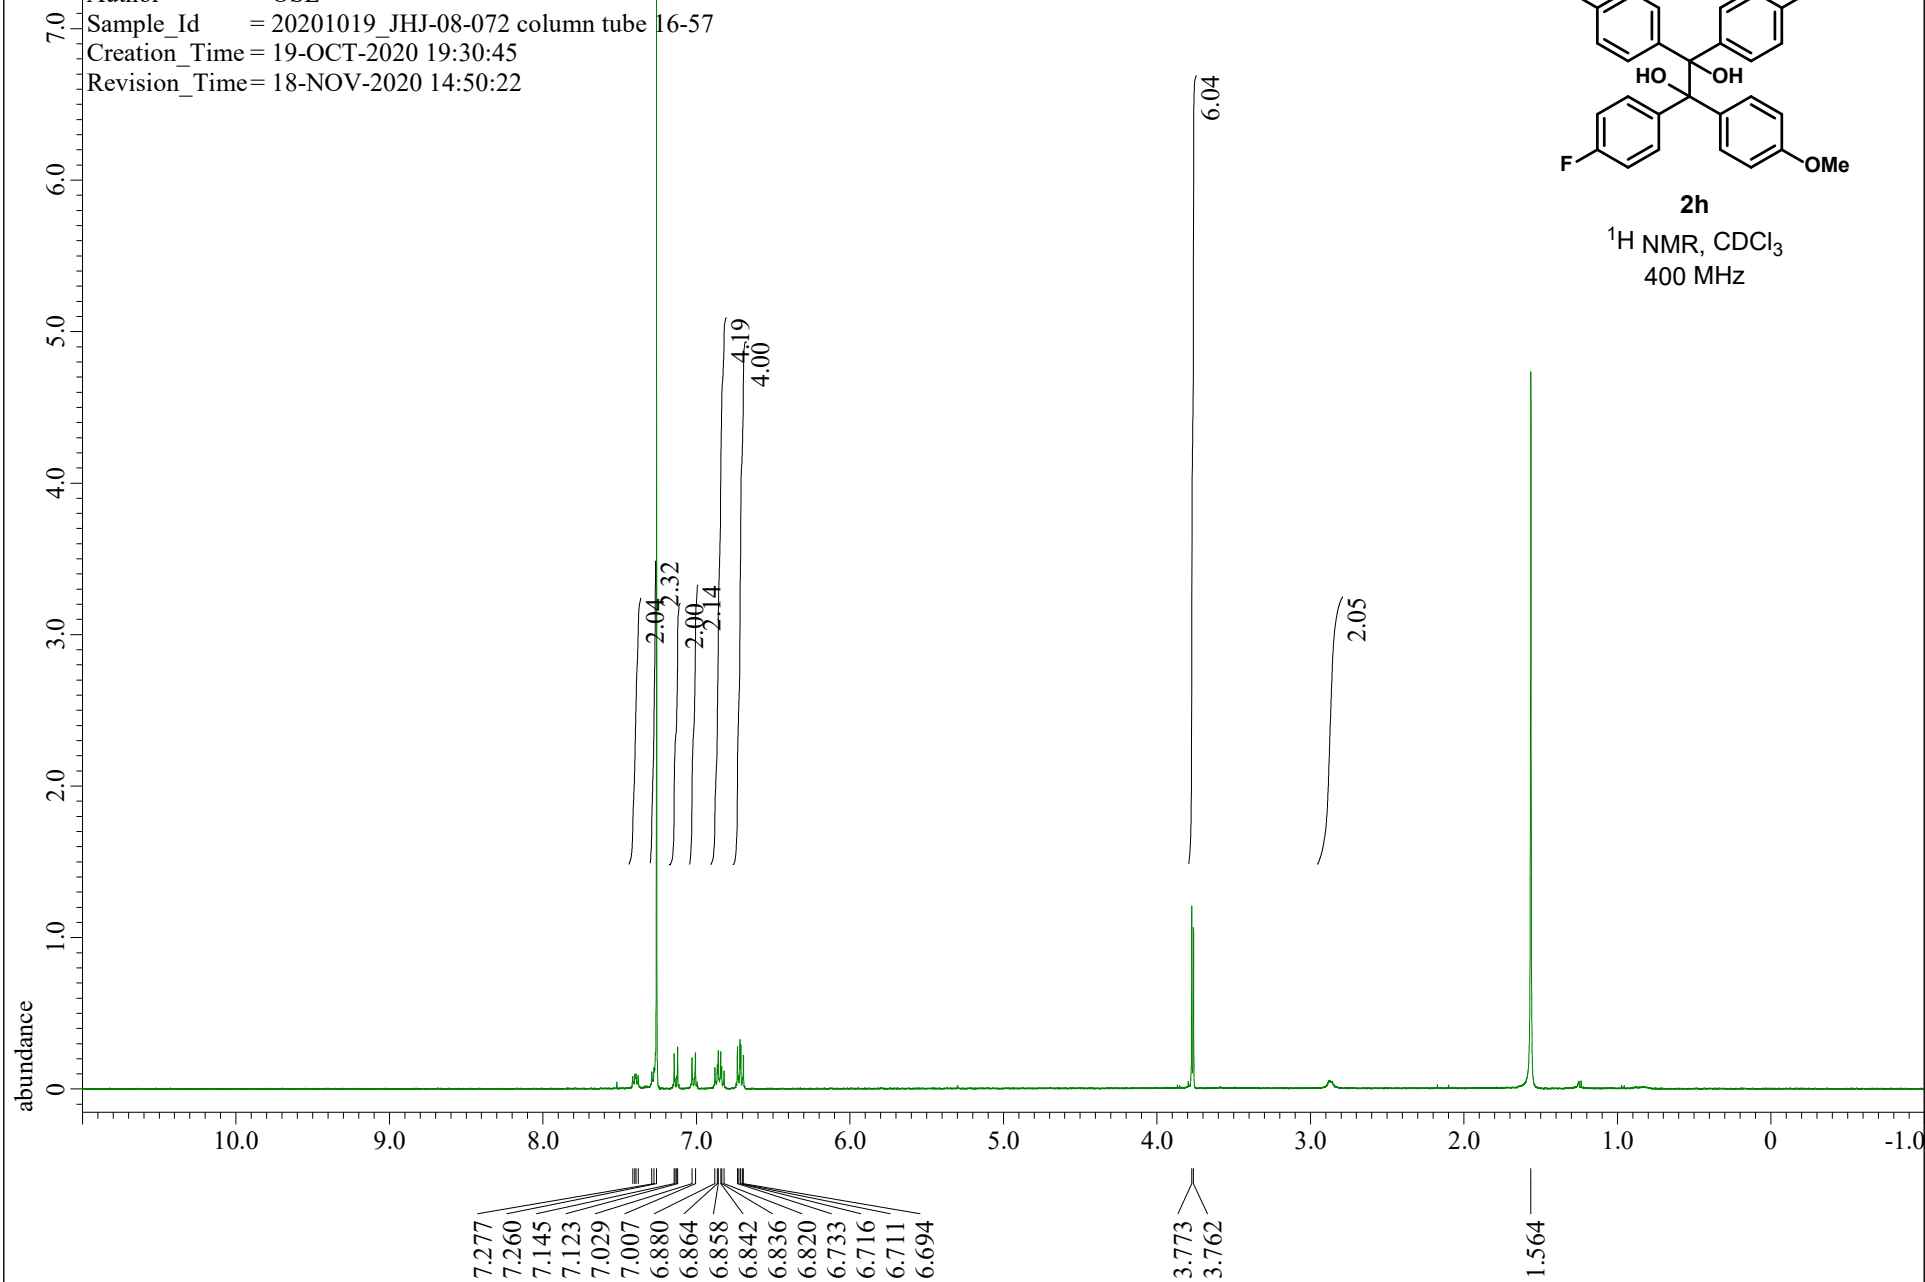

X : parts per Million : Proton

Filename = OSL\_20201216\_JHJ-08-096\_Proton-3-5.jdf  
Author = OSL  
Sample\_Id = 20201216\_JHJ-08-096  
Creation\_Time = 16-DEC-2020 13:37:54  
Revision\_Time = 16-DEC-2020 13:42:57

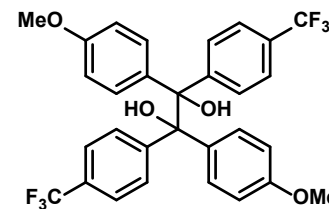

**2i**

<sup>1</sup>H NMR, CDCl<sub>3</sub>  
400 MHz  
(mixture of diastereomers)

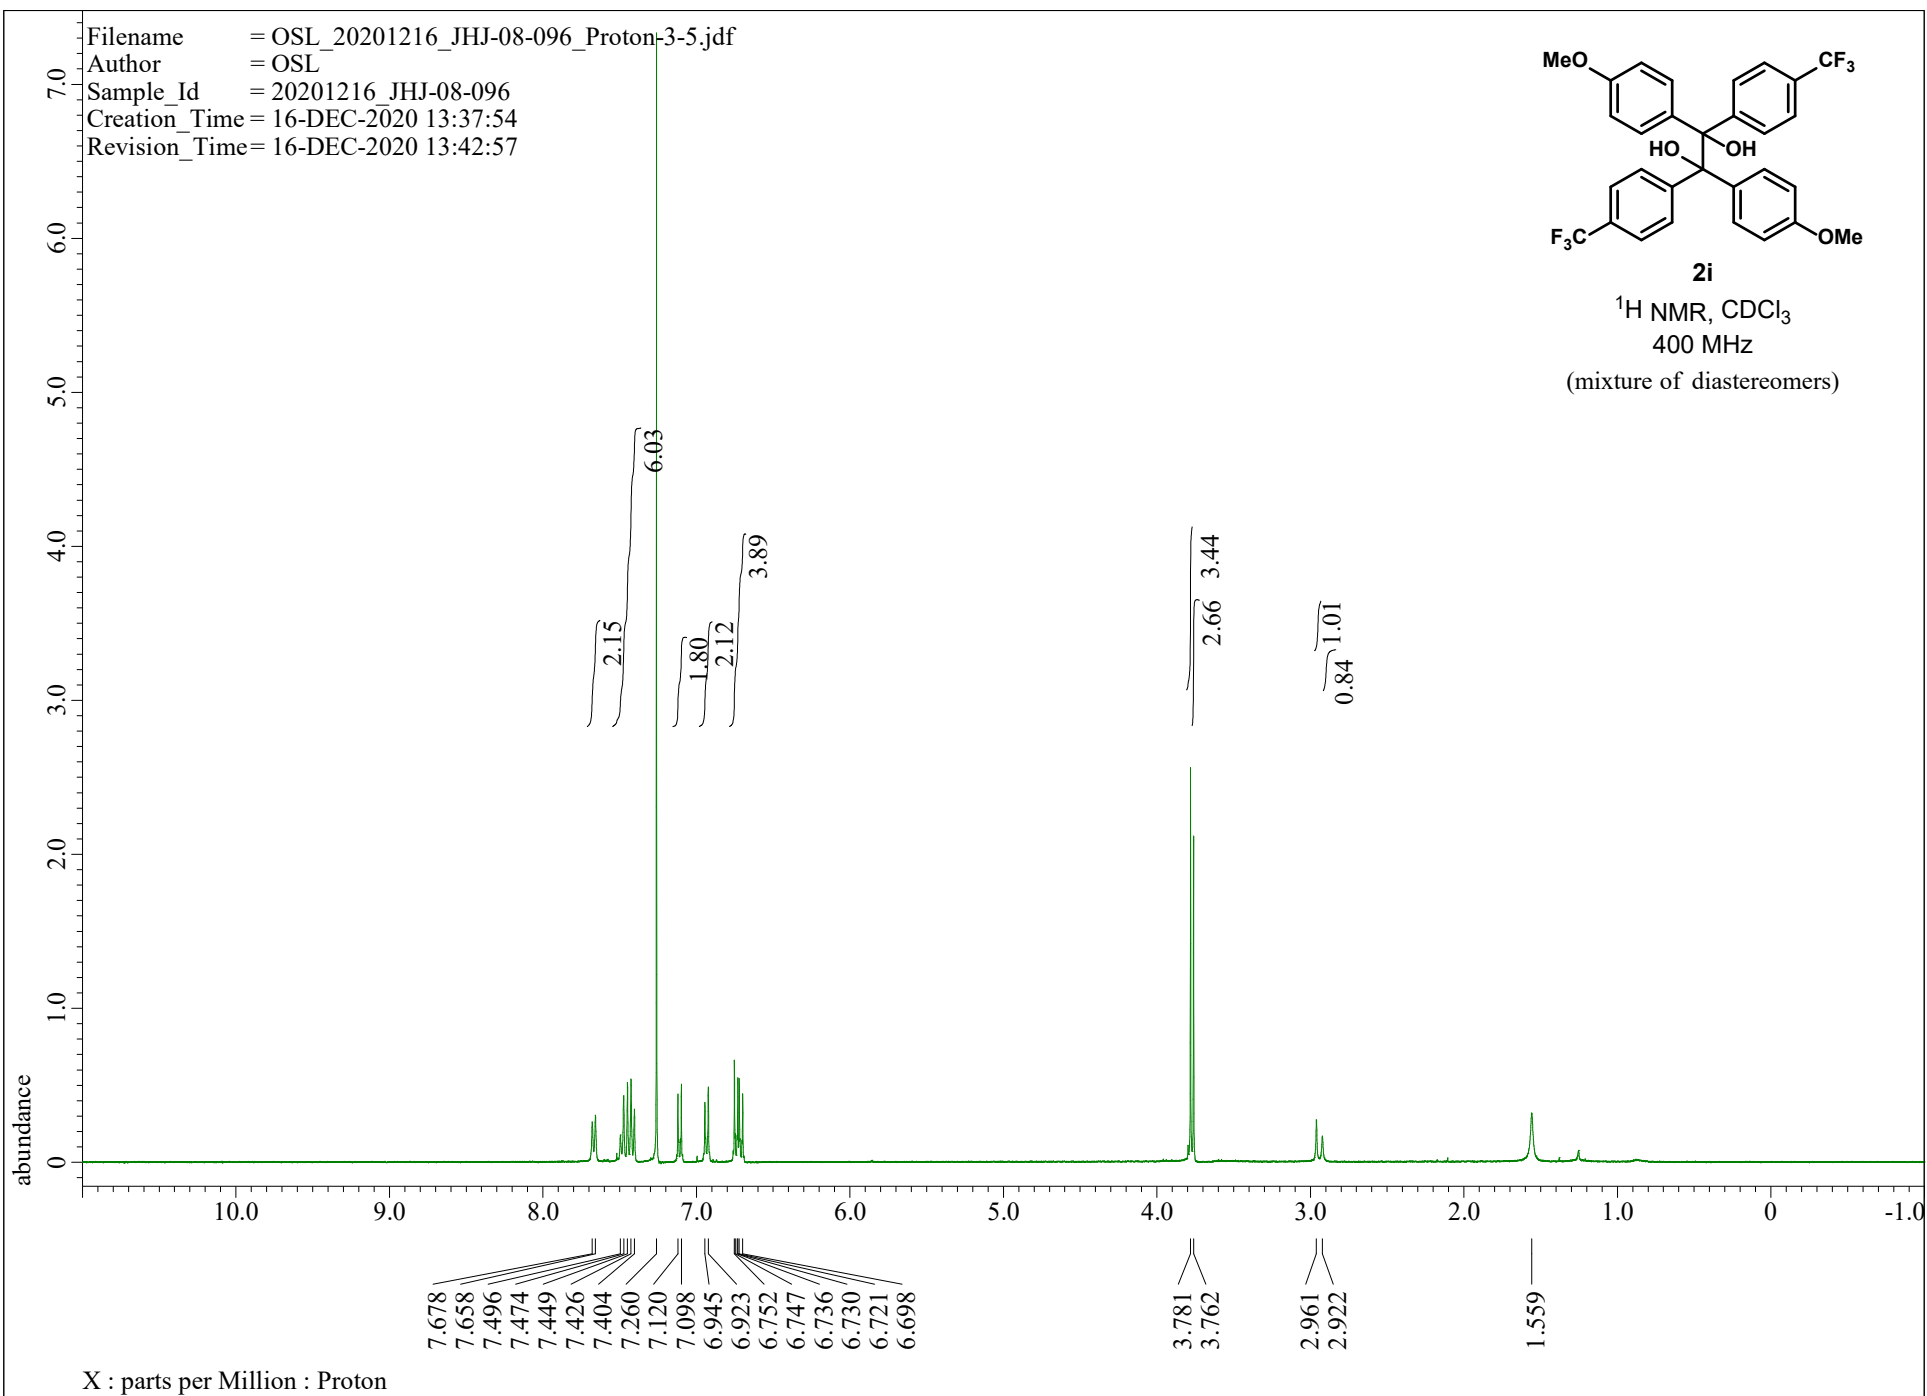



Filename = OSL\_20201217\_JHJ-08-096 front\_Proton-1-3.jdf  
Author = OSL  
Sample\_Id = 20201217\_JHJ-08-096 front  
Creation\_Time = 17-DEC-2020 14:24:26  
Revision\_Time = 17-DEC-2020 14:30:21



2i

<sup>1</sup>H NMR, CDCl<sub>3</sub>  
400 MHz

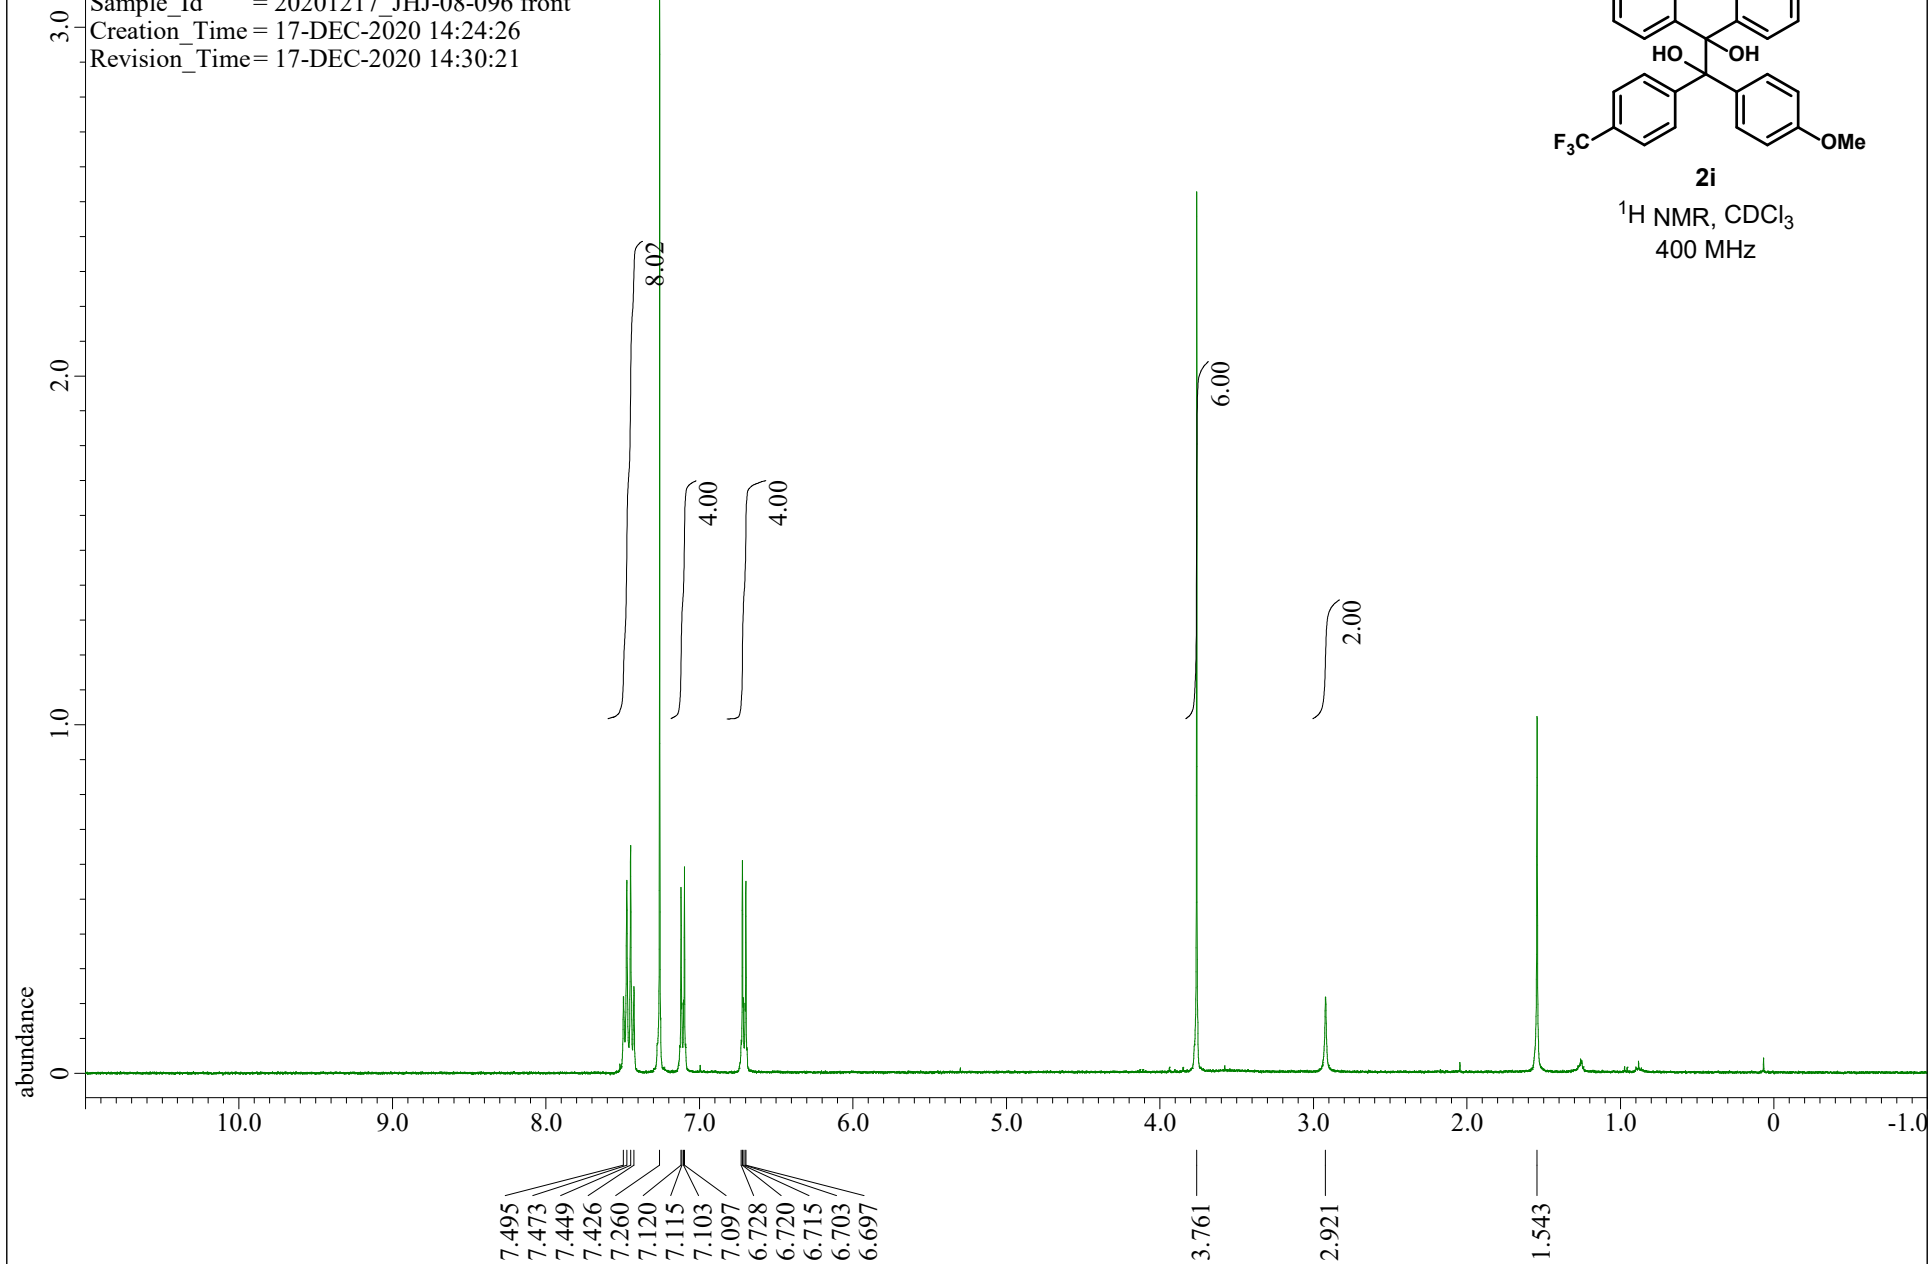

X : parts per Million : Proton

Filename = OSL\_20201217\_JHJ-08-096 back\_Proton-1-6.jdf  
Author = OSL  
Sample\_Id = 20201217\_JHJ-08-096 back  
Creation\_Time = 17-DEC-2020 14:28:33  
Revision\_Time = 17-DEC-2020 20:00:40

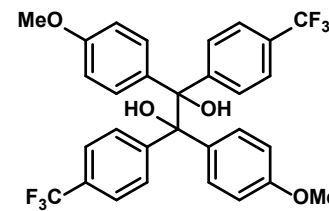

**2i**

<sup>1</sup>H NMR, CDCl<sub>3</sub>  
400 MHz

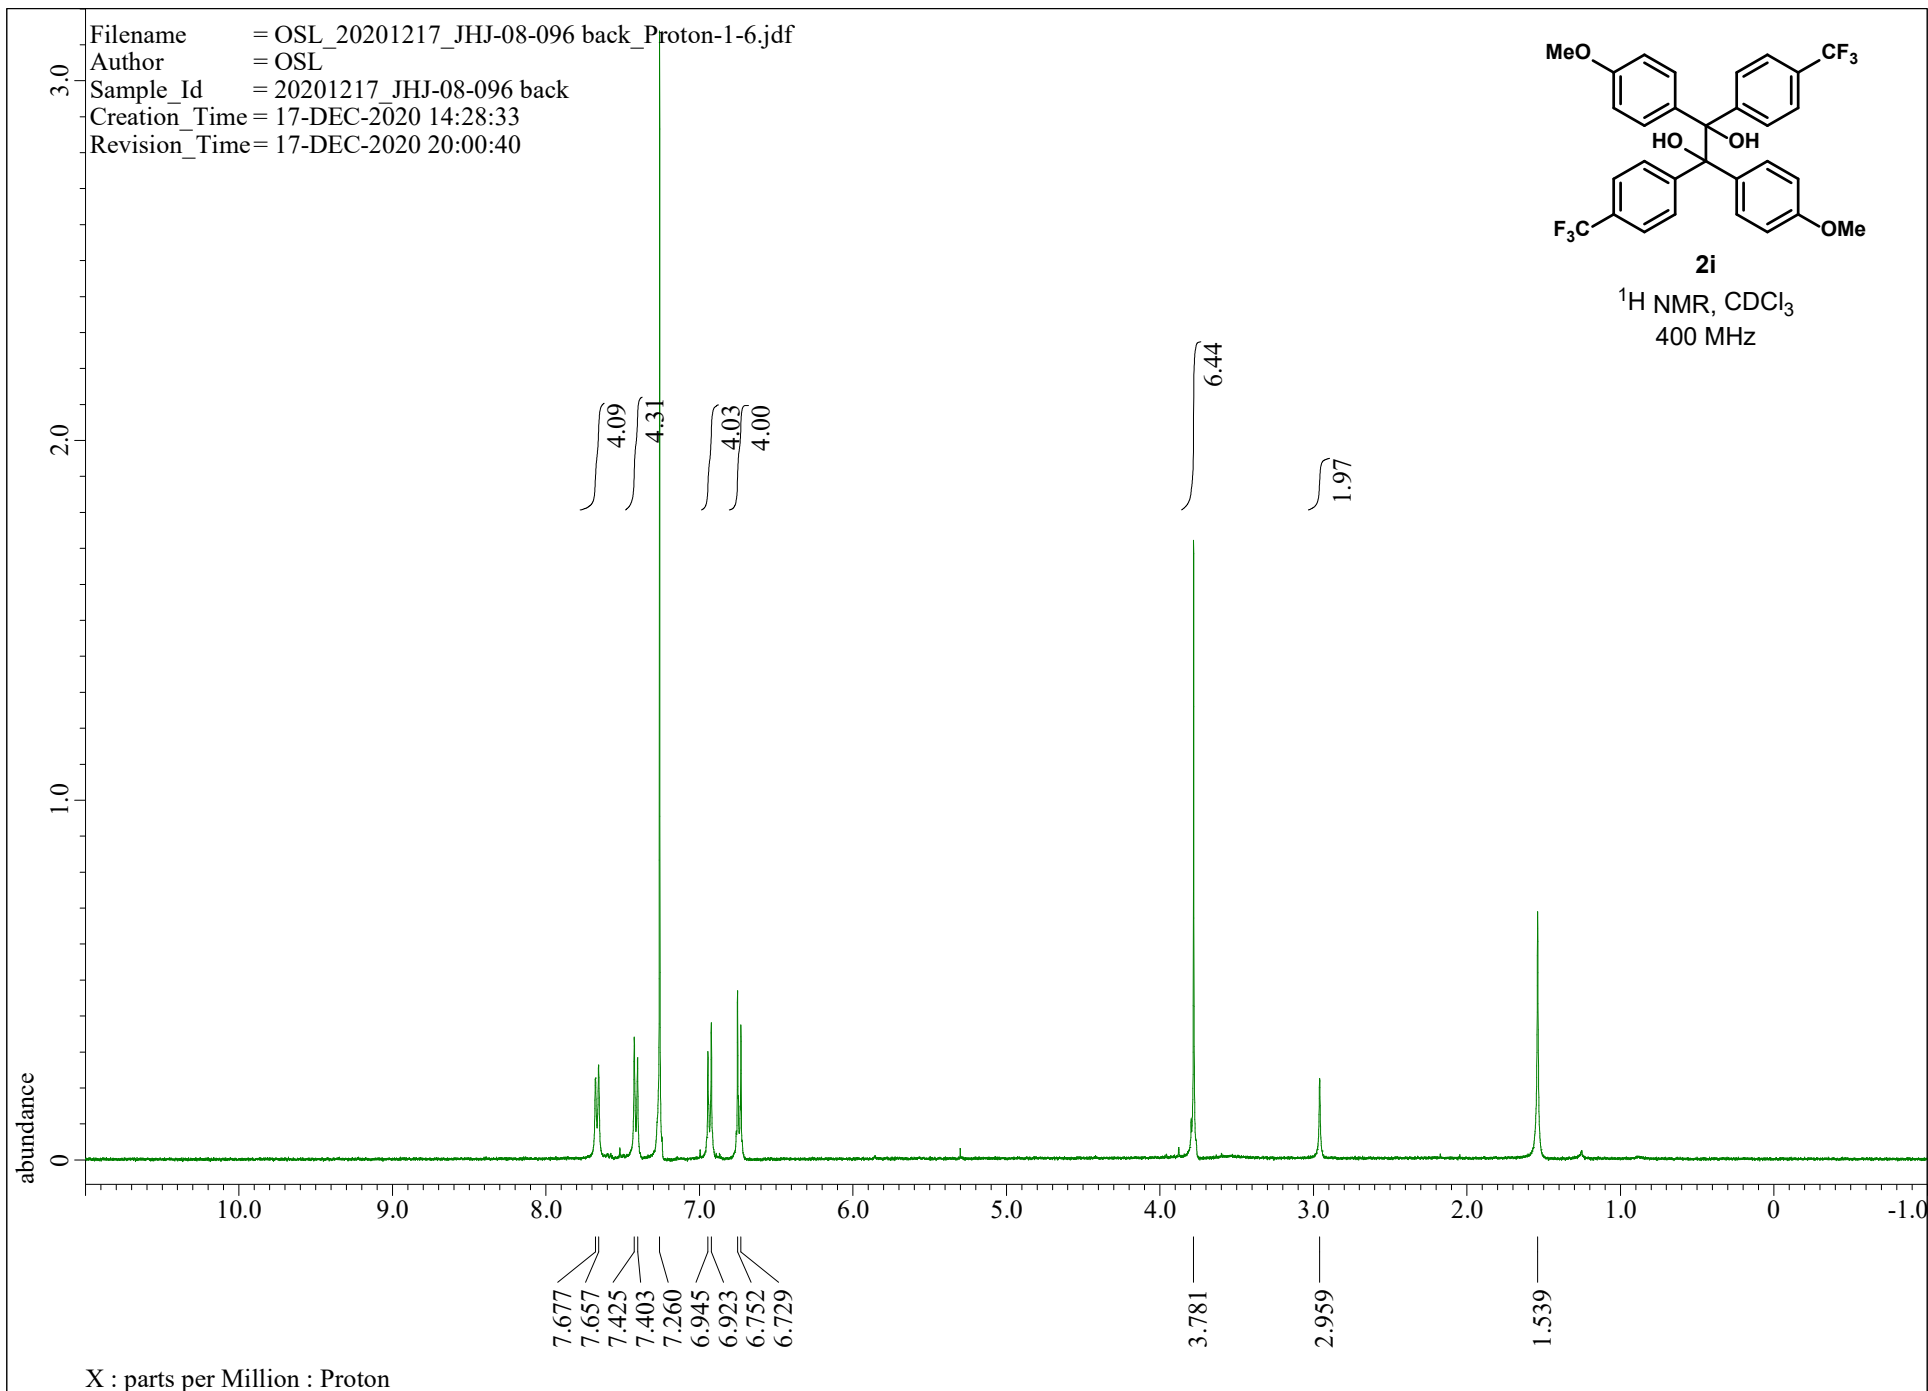

Filename = OSL\_20201217\_JHJ-08-096 front (carbon)\_Carbon\_copy2-3-4.jdf  
Author = OSL  
Sample\_Id = 20201217\_JHJ-08-096 front (carbon)  
Creation\_Time = 17-DEC-2020 17:48:29  
Revision\_Time = 17-DEC-2020 19:40:35

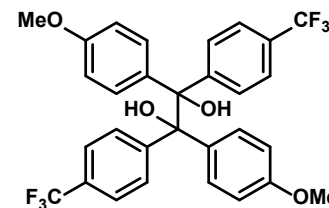

2i

<sup>13</sup>C NMR, CDCl<sub>3</sub>  
100 MHz

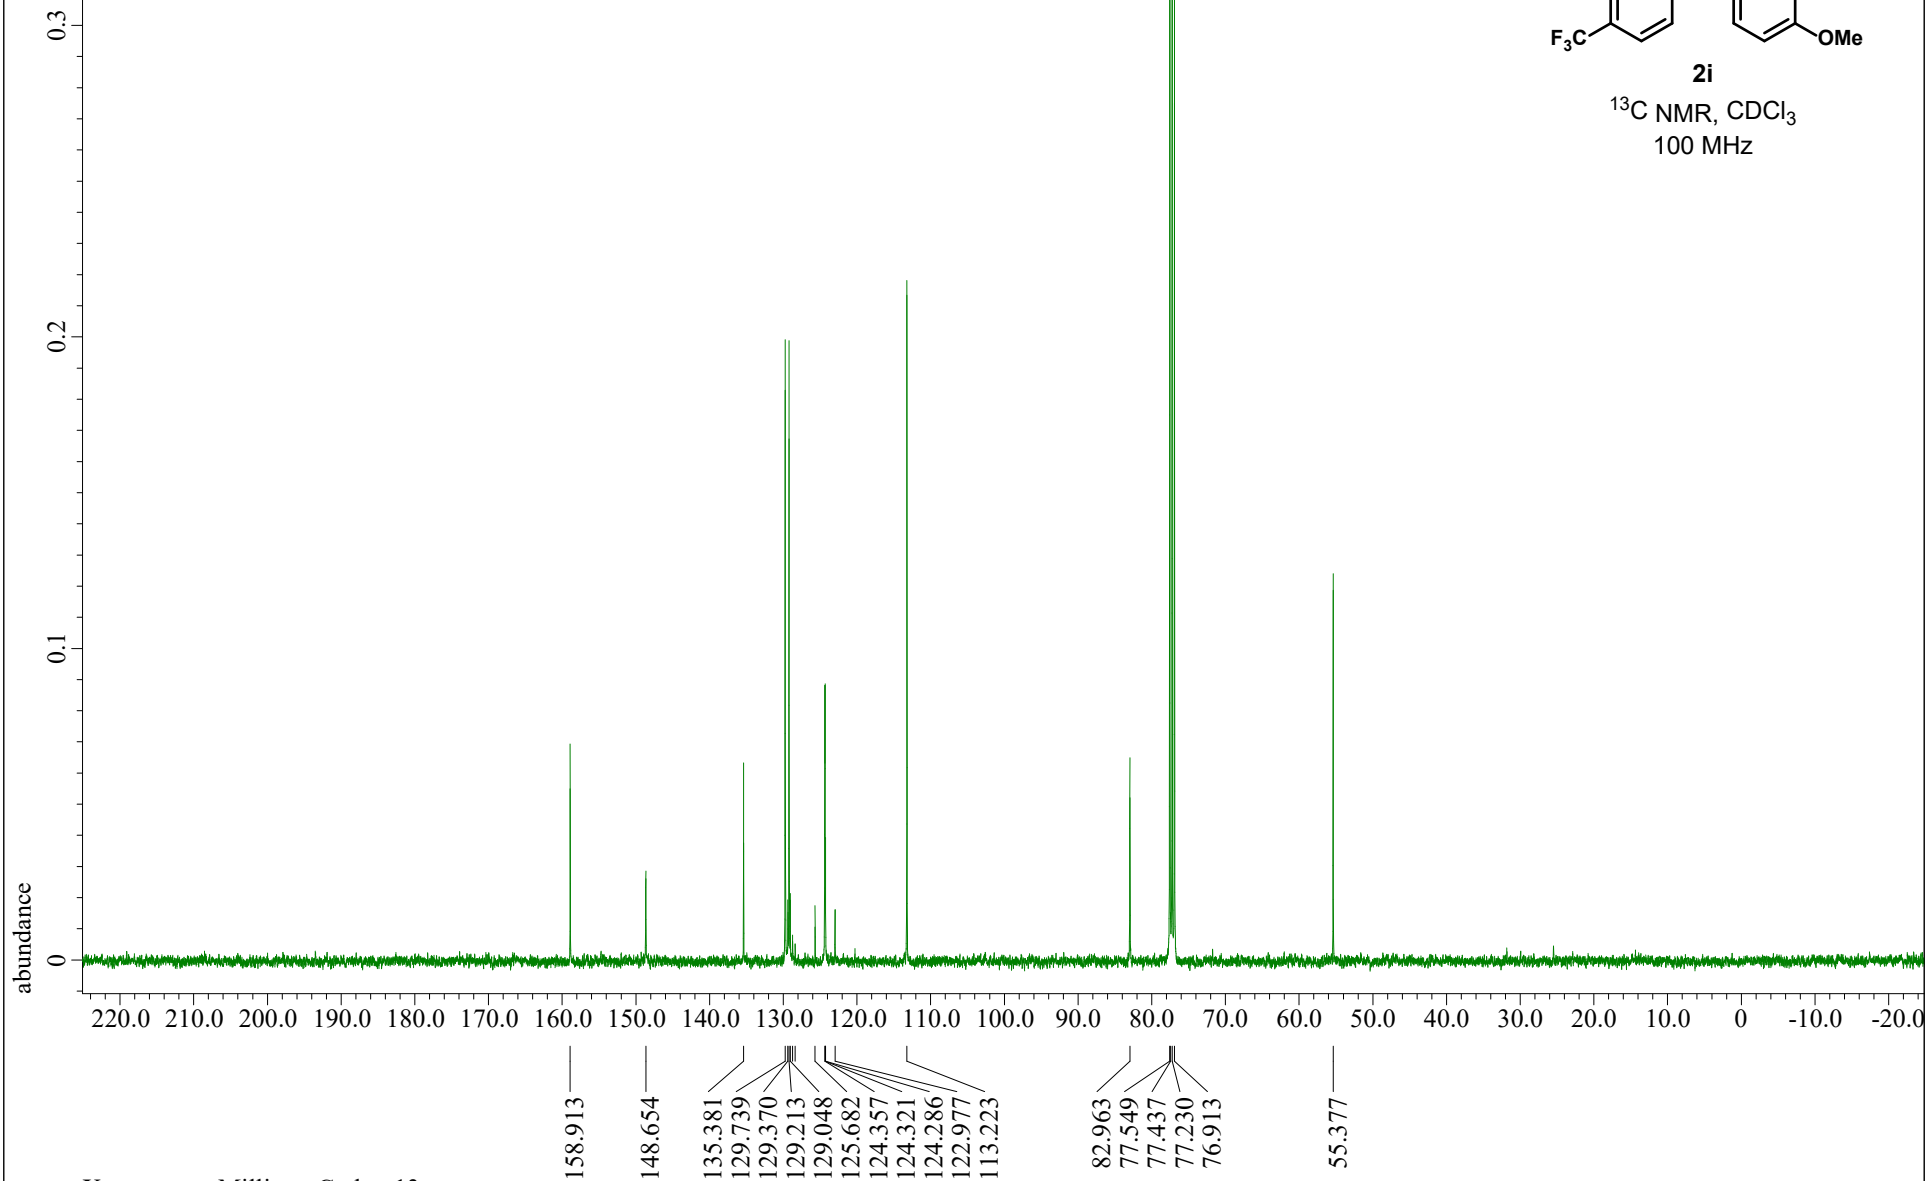

X : parts per Million : Carbon13

Filename = OSL\_20201217\_JHJ-08-096 back (carbon)\_Carbon-1-2.jdf  
Author = OSL  
Sample\_Id = 20201217\_JHJ-08-096 back (carbon)  
Creation\_Time = 17-DEC-2020 18:19:51  
Revision\_Time = 17-DEC-2020 20:07:57

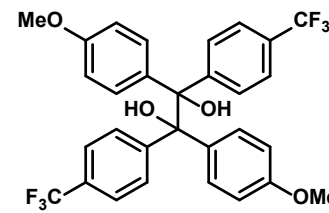

2i

<sup>13</sup>C NMR, CDCl<sub>3</sub>  
100 MHz

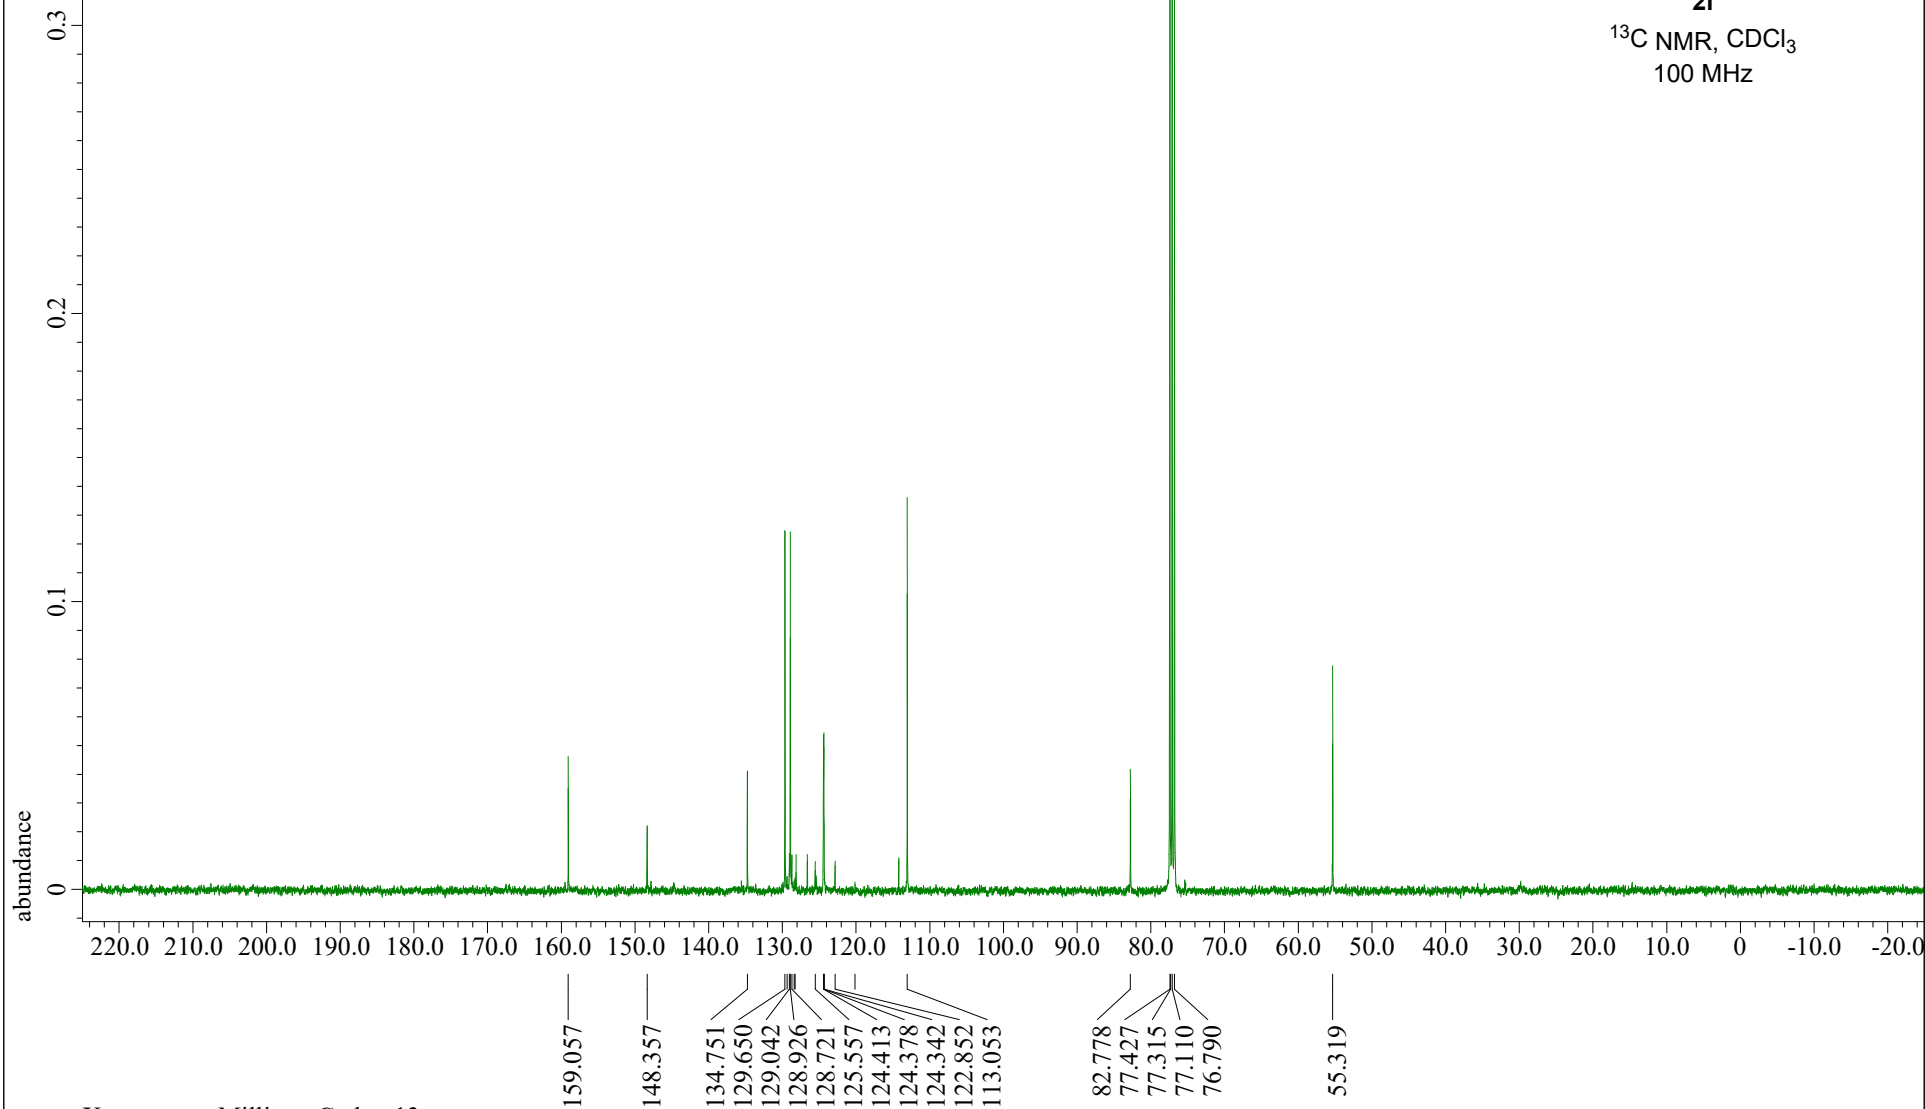

Filename = OSL\_20201118\_JHJ-08-067\_Proton-1-4.jdf  
Author = OSL  
Sample\_Id = 20201118\_JHJ-08-067  
Creation\_Time = 18-NOV-2020 16:18:04  
Revision\_Time = 18-NOV-2020 16:32:05

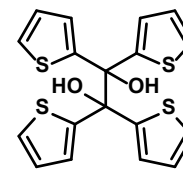

**2j**  
<sup>1</sup>H NMR, CD<sub>3</sub>CN  
400 MHz

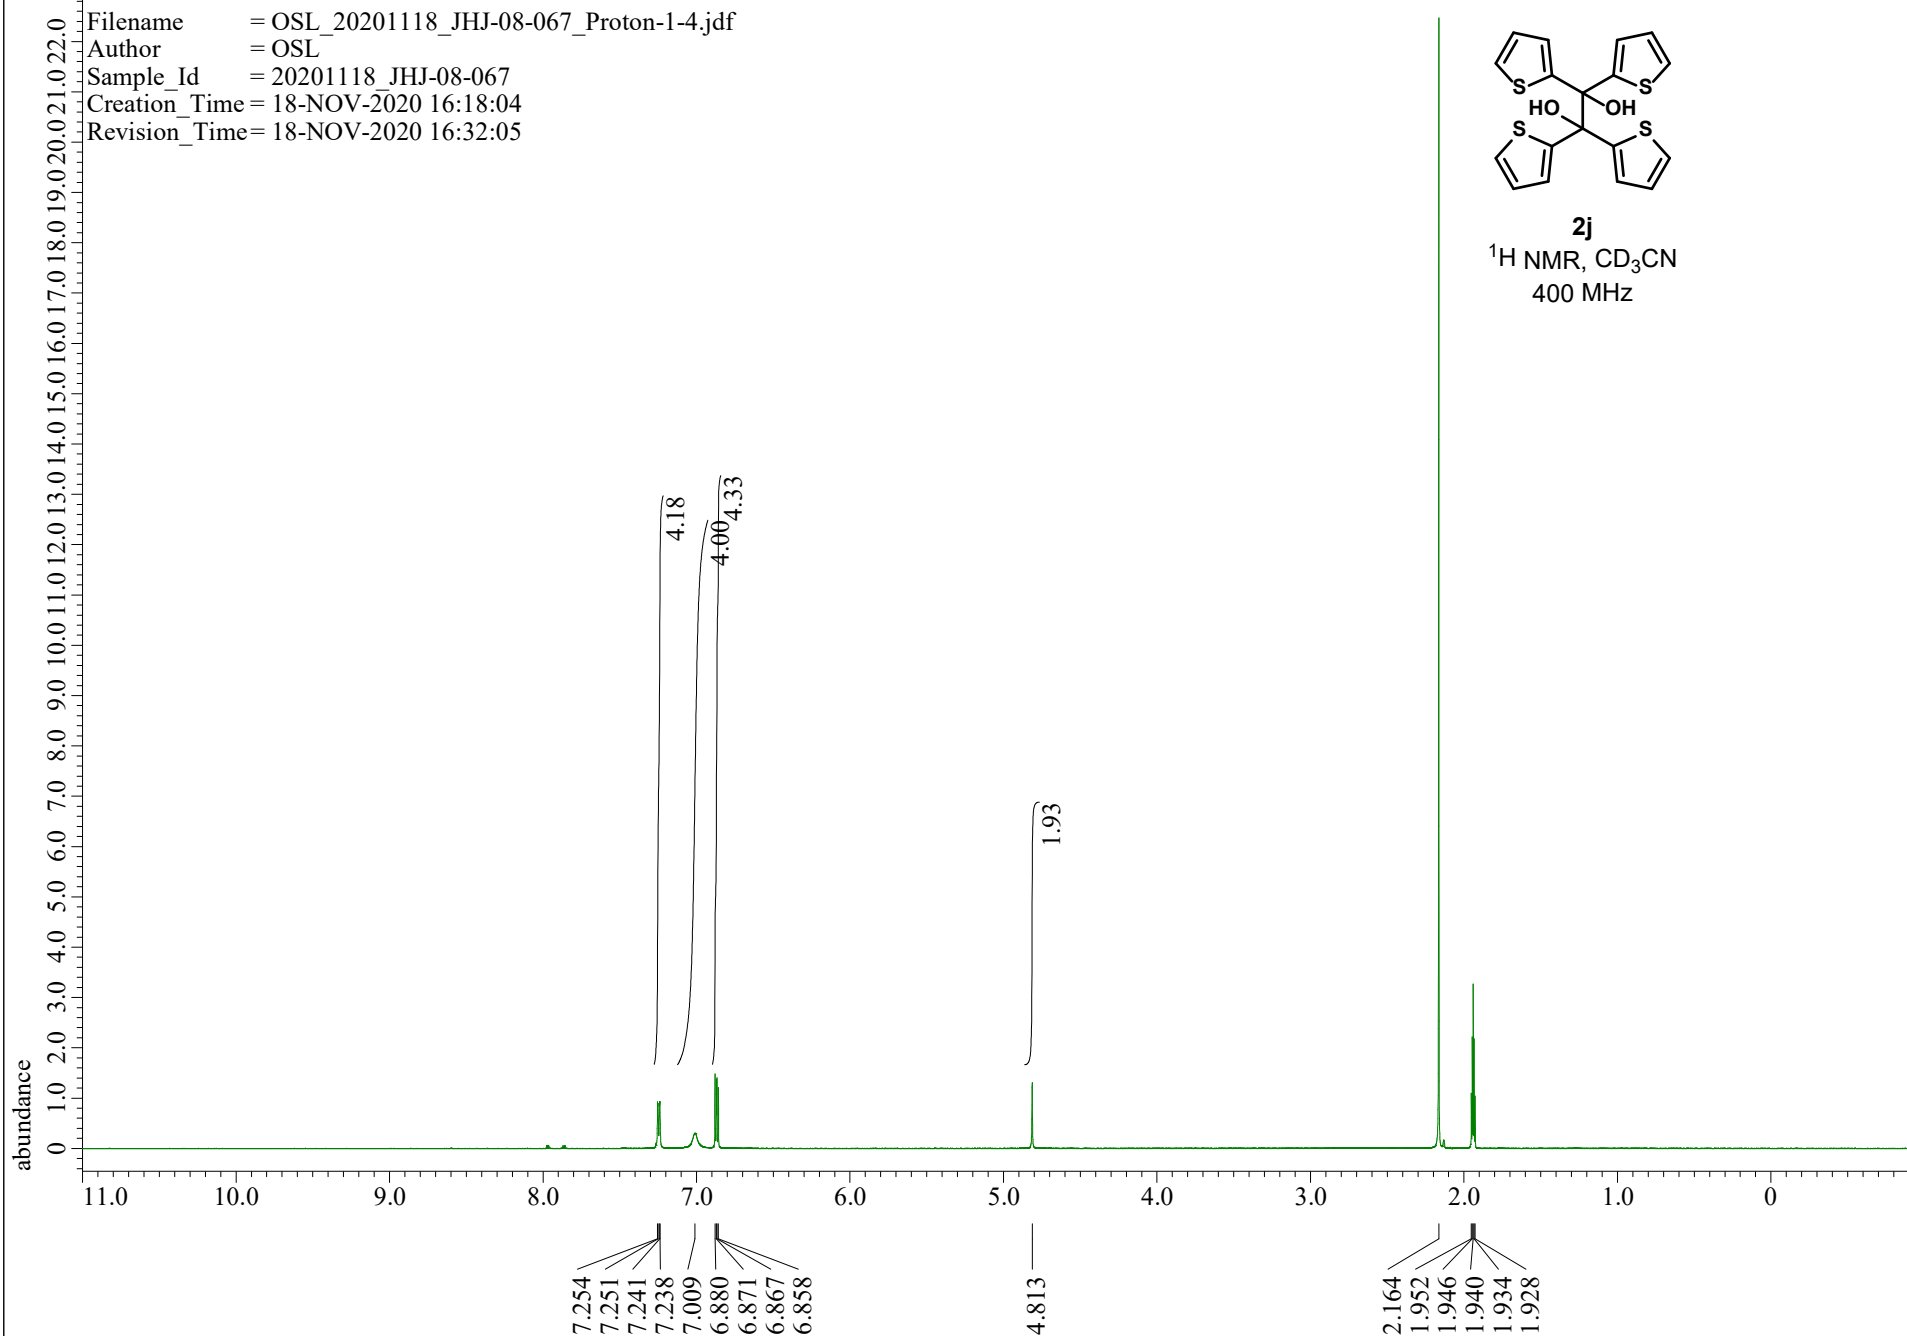

X : parts per Million : Proton

Filename = OSL\_20201027\_JHJ-08-067 (CD3CN)\_Carbon\_copy4-1+4.jdf  
Author = OSL  
Sample\_Id = 20201027\_JHJ-08-067 (acetone d6)  
Creation\_Time = 27-OCT-2020 22:15:01  
Revision\_Time = 19-NOV-2020 10:48:04

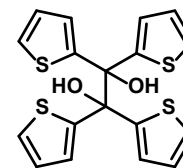

**2j**  
<sup>13</sup>C NMR, CD<sub>3</sub>CN  
100 MHz

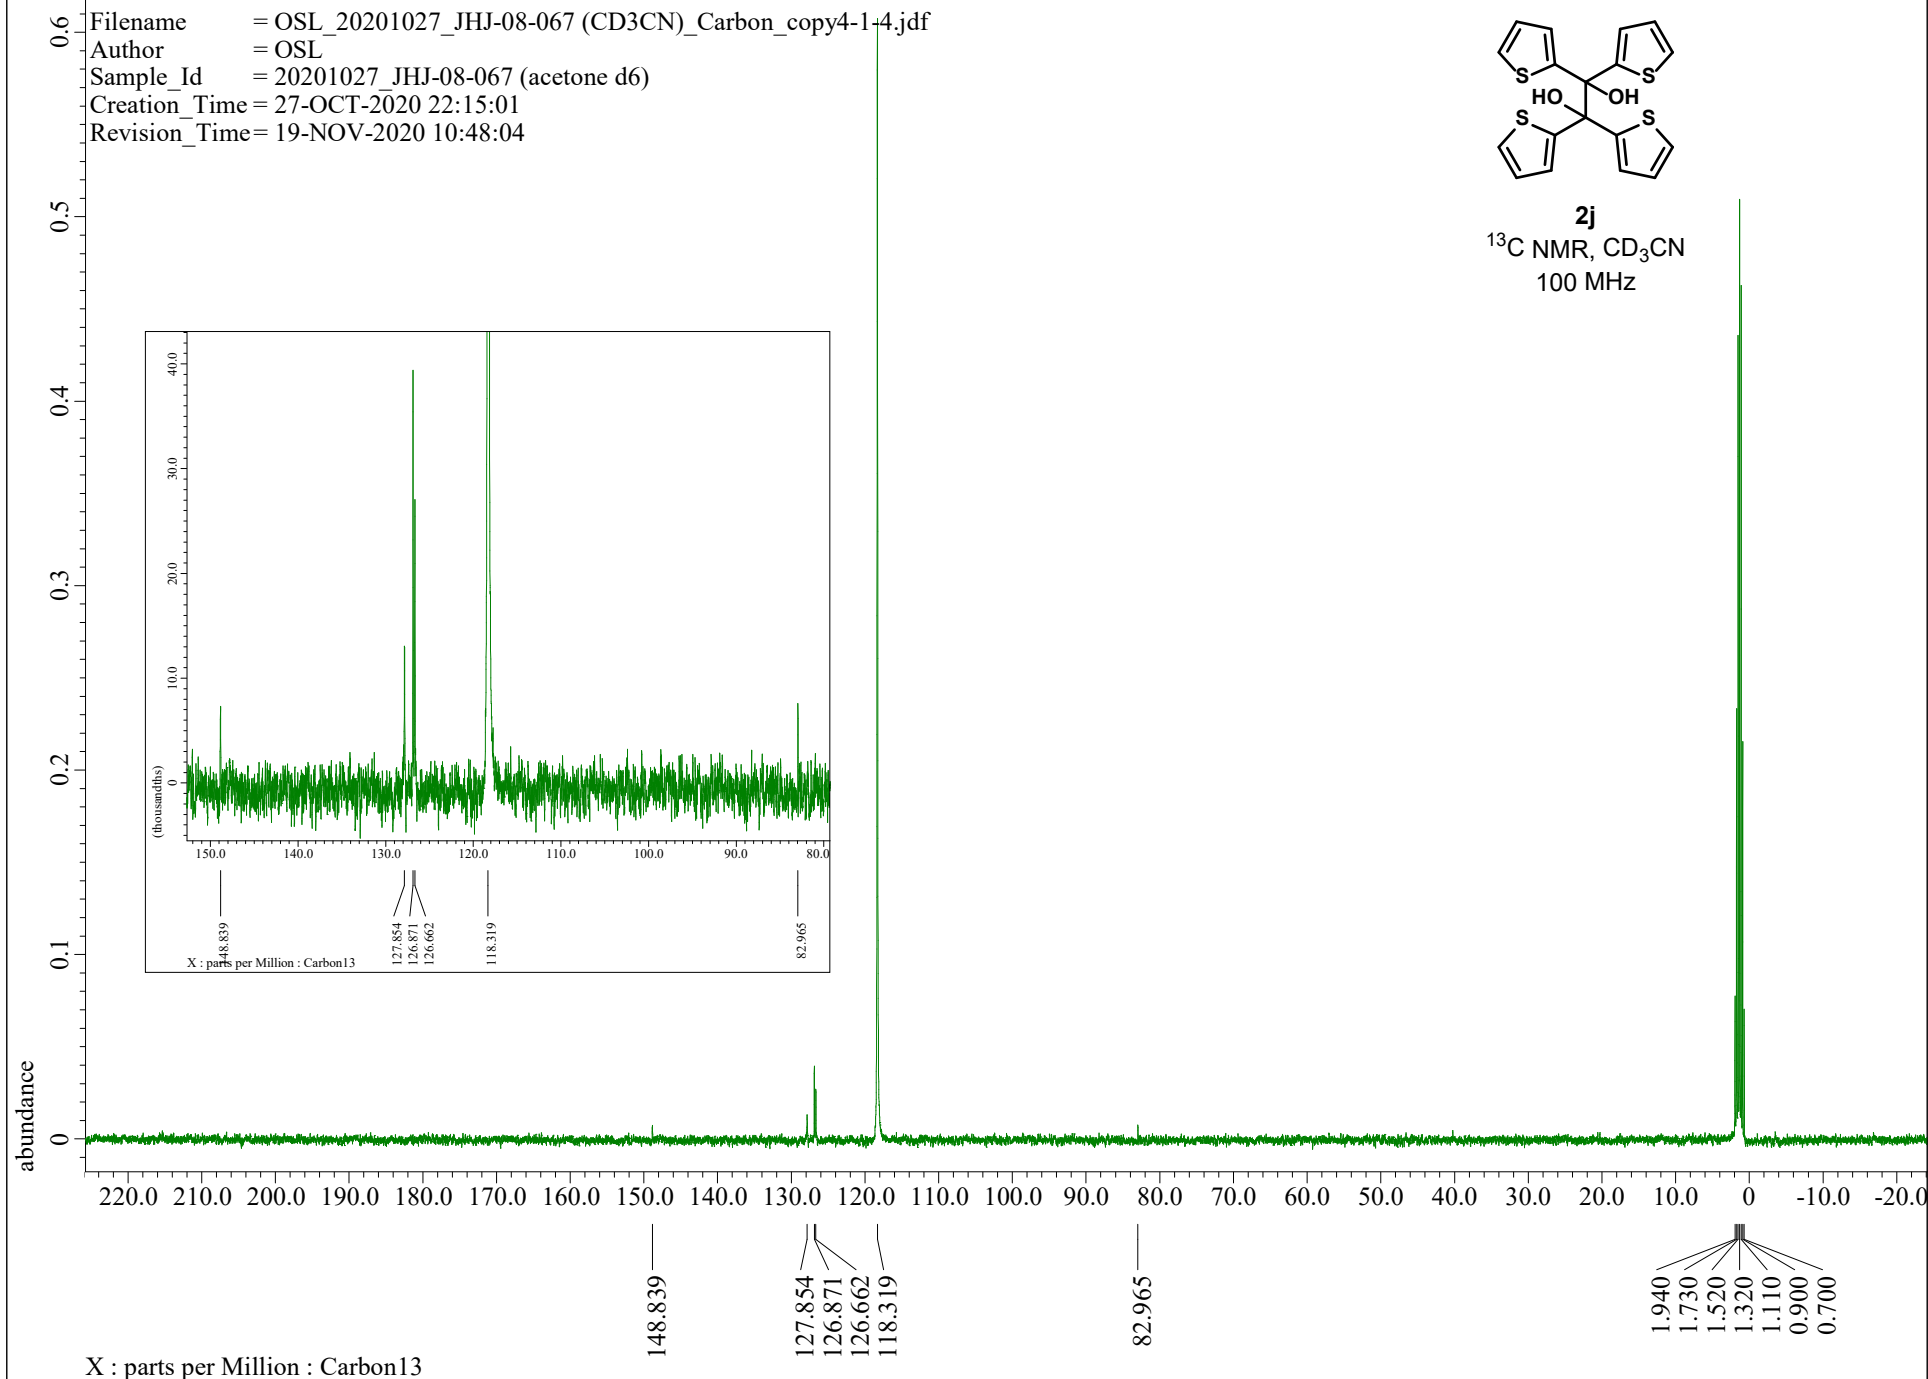

Filename = OSL\_20201118\_JHJ-08-069\_Proton-1-17.jdf  
Author = OSL  
Sample\_Id = 20201118\_JHJ-08-069  
Creation\_Time = 18-NOV-2020 16:06:29  
Revision\_Time = 18-NOV-2020 16:55:08

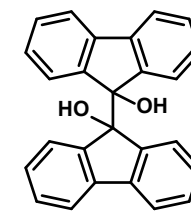

**2k**  
<sup>1</sup>H NMR, acetone-d<sub>6</sub>  
400 MHz

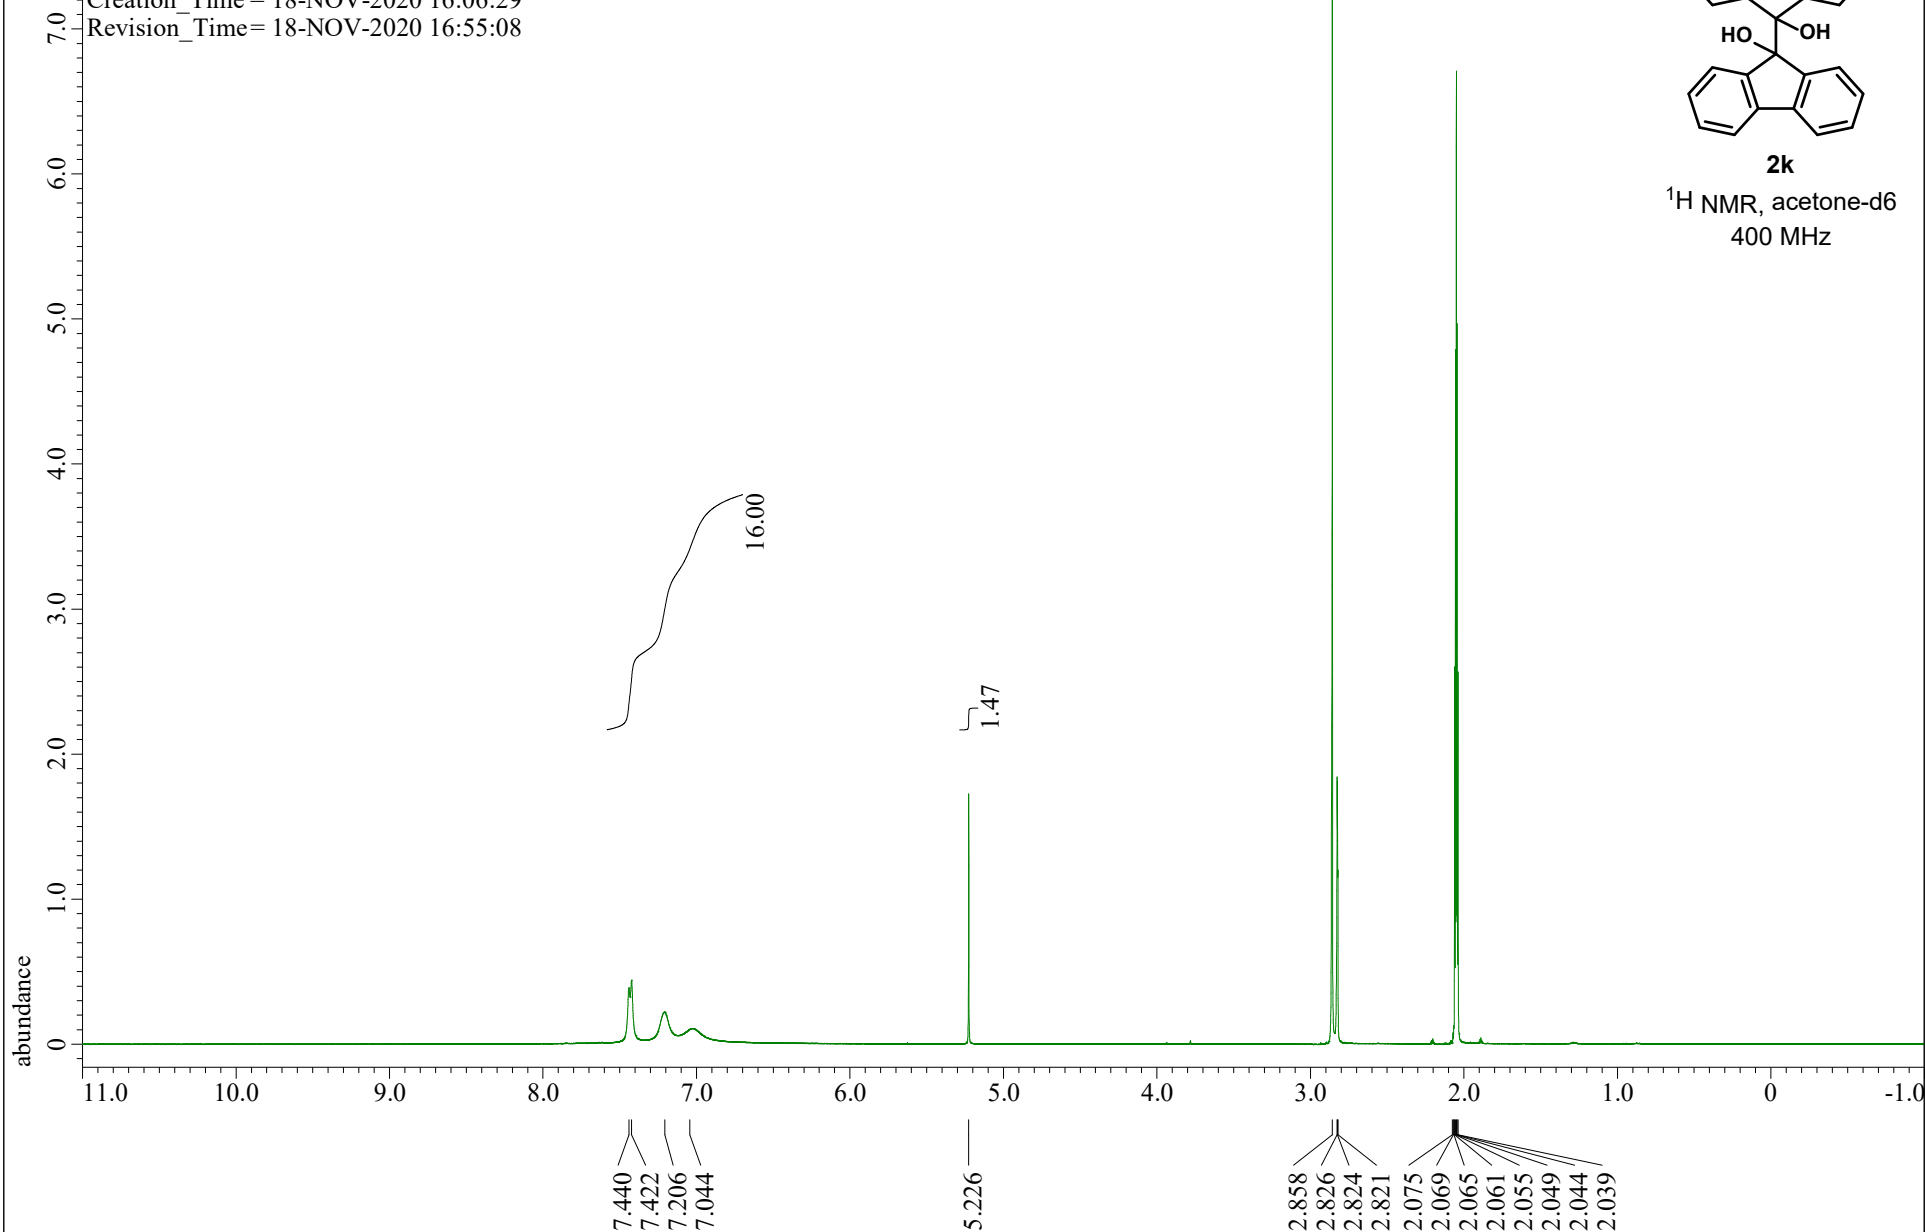

X : parts per Million : Proton

Filename = OSL\_JHJ-08-082 CD2Cl2\_Proton-1-74.jdf  
Author = delta  
Sample\_Id = JHJ-08-082 CD2Cl2  
Creation\_Time = 28-NOV-2020 14:13:51  
Revision\_Time = 30-NOV-2020 15:32:41  
Inst\_Model\_Number =  
Inst\_Serial\_Number =  
Version = 5.0.6 [Windows]

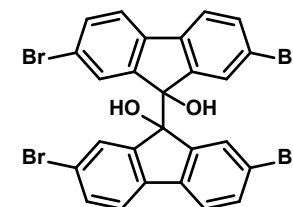

**2I**

<sup>1</sup>H NMR, CD<sub>2</sub>Cl<sub>2</sub>  
400 MHz

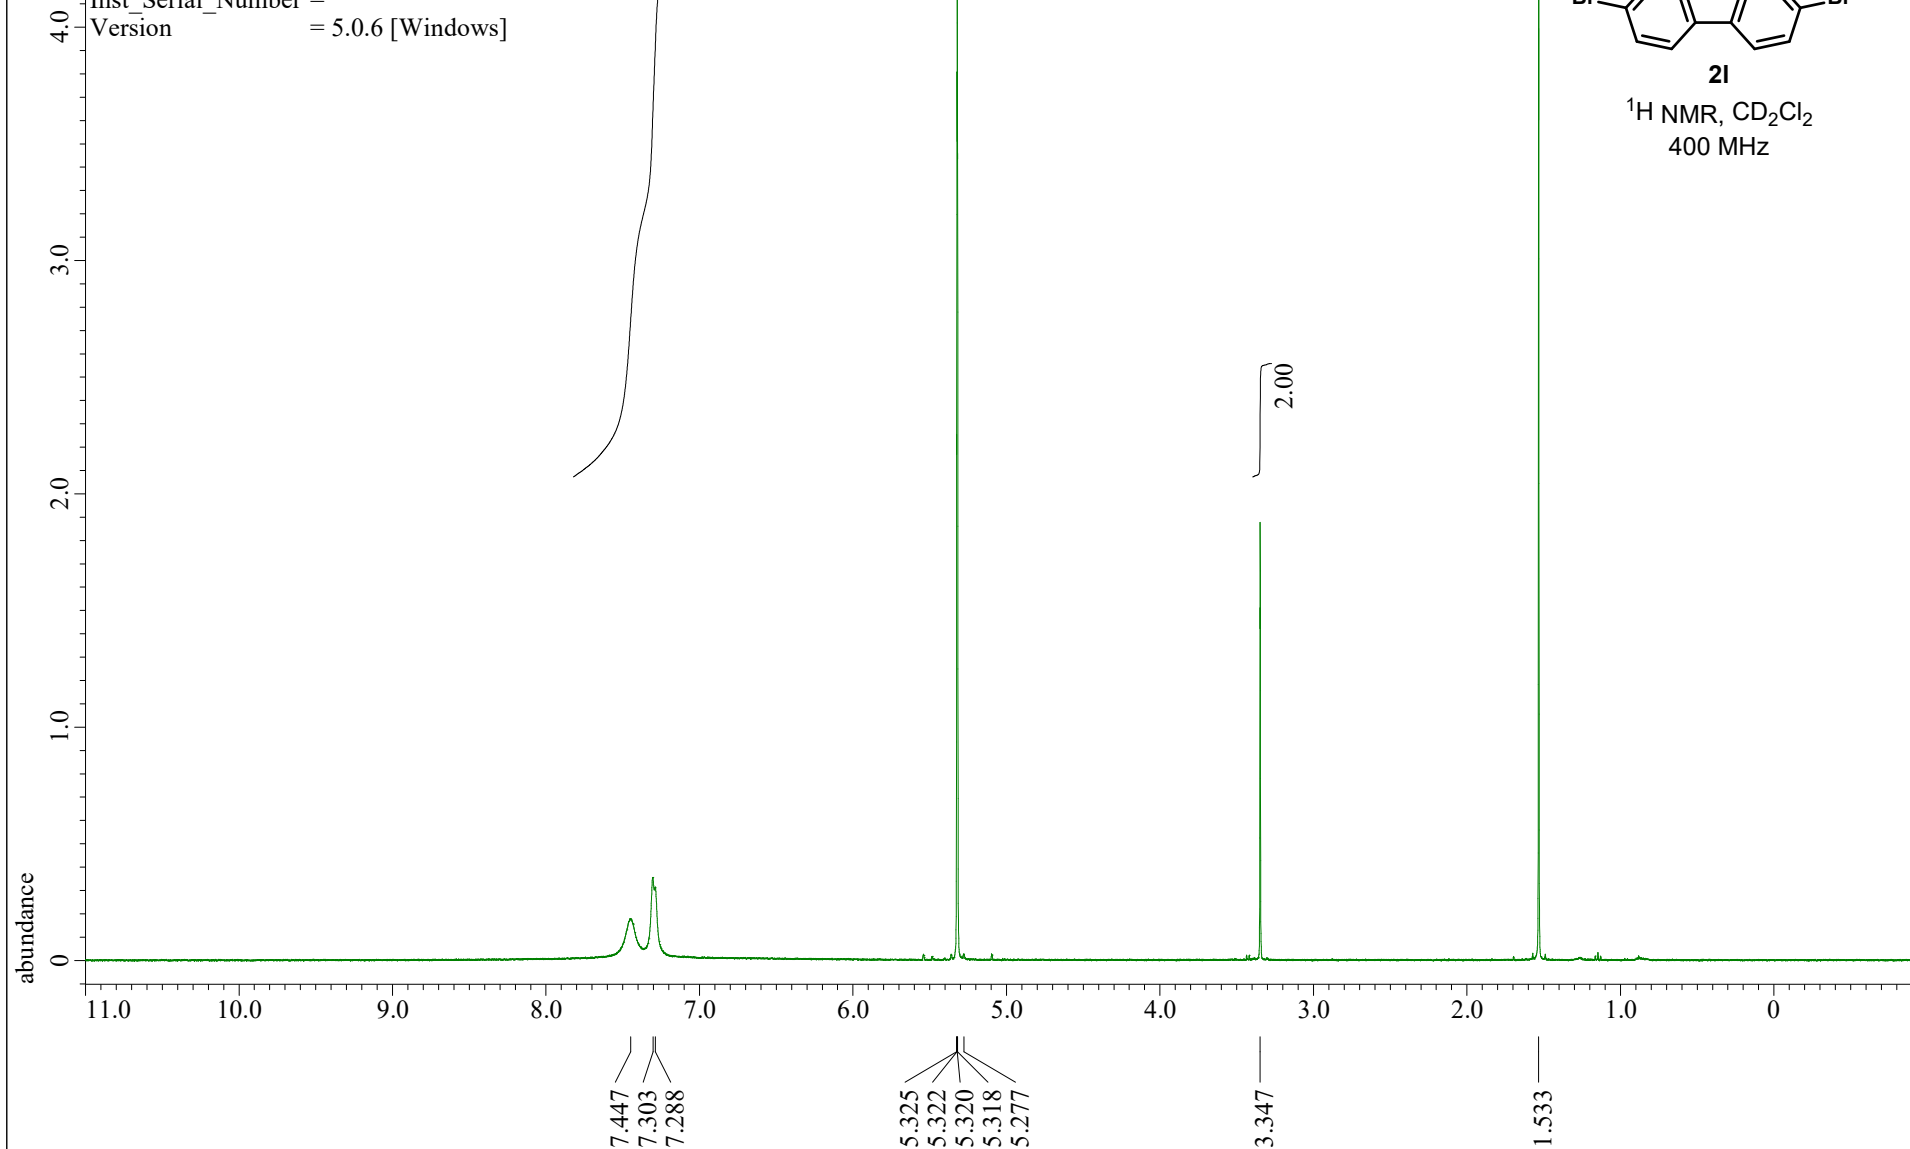

X : parts per Million : Proton



Filename = OSL\_JHJ-08-082 CD2Cl2\_Carbon\_copy14-1-5.jdf  
Author = delta  
Sample\_Id = JHJ-08-082 CD2Cl2  
Creation\_Time = 28-NOV-2020 14:15:39  
Revision\_Time = 30-NOV-2020 15:20:44  
Inst\_Model\_Number =  
Inst\_Serial\_Number =  
Version = 5.0.6 [Windows]

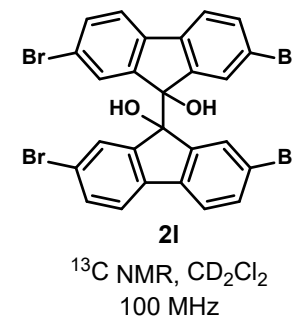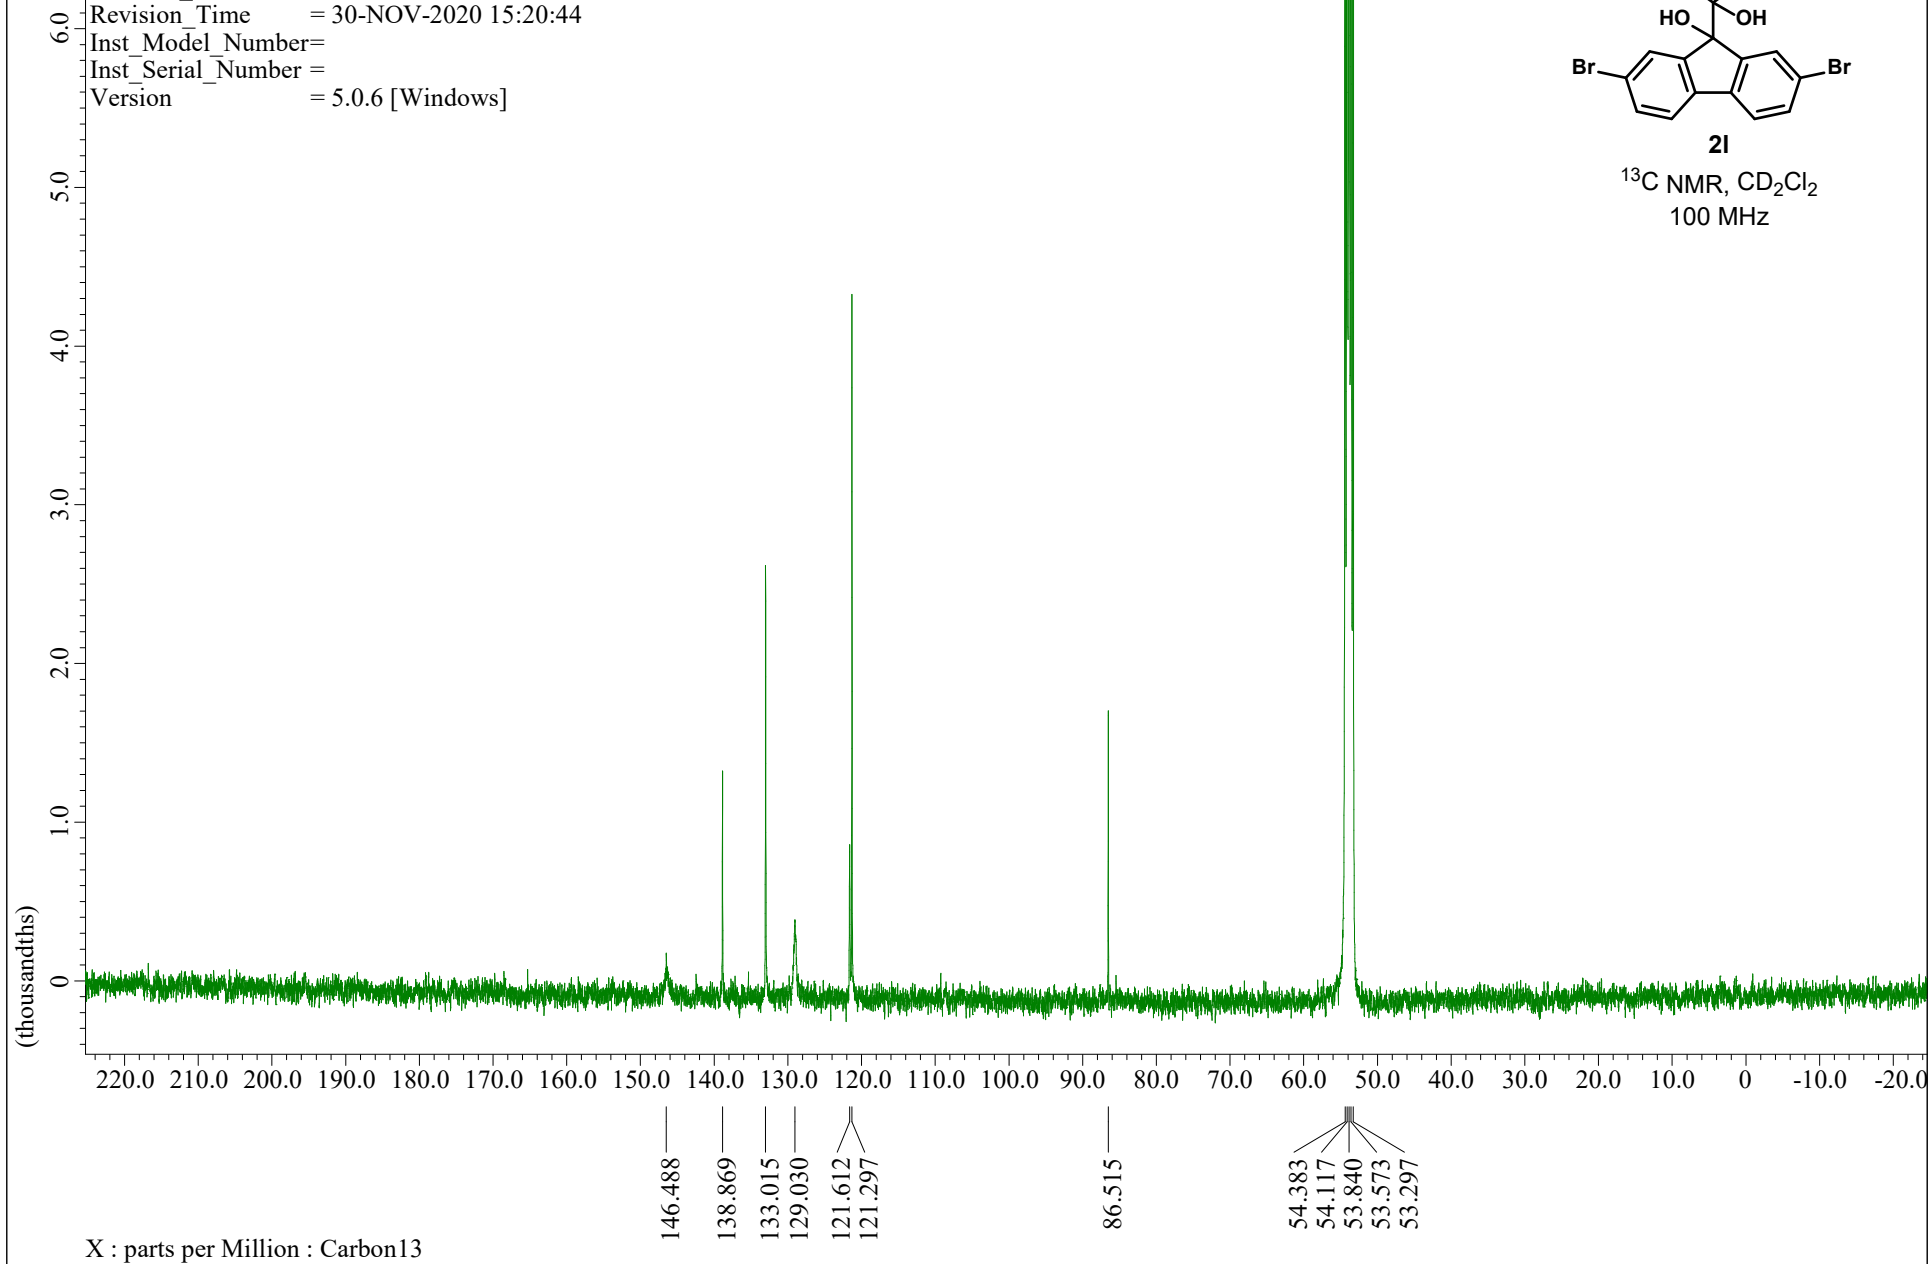

Filename = JHJ-08-071\_Proton-1-20.jdf  
Author = delta  
Sample\_Id = JHJ-08-071  
Creation\_Time = 18-NOV-2020 17:28:11  
Revision\_Time = 19-NOV-2020 16:00:32  
Inst\_Model\_Number =  
Inst\_Serial\_Number =  
Version = 5.0.6 [Windows]

4.16  
4.00  
4.12  
4.01

2.05

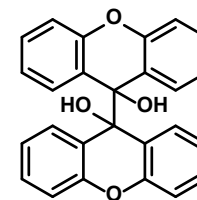

**2m**

<sup>1</sup>H NMR, CD<sub>2</sub>Cl<sub>2</sub>  
400 MHz

abundance

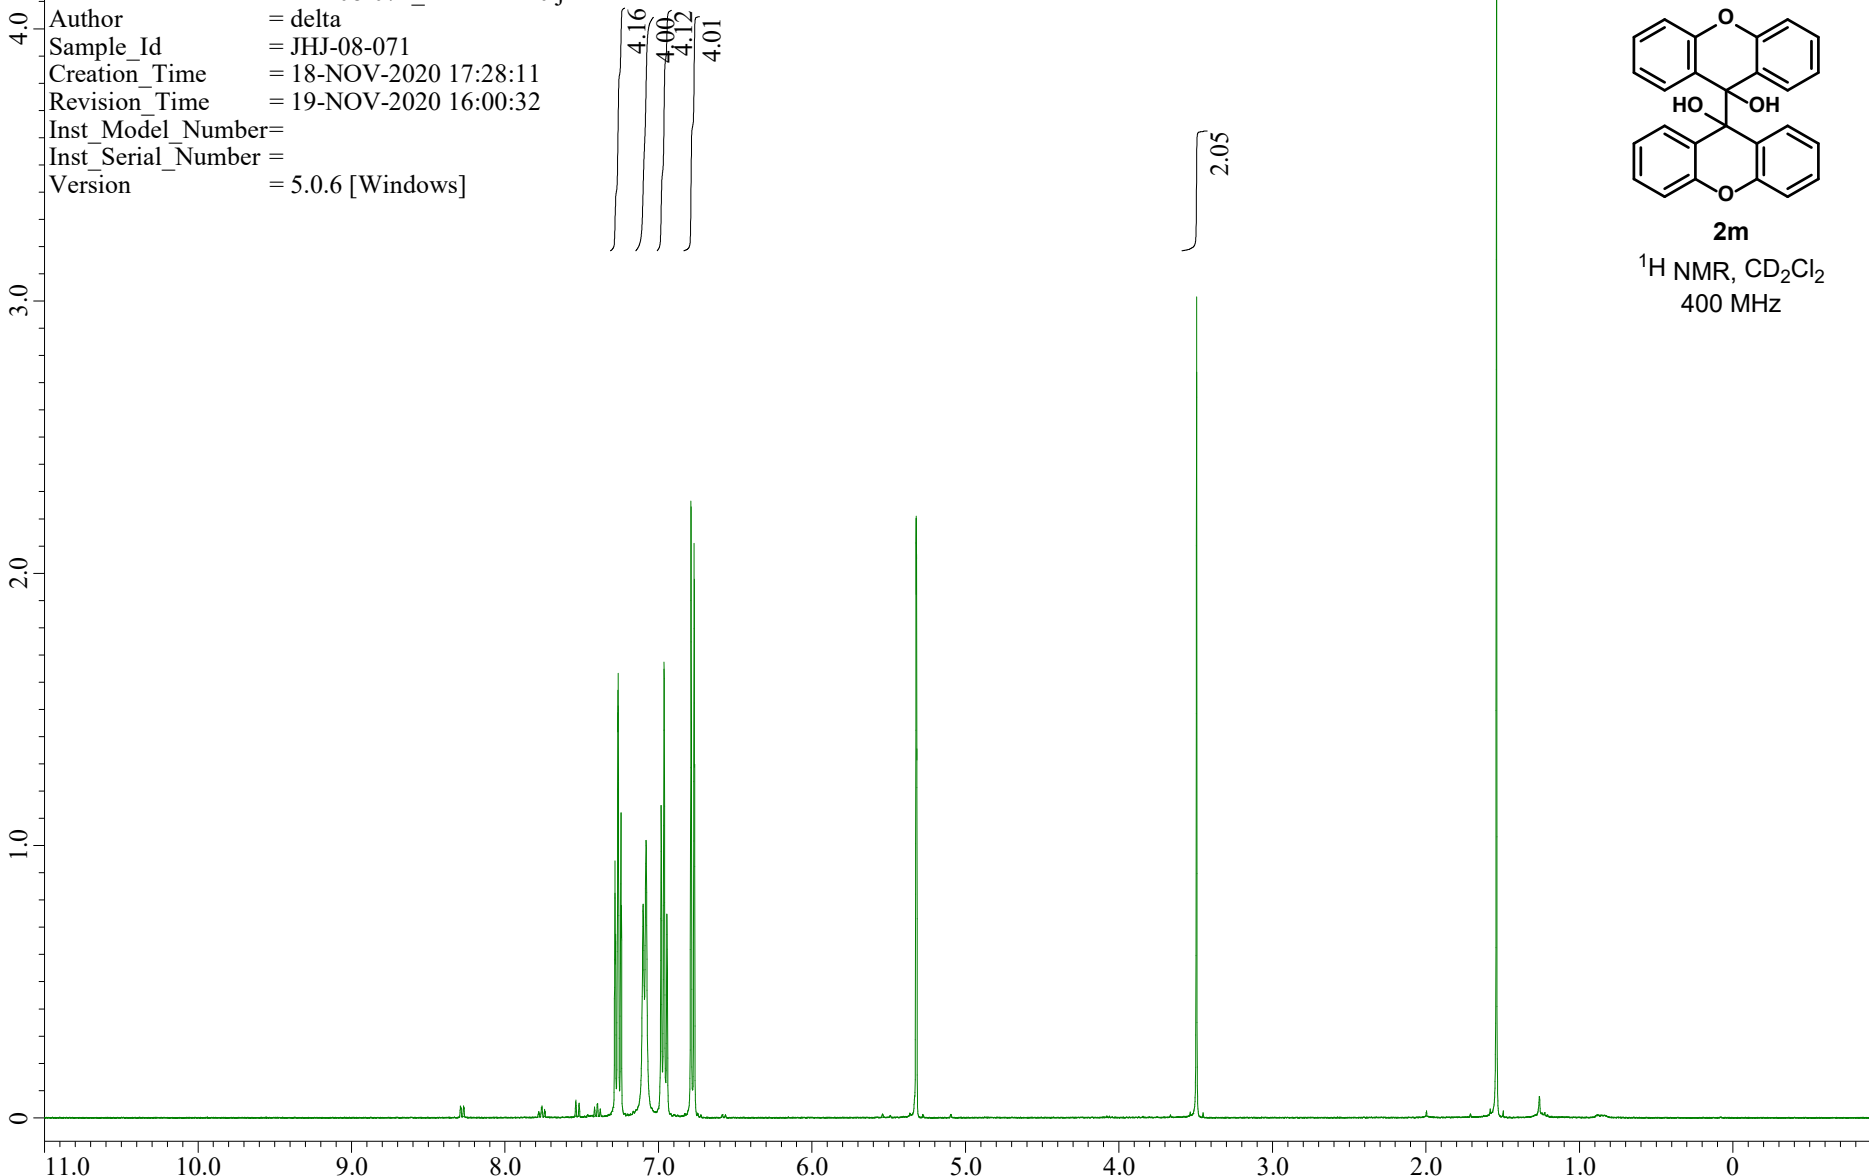

7.283  
7.265  
7.262  
7.245  
7.241  
7.100  
7.081  
6.983  
6.964  
6.788  
6.785  
6.768  
6.765

5.322  
5.320  
5.319  
5.317

3.494

1.540

X : parts per Million : Proton

Filename = OSL\_20201021\_JHJ-08-074 column tube 44-70\_Proton-1-3.jdf  
Author = OSL  
Sample\_Id = 20201021\_JHJ-08-074 column tube 44-70  
Creation\_Time = 21-OCT-2020 17:34:15  
Revision\_Time = 18-NOV-2020 15:28:39

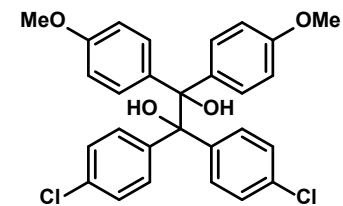

**2n**  
<sup>1</sup>H NMR, CDCl<sub>3</sub>  
400 MHz

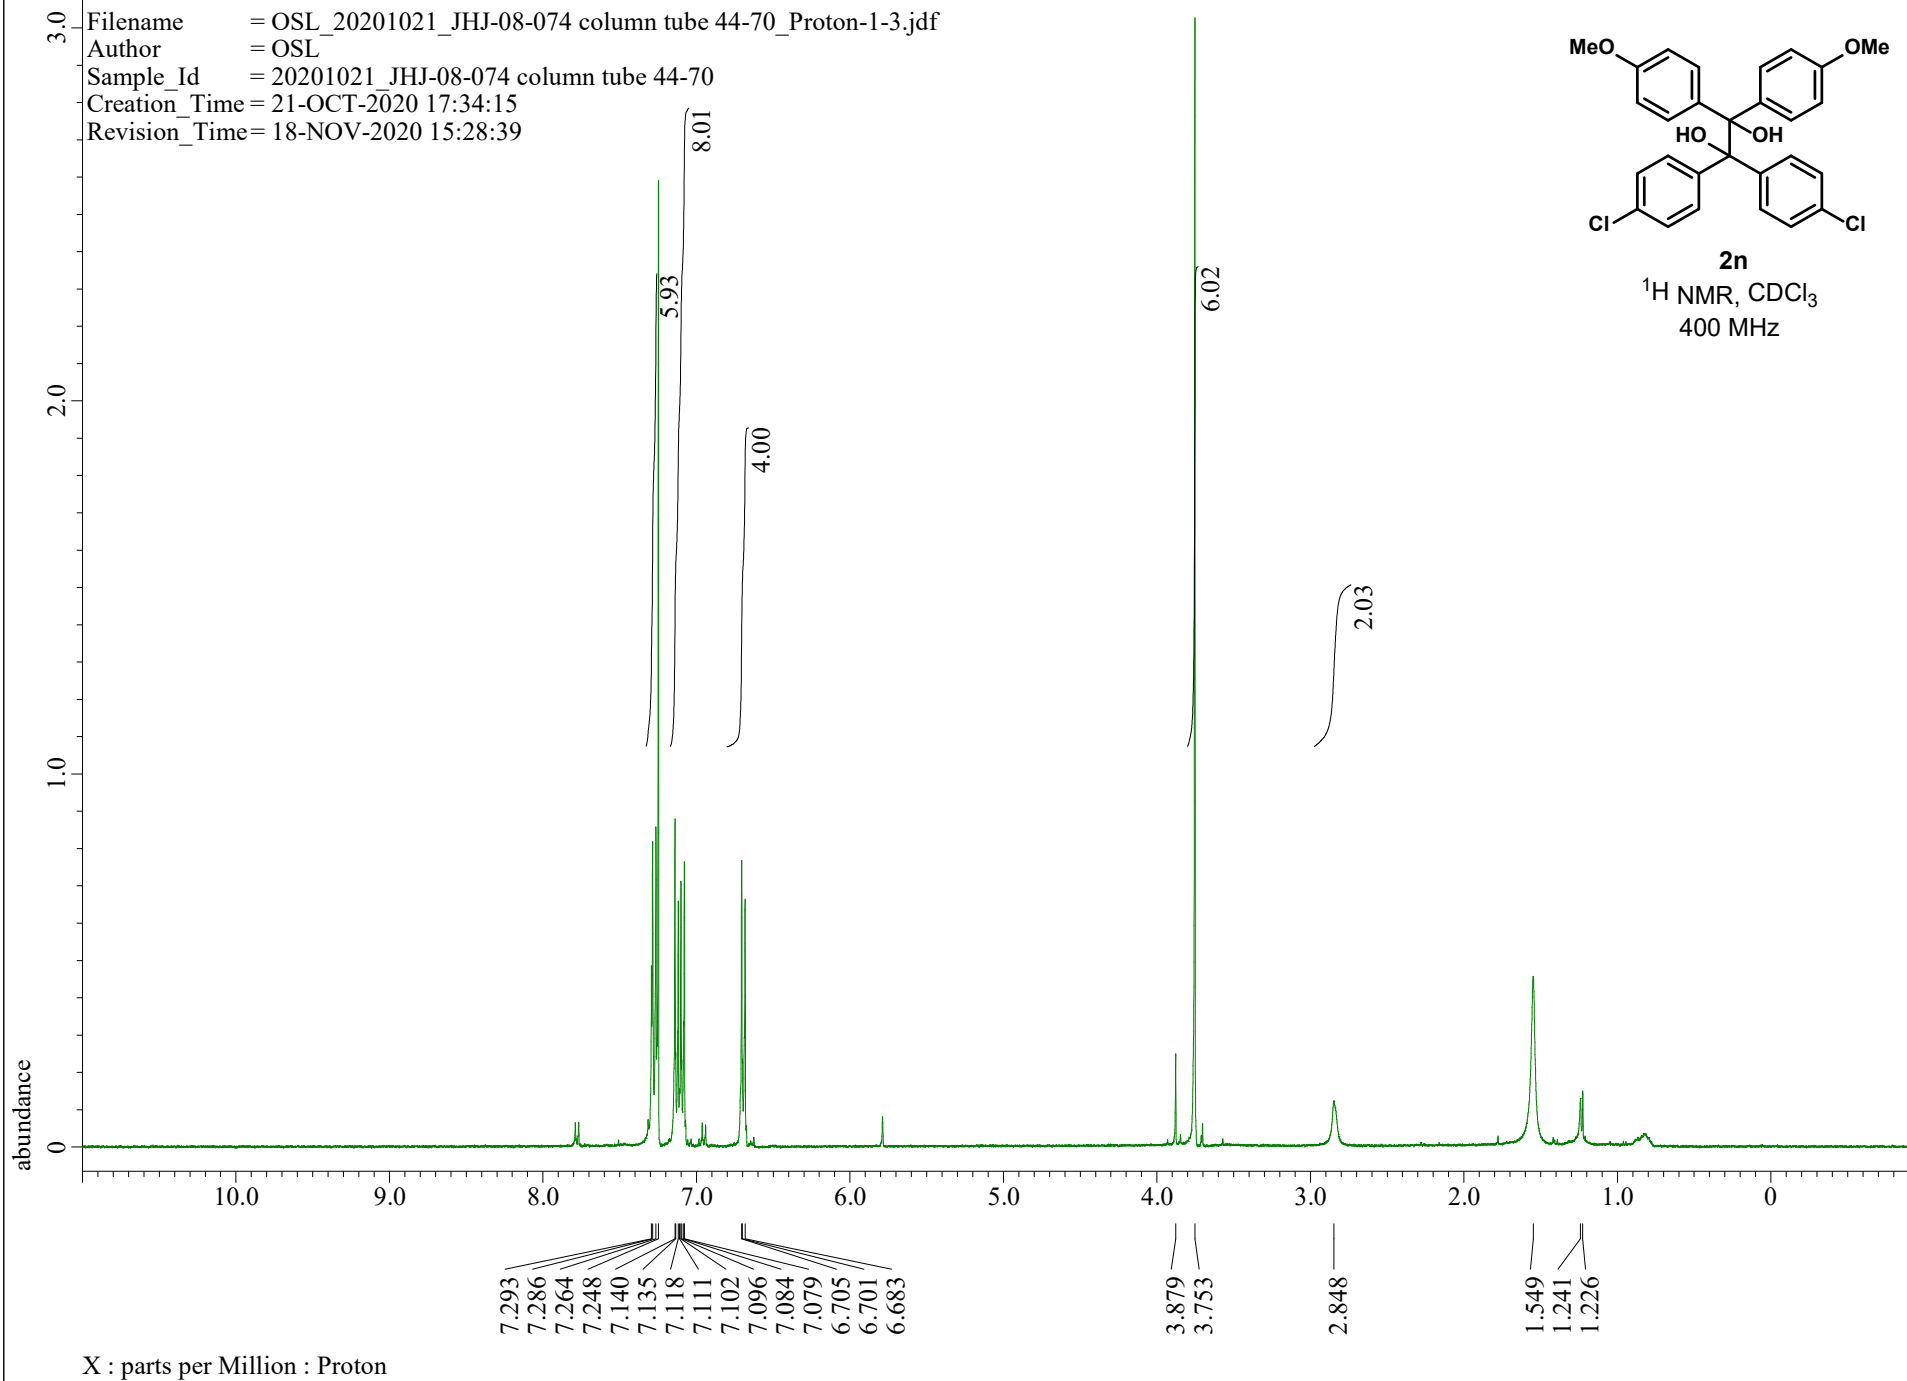

X : parts per Million : Proton

Filename = OSL\_20201026\_JHJ-08-074\_Carbon-1-2.jdf  
Author = OSL  
Sample\_Id = 20201026\_JHJ-08-074  
Creation\_Time = 26-OCT-2020 19:05:32  
Revision\_Time = 26-OCT-2020 19:29:49

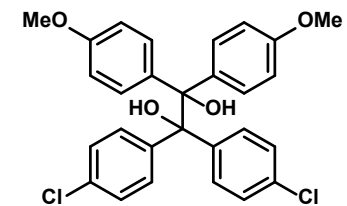

**2n**

$^{13}\text{C}$  NMR,  $\text{CDCl}_3$   
100 MHz

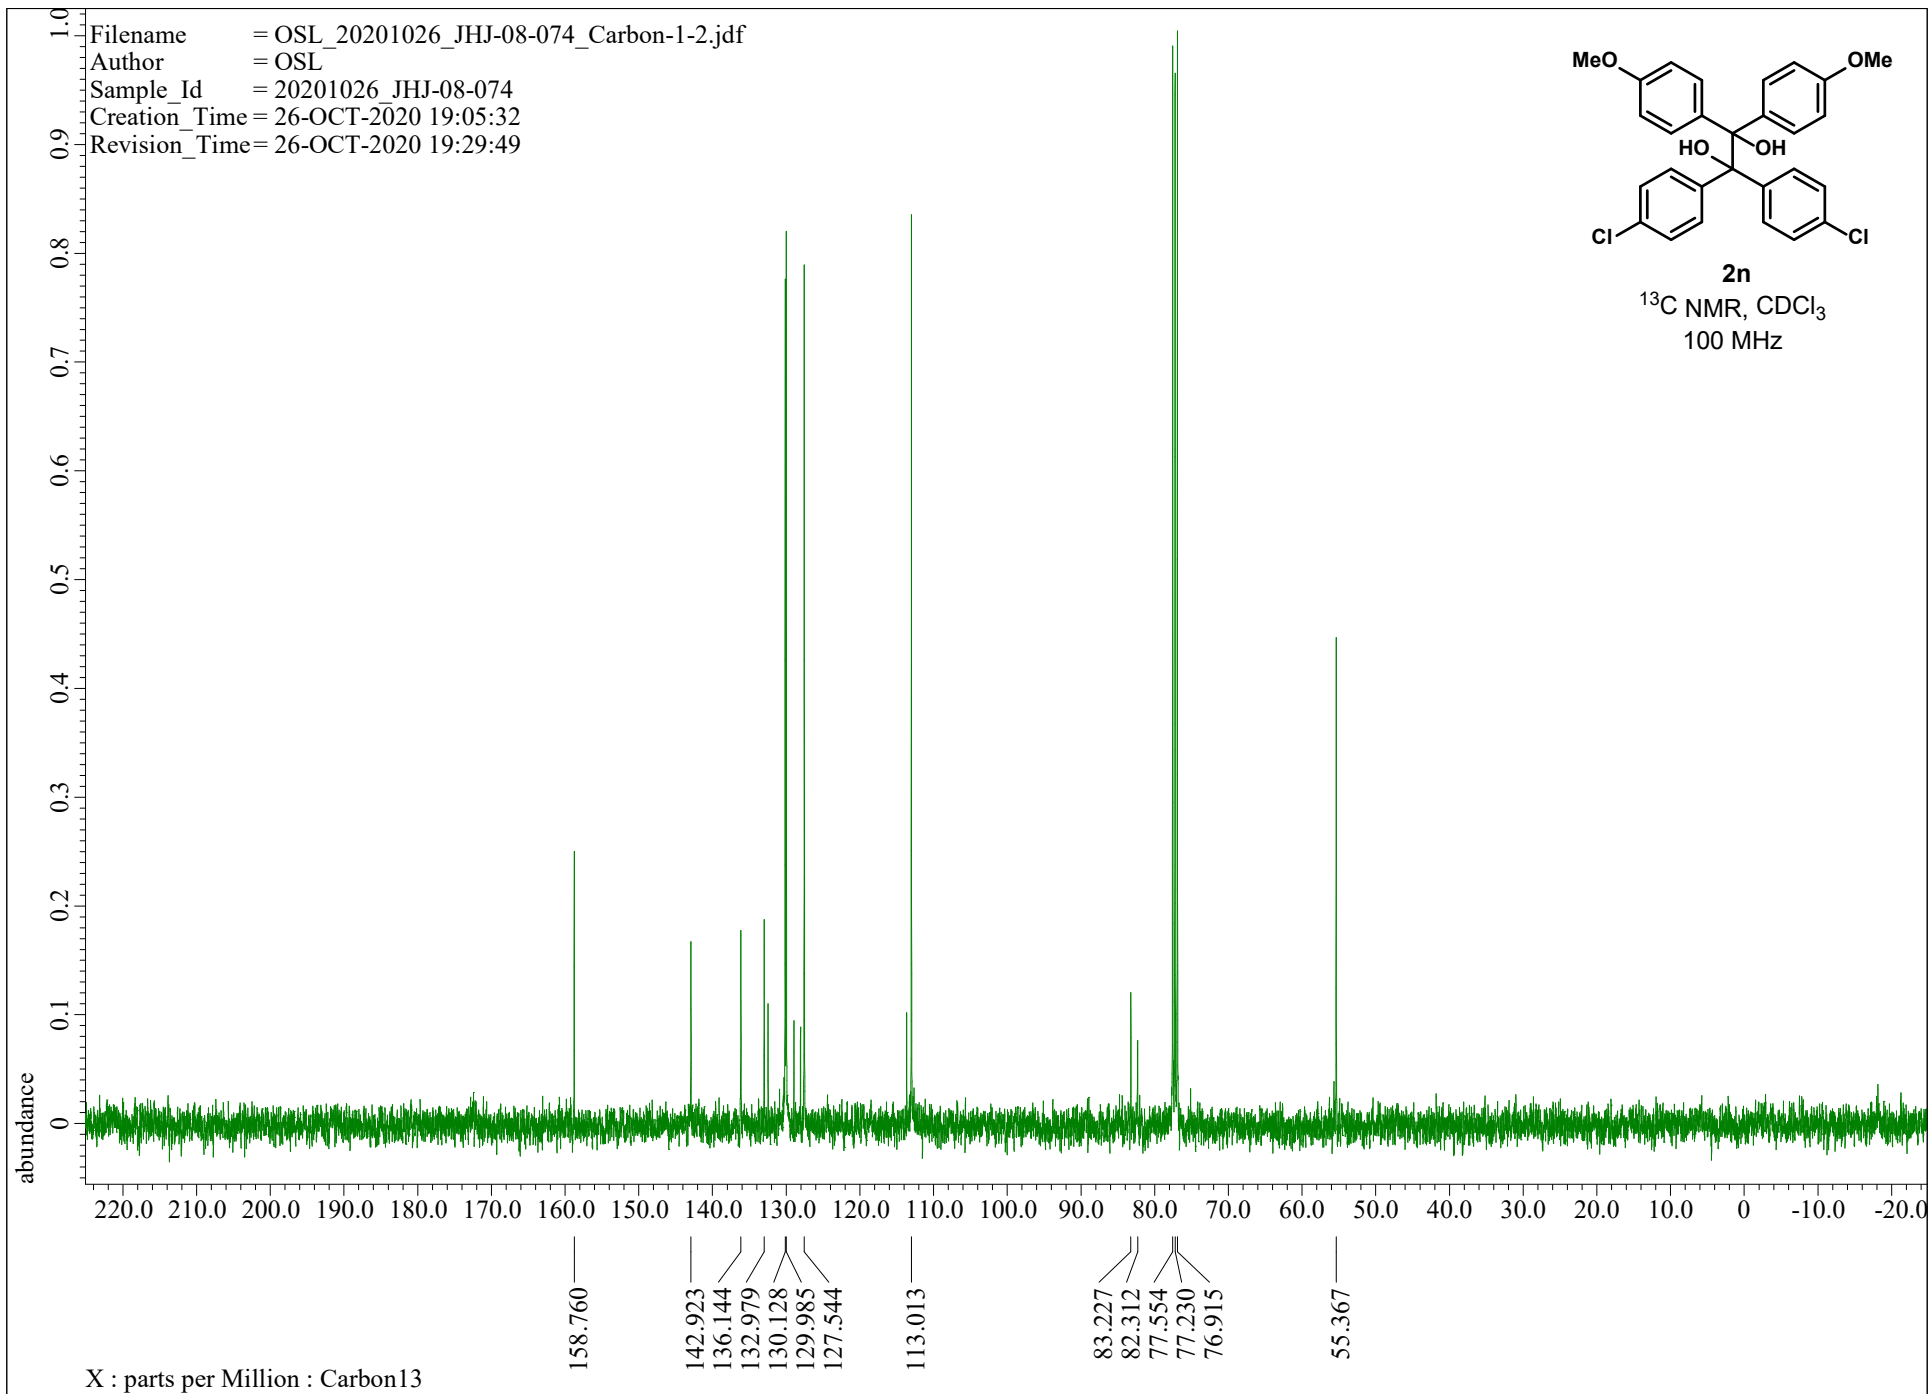

X : parts per Million : Carbon13

Filename = OSL\_20201029\_JHJ-08-079 column tube 19-30\_Proton-1-3.jdf  
Author = OSL  
Sample\_Id = 20201029\_JHJ-08-079 column tube 19-30  
Creation\_Time = 29-OCT-2020 21:03:45  
Revision\_Time = 19-NOV-2020 19:52:27

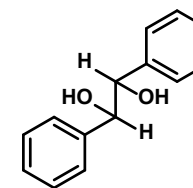

**4a**  
<sup>1</sup>H NMR, CDCl<sub>3</sub>  
400 MHz

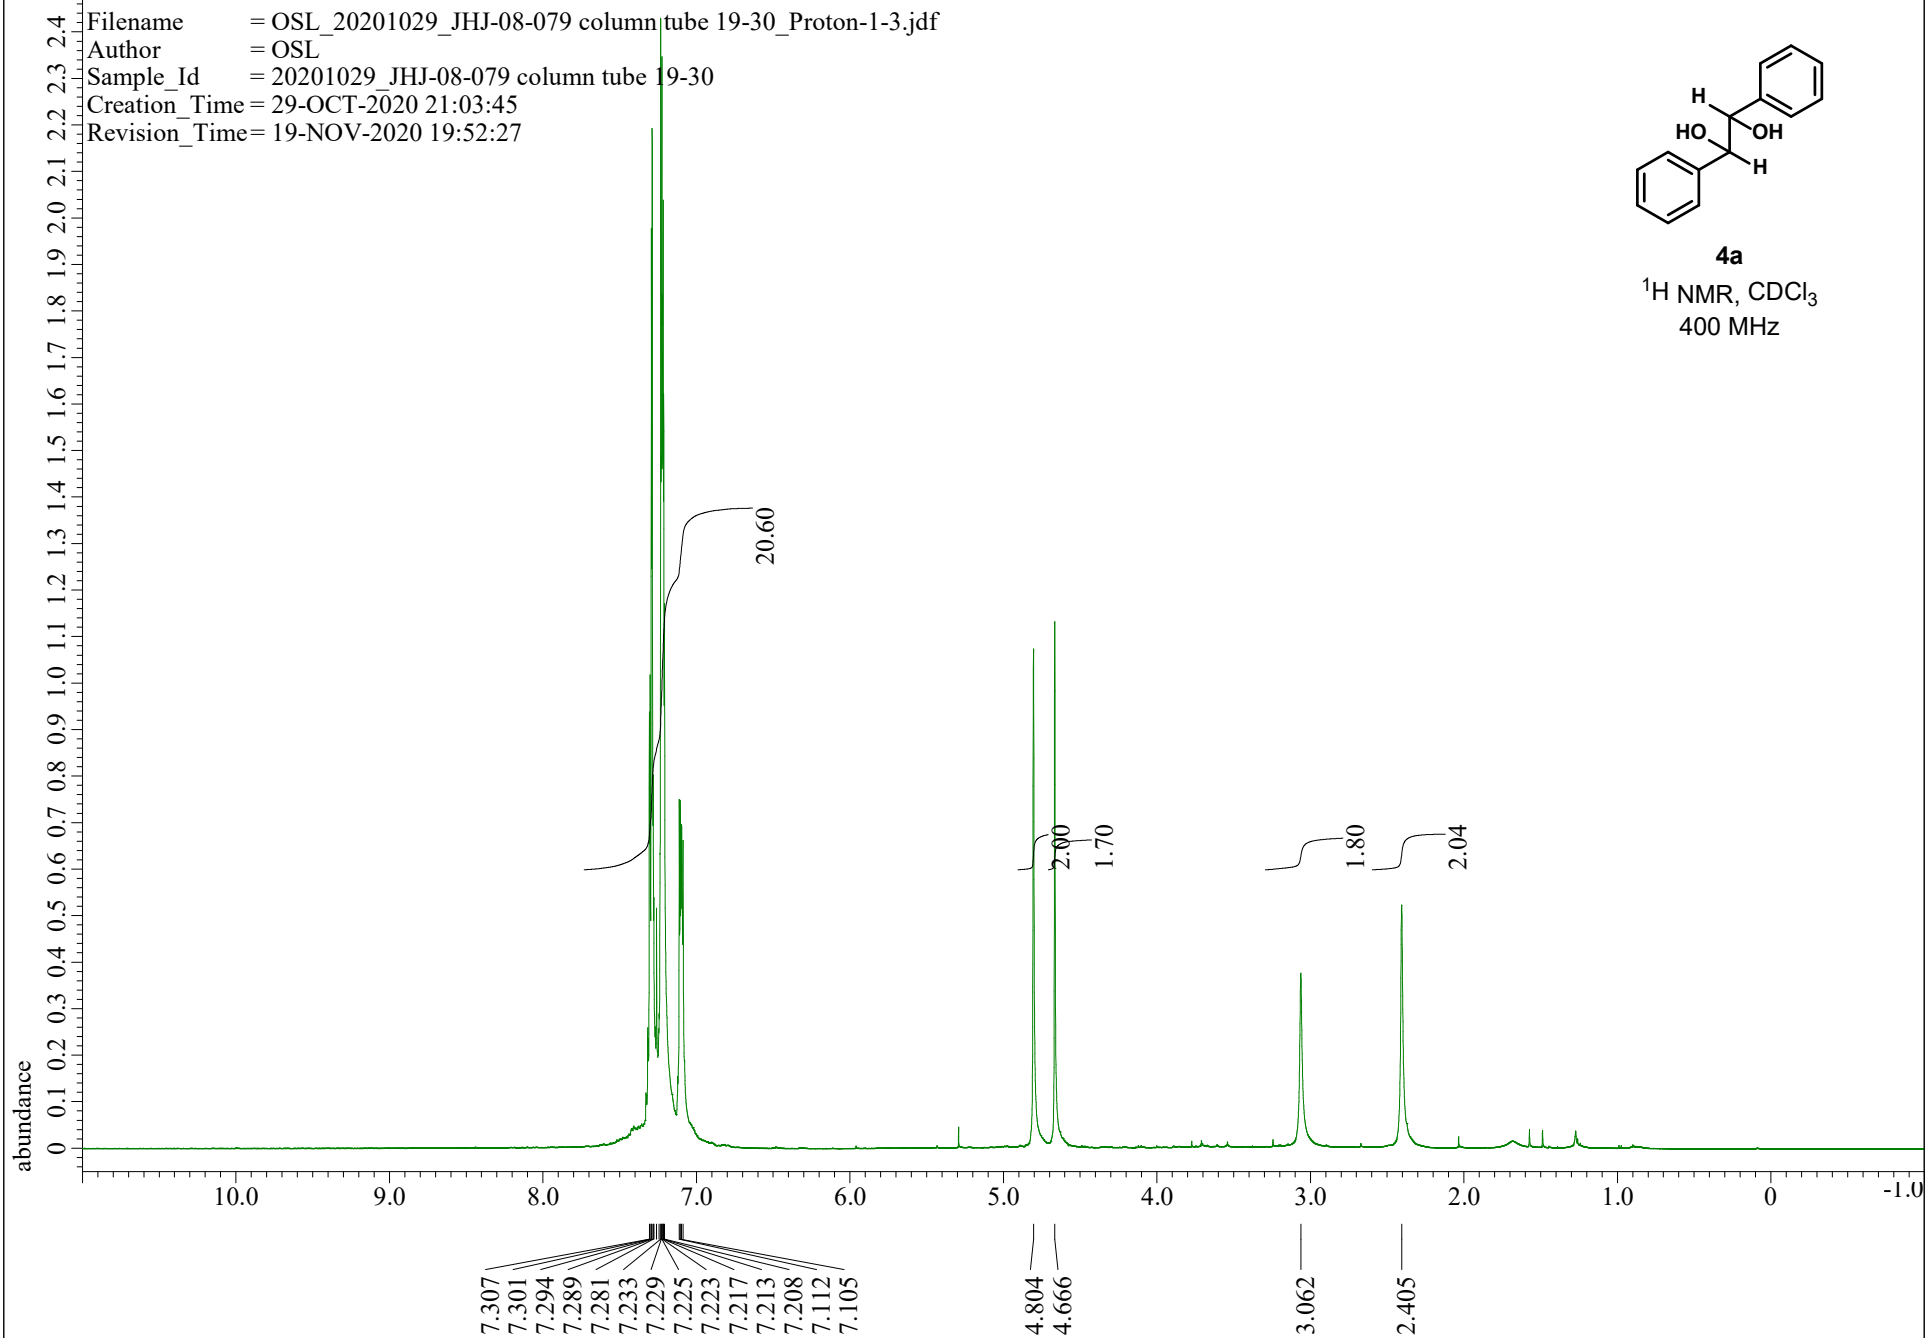

Filename = OSL\_20201028\_JHJ-08-077 2nd column tube 14-18\_Proton-1-3.jdf  
Author = OSL  
Sample\_Id = 20201028\_JHJ-08-077 2nd column tube 14-18  
Creation\_Time = 29-OCT-2020 10:11:20  
Revision\_Time = 19-NOV-2020 19:50:05

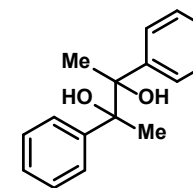

**4b**  
<sup>1</sup>H NMR, CDCl<sub>3</sub>  
400 MHz

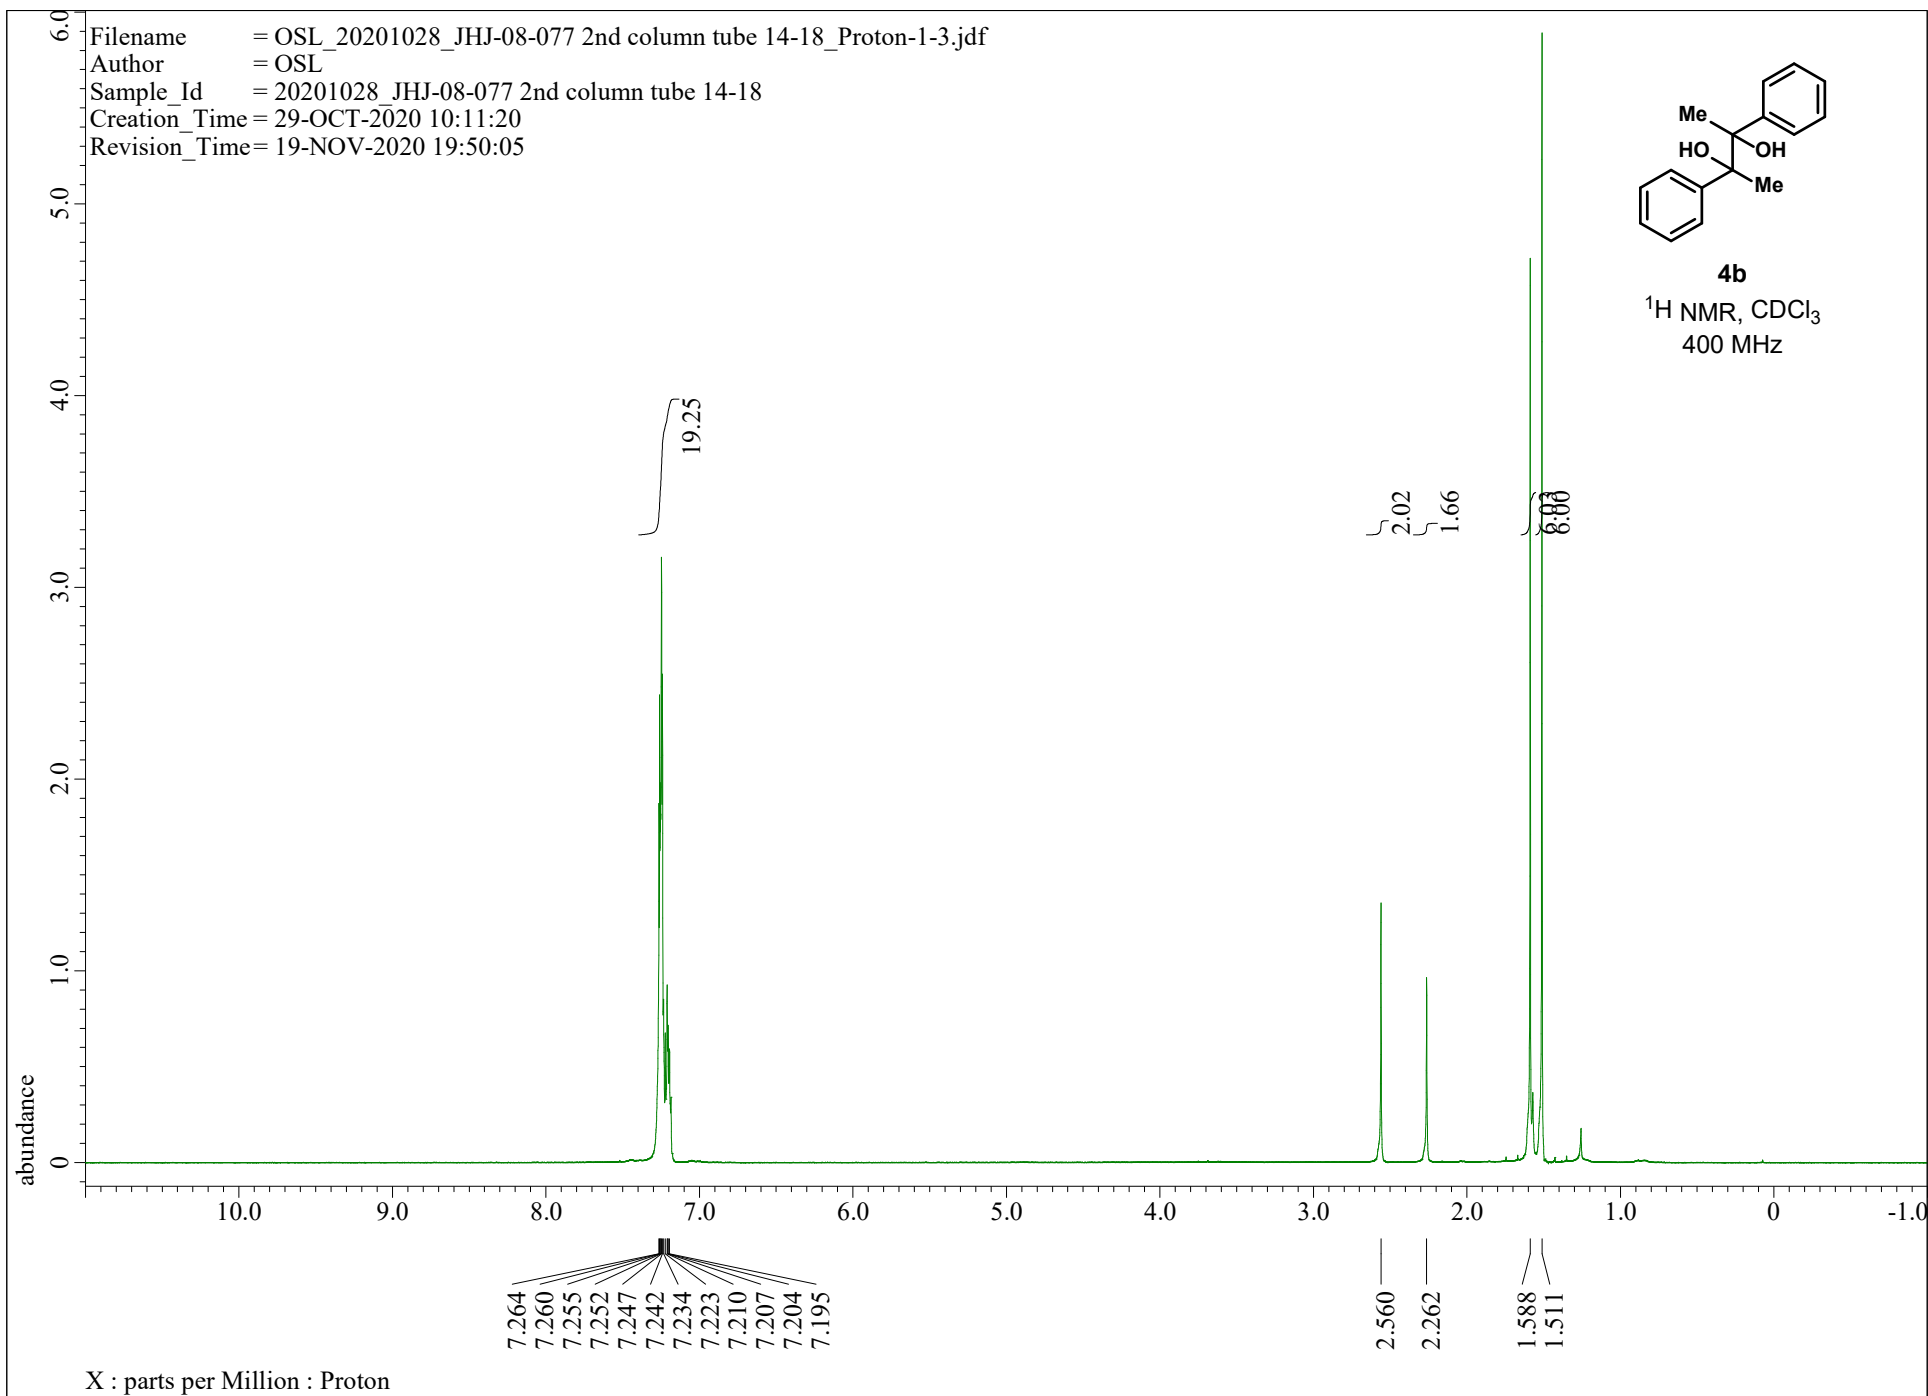

Supplement: d0cc07723b1.pdf [file d0cc07723b1.pdf]
